# Supplementary material
Source: publisher figshare collection journal article supplement (https://gsapubs.figshare.com/articles/dataset/_/22196785)
Supplement: Supplementary file 1 [file 1]

## Sheet: Summary
Summary of 40Ar/39Ar results
								Mean Age
Sample	Unit	Location	L#	Irrad	material	analysis	n	MSWD	Age(Ma)	±	1s
Thtr	Hogeye tuff trachyte member	30.753553N -105.007778W	68531	NM-316P	Sanidine	Mean	21	4.49	38.1663	±	0.0156425
Tc	conglomerate in rift basin	30.732183N -104.979671W	68403	NM-316C	DetritalSanidine	crystal 128	1		11.8571	±	0.0112733
Tb	basalt flow	30.753700N -105.003685W	68499	NM-316N	Groundmass	Plateau	4	2.14	37.5426	±	0.0503857
Notes:
L# = Laboratory identifier
Irrad = Irradiaton identifier and irradiation tray
analysis: Mean = weighted mean of single crystal dates, Plateau = Weighted mean of selected heating steps

## Sheet: Sanidine ratio data
	ID	Power	40Ar/39Ar	37Ar/39Ar	36Ar/39Ar	39ArK	K/Ca	40Ar*	Age	±1s
		(watts)			(x 10-3)	(x 10-15 mol)		(%)	(Ma)	(Ma)
	Thtr, Sanidine, J=0.0034655±0.03%, IC=0.9914381±0.0010057, NM-316P, Lab#=68531, Argus VI
	23	3	6.08841	0.0319011	0.059	1.68199	15.9933	99.7558	38.0794	0.0257726
	22	3	6.10664	0.0320579	0.1004	1.06409	15.9151	99.5562	38.1168	0.0385231
	03	3	6.09421	0.0341131	0.0525	2.52727	14.9562	99.7909	38.1287	0.0195704
	06	3	6.10161	0.0392409	0.0782	6.42892	13.0018	99.673	38.1301	0.011536
	11	3	6.13525	0.0343135	0.1905	2.05064	14.8689	99.1268	38.1303	0.0218395
	12	3	6.08905	0.0349165	0.0297	1.58517	14.6121	99.902	38.1387	0.0275654
	07	3	6.103	0.0336833	0.0764	0.787957	15.1471	99.6747	38.1391	0.0520881
	21	3	6.1362	0.0286082	0.1851	2.25618	17.8342	99.1454	38.1431	0.021616
	01	3	6.11288	0.0717625	0.11	2.3089	7.10962	99.5631	38.159	0.0213446
	05	3	6.20797	0.0660811	0.4194	1.47832	7.72088	98.0876	38.1787	0.033444
	16	3	6.10898	0.0381113	0.0694	3.19092	13.3872	99.7145	38.1914	0.014478
	18	3	6.10646	0.0270701	0.0566	1.55648	18.8475	99.7619	38.1934	0.0294606
	17	3	6.12274	0.0418854	0.1142	1.00257	12.181	99.5041	38.1968	0.0389167
	20	3	6.11798	0.0482864	0.0994	0.828699	10.5662	99.5833	38.1976	0.0464618
	13	3	6.11259	0.0330442	0.0727	1.72095	15.44	99.6919	38.2051	0.0228024
	10	3	6.11463	0.0344194	0.0719	2.09265	14.8232	99.6979	38.22	0.0212477
	24	3	6.16413	0.0373864	0.2225	0.815448	13.6468	98.9814	38.2527	0.050278
	15	3	6.13549	0.0457984	0.1275	0.631095	11.1402	99.4459	38.2535	0.0630942
	08	3	6.15077	0.0322669	0.1612	1.59715	15.812	99.2673	38.2794	0.0262543
	09	3	6.18622	0.0360057	0.2736	0.856948	14.1701	98.7389	38.2953	0.0461282
	04	3	6.14145	0.0357811	0.0628	0.560694	14.259	99.7446	38.404	0.0674028
	Mean age ± 1s			n=21	MSWD=4.49		13.9 ±5.8		38.1663	0.0156425
	Tc, DetritalSanidine, J=0.0035154±0.03%, IC=0.9914381±0.0010057, NM-316C, Lab#=68403, Argus VI
	128	3	1.86138	0.0157371	0.0206	2.903	32.4205	99.7409	11.8571	0.0112733
x	127	3	4.34279	0.0133106	0.0371	0.388922	38.3307	99.772	27.6213	0.0899828
x	51	3	4.42655	0.0064011	0.0202	10.7991	79.7057	99.8766	28.18	0.0071817
x	173	3.5	5.99458	0.0688557	4.929	0.0691095	7.40976	75.7676	28.9592	0.607895
x	130	3	4.70762	0.029192	0.4008	0.0946756	17.4775	97.5288	29.2599	0.375645
x	188	3.5	5.18422	-0.0007848	1.5796	0.21264	-	90.9823	30.0568	0.194253
x	139	3.5	5.55499	0.0011792	2.7281	0.154723	432.67	85.4676	30.2558	0.332059
x	45	3	4.83049	0.0273756	0.2812	0.0986945	18.6372	98.3221	30.2608	0.318472
x	246	3.5	4.99739	0.0223452	0.7242	0.135371	22.8328	95.7447	30.4854	0.271381
x	244	3.5	5.55357	0.0918832	1.9615	0.0438798	5.55275	89.682	31.7288	0.918478
x	30	3	5.17255	0.020443	0.0948	0.354976	24.9574	99.4892	32.7692	0.0869425
x	199	3.5	5.24751	0.0030533	0.1879	0.25531	167.099	98.9445	33.0597	0.149997
x	54	3	5.34163	0.0419033	0.403	0.257311	12.1757	97.8323	33.2742	0.153149
x	71	3	5.28202	0.005926	0.0764	0.521442	86.0958	99.5806	33.4875	0.0706285
x	41	3	5.29615	0.004125	0.0852	0.477699	123.686	99.5298	33.5594	0.0789744
x	112	3	5.45697	0.0067652	0.6254	1.2789	75.416	96.6184	33.5685	0.0377256
x	46	3	5.28819	0.0062302	0.0514	0.33985	81.8921	99.7209	33.5732	0.103116
x	146	3.5	5.81562	0.0109047	1.8323	0.4088	46.7875	90.6947	33.5843	0.12255
x	29	3	5.319	0.0073273	0.0749	0.694602	69.6306	99.5942	33.7248	0.0500551
x	149	3.5	5.89468	0.0241341	1.9772	0.229509	21.1404	90.1088	33.8197	0.195558
x	96	3	5.40699	0.0148458	0.2226	0.347572	34.3669	98.8034	34.0088	0.11073
x	87	3	5.36244	0.018797	0.073	0.515003	27.1428	99.6256	34.009	0.0664237
x	72	3	5.38509	0.0090754	0.1467	0.171974	56.2183	99.2068	34.0091	0.203154
x	52	3	5.40269	0.0112341	0.1923	0.741795	45.4157	98.9635	34.0365	0.0501561
x	236	3.5	5.65892	0.0051907	1.0244	0.859753	98.2919	94.6506	34.0986	0.0599383
x	152	3.5	5.42187	0.011007	0.2039	0.595735	46.3527	98.9034	34.1358	0.0795161
x	43	3	5.57036	0.0147436	0.7072	0.261746	34.6051	96.2645	34.1364	0.148372
x	210	3.5	5.47336	0.0114885	0.3236	0.235038	44.41	98.2663	34.2375	0.17682
x	115	3	5.43747	0.0136903	0.1724	0.691592	37.2676	99.0827	34.2948	0.0555786
x	92	3	5.41338	0.0089073	0.087	0.860145	57.2793	99.5373	34.2991	0.0436939
x	17	3	5.40802	0.0354367	0.0363	0.13457	14.3976	99.8543	34.3741	0.267197
x	186	3.5	5.78252	0.0115402	1.2701	0.2145	44.211	93.5158	34.4237	0.237253
x	111	3	5.48374	-0.0007288	0.1993	0.217676	-	98.9227	34.5286	0.163693
x	164	3.5	6.93542	0.0076436	5.0866	0.0506886	66.7492	78.3146	34.5821	0.847734
x	104	3	5.51281	0.023124	0.2682	0.0556139	22.0638	98.5941	34.5965	0.597294
x	156	3.5	5.73413	0.0068159	0.9195	0.497141	74.855	95.2645	34.7702	0.101782
x	65	3	5.57633	0.0197742	0.3885	0.393055	25.8015	97.967	34.7715	0.0978113
x	230	3.5	5.54245	0.0078334	0.2251	0.690793	65.1319	98.8102	34.8563	0.0662116
x	50	3	5.52291	0.0075656	0.0944	0.862404	67.4373	99.5052	34.9763	0.0490593
x	42	3	21.1236	0.0058691	52.8477	0.364199	86.9305	26.045	35.0517	0.443827
x	151	3.5	5.66029	0.0095903	0.4899	0.521866	53.2	97.4525	35.1069	0.0848125
x	204	3.5	8.29118	0.0272517	9.3853	0.120766	18.7219	66.5469	35.1319	0.609906
x	140	3.5	5.86879	0.0379469	1.1595	0.404093	13.4452	94.2058	35.1891	0.126143
x	121	3	5.59681	0.0115266	0.2176	0.49814	44.2632	98.8661	35.2152	0.0755244
x	16	3	5.64441	0.0278904	0.3781	0.0930614	18.2932	98.0566	35.2246	0.3981
x	103	3	5.63935	0.0972733	0.3884	0.212486	5.24506	98.1409	35.2249	0.190544
x	94	3	5.61547	0.0040875	0.2357	0.200282	124.821	98.7639	35.2952	0.180802
x	105	3	5.71349	0.0002236	0.5252	0.273855	2281.77	97.2803	35.3719	0.138861
x	245	3.5	5.78156	0.0119191	0.7045	0.166027	42.8056	96.4105	35.4732	0.228095
x	117	3	5.58281	0.0117149	0.0255	1.08811	43.5517	99.8819	35.4852	0.0349686
x	136	3.5	6.47436	0.0422328	3.0385	0.108104	12.0808	86.1673	35.5091	0.475534
x	194	3.5	5.61115	0.0225736	0.1115	0.904162	22.6018	99.4446	35.5095	0.0492465
x	113	3	5.74294	0.0256264	0.5029	0.20417	19.9093	97.4446	35.6128	0.177798
x	132	3	5.72634	0.0079065	0.2446	0.108936	64.5297	98.7477	35.9805	0.343813
x	176	3.5	7.12588	-0.0065042	4.9129	0.113605	-	79.5982	36.0999	0.432441
x	61	3	5.75607	0.0155463	0.247	0.175196	32.8184	98.7522	36.1676	0.220424
x	99	3	5.7235	0.0122682	0.133	0.445172	41.5875	99.3299	36.1729	0.0841868
x	116	3	5.71941	0.015553	0.0558	0.650504	32.8042	99.7332	36.2927	0.0577058
x	32	3	5.81186	0.0415161	0.329	0.240637	12.2893	98.3825	36.3804	0.147723
x	165	3.5	6.41587	0.215918	2.4044	0.0545411	2.36296	89.183	36.4147	0.835823
x	189	3.5	7.85486	1.20791	7.552	0.034685	0.422386	72.8137	36.4319	1.26738
x	82	3	5.84445	0.0376769	0.3567	0.182894	13.5416	98.2465	36.5325	0.204264
x	90	3	5.78617	0.0166285	0.1469	0.303677	30.6825	99.272	36.5446	0.119027
x	232	3.5	5.91016	0.0068236	0.558	0.206627	74.7705	97.2159	36.5553	0.201742
x	212	3.5	5.76819	0.0142909	0.0741	0.817987	35.7013	99.6395	36.5655	0.0492104
x	03	3	5.87418	0.0195424	0.4269	0.0903719	26.1075	97.8766	36.5794	0.391568
x	20	3	5.76294	0.0142484	0.0382	0.376028	35.8078	99.8237	36.5993	0.0927459
x	158	3.5	5.99	0.0005064	0.8016	0.149838	1007.51	96.0424	36.6019	0.300528
x	49	3	5.99268	0.0211401	0.8136	0.97875	24.1344	96.0114	36.6069	0.0535069
x	73	3	5.82894	0.0220207	0.2549	0.181589	23.1693	98.7365	36.6159	0.19542
x	31	3	5.80156	0.012218	0.1443	0.189272	41.7584	99.2811	36.6442	0.200725
x	36	3	5.7679	0.0219662	0.0331	0.363913	23.2268	99.861	36.6443	0.101239
x	15	3	5.77846	0.0142652	0.0647	0.63693	35.7656	99.6884	36.6478	0.0625518
x	10	3	5.76178	0.0255179	0.0115	0.488589	19.994	99.9767	36.6478	0.0764784
x	243	3.5	5.83028	0.0178446	0.238	0.329148	28.5915	98.8167	36.6536	0.12574
x	237	3.5	6.08502	0.0286571	1.0935	0.295506	17.8038	94.7209	36.6717	0.16447
x	228	3.5	5.82396	0.0226995	0.2085	0.626396	22.4764	98.9887	36.6775	0.0739692
x	174	3.5	5.85432	0.0167394	0.3008	0.62245	30.4792	98.503	36.6878	0.080353
x	02	3	5.78433	0.0190198	0.0636	0.595688	26.8249	99.7011	36.6895	0.0677565
x	124	3	5.77759	0.0049438	0.03	0.686008	103.201	99.8531	36.7021	0.0599887
x	37	3	5.78761	0.0135817	0.066	0.393939	37.5655	99.6819	36.703	0.0912549
x	05	3	5.78872	0.0197836	0.0682	0.330576	25.7892	99.6791	36.7091	0.10957
x	187	3.5	5.88396	0.0037202	0.384	0.408632	137.144	98.0737	36.7124	0.100566
x	77	3	5.83464	0.0462369	0.2214	0.217888	11.0346	98.9417	36.7274	0.177764
x	168	3.5	5.95599	0.0170546	0.6018	0.375166	29.9159	97.0334	36.7681	0.120553
x	23	3	5.8018	0.0155157	0.0756	0.264991	32.8831	99.6356	36.7753	0.149337
x	147	3.5	5.97127	0.0290086	0.6517	0.392865	17.588	96.8099	36.7778	0.110478
x	07	3	5.84644	0.0236324	0.2273	0.475161	21.5892	98.8821	36.7786	0.0802082
x	221	3.5	5.83144	0.0310803	0.1762	0.417256	16.4157	99.1497	36.7835	0.0980059
x	62	3	5.82933	0.0161708	0.1606	0.383692	31.5509	99.207	36.791	0.0981555
x	163	3.5	5.92026	0.0237064	0.4681	0.280316	21.5218	97.6913	36.7949	0.170522
x	143	3.5	5.97537	0.0303188	0.6514	0.415247	16.828	96.8162	36.8053	0.111432
x	109	3	5.81138	0.0223424	0.0926	0.224339	22.8357	99.5601	36.8081	0.154306
x	95	3	5.79052	0.015505	0.0195	0.561634	32.9058	99.922	36.8089	0.0645629
x	06	3	5.88299	0.0141827	0.3302	0.843824	35.9737	98.3587	36.8124	0.0479463
x	64	3	5.79757	0.0144447	0.0394	0.36341	35.3212	99.819	36.8157	0.0968043
x	175	3.5	5.84638	0.0262863	0.2071	0.243074	19.4095	98.989	36.8176	0.178041
x	182	3.5	5.94252	0.009223	0.5228	0.480684	55.3187	97.4095	36.8263	0.0852204
x	183	3.5	5.84852	0.0152822	0.1938	0.373466	33.3855	99.0402	36.8496	0.107131
x	155	3.5	6.13653	0.0082591	1.1648	0.304944	61.7748	94.3948	36.8528	0.167666
x	38	3	5.79895	0.0160416	0.0186	0.729611	31.8051	99.9274	36.864	0.0512343
x	33	3	6.00795	0.0155576	0.725	1.28714	32.7945	96.4505	36.8655	0.0397436
x	53	3	5.89957	0.0183594	0.3533	0.771623	27.7898	98.2533	36.8761	0.0602388
x	102	3	5.8156	0.0140023	0.0679	0.600239	36.4372	99.6741	36.8761	0.061076
x	249	3.5	6.7119	-0.0132624	3.0891	0.0956948	-	86.3672	36.8836	0.471879
x	223	3.5	5.84596	-0.0010529	0.1528	0.332071	-	99.2251	36.9012	0.127226
x	25	3	5.8051	0.0160364	0.019	0.869725	31.8154	99.9258	36.9022	0.0489763
x	207	3.5	6.01867	0.0275587	0.7439	0.220128	18.5134	96.3798	36.9042	0.204511
x	231	3.5	6.12652	0.0165142	1.1055	0.3497	30.8949	94.6825	36.9045	0.139856
x	39	3	5.81394	0.0219986	0.0446	0.500879	23.1926	99.8038	36.9133	0.0671842
x	34	3	5.82886	0.0031712	0.0888	0.652056	160.887	99.5533	36.9149	0.0554957
x	203	3.5	6.01637	0.0158516	0.718	0.296932	32.1863	96.491	36.932	0.149131
x	119	3	5.91131	0.0137102	0.3591	0.453571	37.2135	98.2211	36.9368	0.0888171
x	169	3.5	7.30929	0.0745352	5.105	0.146168	6.84514	79.423	36.9421	0.373876
x	179	3.5	6.01232	0.0201419	0.6952	0.306396	25.3305	96.6056	36.9509	0.152514
x	200	3.5	5.98206	0.0101679	0.5862	0.190432	50.1779	97.1132	36.9575	0.219763
x	40	3	5.87368	0.0486714	0.2289	0.570851	10.4826	98.9295	36.9666	0.084935
x	141	3.5	5.96174	0.0255939	0.5169	0.304044	19.9346	97.4696	36.9673	0.160443
x	44	3	5.84924	0.0322695	0.1357	0.247649	15.8107	99.3582	36.9716	0.146843
x	166	3.5	6.23926	0.0502027	1.4543	0.375615	10.1629	93.1685	36.9836	0.137706
x	180	3.5	6.08633	0.0290893	0.9139	0.387016	17.5392	95.596	37.015	0.126543
x	172	3.5	5.88297	0.0152388	0.2172	0.346085	33.4806	98.9286	37.0234	0.131942
x	09	3	5.84881	0.029085	0.1012	0.217752	17.5418	99.529	37.0318	0.169903
x	12	3	5.84249	0.0158844	0.0741	0.200513	32.1198	99.6464	37.035	0.187666
x	145	3.5	5.95416	-0.0022825	0.4463	0.344786	-	97.7785	37.0358	0.124772
x	118	3	5.82599	0.0241914	0.0192	0.466158	21.0903	99.9364	37.0379	0.0822018
x	74	3	6.17039	0.0470561	1.1881	0.213811	10.8425	94.3649	37.0438	0.193497
x	238	3.5	6.17137	0.0131683	1.1779	0.396808	38.7449	94.3698	37.0507	0.118574
x	04	3	5.852	0.0413698	0.1025	0.349168	12.3328	99.5392	37.0558	0.110518
x	205	3.5	6.33836	0.0101716	1.7396	0.105198	50.1597	91.8936	37.0559	0.422403
x	75	3	5.84183	0.0099869	0.0457	0.277666	51.0873	99.7819	37.0805	0.133046
x	48	3	5.86773	0.0075409	0.1038	0.709253	67.6582	99.4871	37.1345	0.061281
x	108	3	5.89325	0.0331785	0.192	0.221829	15.3775	99.0827	37.1452	0.167128
x	126	3	5.93191	0.0034728	0.3096	0.558633	146.914	98.4601	37.1534	0.0731405
x	192	3.5	6.33695	0.025467	1.6816	0.15424	20.0339	92.1819	37.1632	0.248029
x	98	3	5.87369	0.0140659	0.1077	1.03597	36.2724	99.4767	37.1682	0.0404348
x	191	3.5	6.11597	0.0103828	0.9107	0.26957	49.1393	95.6086	37.198	0.151919
x	222	3.5	6.13495	0.0529863	0.9806	0.193531	9.62898	95.3419	37.2105	0.227888
x	26	3	5.8609	0.0129714	0.0412	1.31682	39.333	99.81	37.2109	0.0321405
x	120	3	5.86367	0.0146955	0.0248	0.813472	34.7184	99.8952	37.2599	0.0459918
x	55	3	5.87477	0.0304528	0.0658	0.323373	16.7539	99.7106	37.2619	0.130322
x	170	3.5	6.17242	0.0641166	1.0817	0.224908	7.95744	94.8997	37.2642	0.207935
x	195	3.5	5.95552	0.0135338	0.3312	0.180121	37.6985	98.3716	37.267	0.2167
x	184	3.5	5.98195	0.0274769	0.4247	0.643224	18.5685	97.9365	37.2674	0.0709329
x	160	3.5	6.09832	-0.0086395	0.7944	0.102954	-	96.1331	37.2926	0.43405
x	148	3.5	6.2323	0.0020071	1.2394	0.171207	254.2	94.1176	37.314	0.235448
x	57	3	6.04616	0.0521459	0.6184	0.427587	9.78416	97.0437	37.3246	0.10623
x	35	3	5.91558	0.0165018	0.1655	0.678918	30.9181	99.1944	37.3259	0.0547318
x	69	3	6.42402	0.153946	1.9252	0.0876149	3.31416	91.326	37.3262	0.465376
x	125	3	5.90822	0.0078945	0.1347	0.5435	64.6278	99.3355	37.3321	0.0700458
x	161	3.5	7.01268	0.0108819	3.8728	0.158306	46.8856	83.674	37.3327	0.339021
x	13	3	5.89619	0.0354987	0.069	0.915937	14.3725	99.7025	37.3937	0.0454554
x	178	3.5	5.97447	0.0145166	0.3239	0.55142	35.1462	98.4156	37.4011	0.0848677
x	85	3	5.92478	0.0187203	0.1543	0.190668	27.2541	99.2548	37.4059	0.183118
x	91	3	5.97217	0.0123353	0.3011	0.295419	41.3613	98.5244	37.4277	0.137337
x	190	3.5	6.14452	0.0043637	0.8707	0.37356	116.92	95.813	37.4491	0.114908
x	177	3.5	6.02004	0.0709404	0.4564	0.120929	7.19201	97.852	37.4717	0.365577
x	215	3.5	6.01102	0.0051543	0.4043	0.442718	98.9861	98.0166	37.4767	0.0983702
x	135	3.5	5.98022	0.0470496	0.3097	0.263385	10.844	98.5311	37.4811	0.177034
x	89	3	6.06754	0.0788861	0.6135	0.432085	6.4676	97.1142	37.4831	0.0884906
x	171	3.5	6.13935	0.0110718	0.833	0.302785	46.0814	95.9997	37.4902	0.161871
x	59	3	5.98754	0.0020724	0.3148	0.260607	246.19	98.4476	37.494	0.157677
x	133	3	5.9969	0.0114537	0.341	0.224645	44.5449	98.3326	37.5089	0.169397
x	110	3	6.02568	0.0099823	0.4338	0.544888	51.1109	97.8827	37.5166	0.0761977
x	234	3.5	5.96591	0.0047281	0.227	0.288127	107.909	98.8804	37.5224	0.148695
x	19	3	6.13574	0.147946	0.842	0.137858	3.44857	96.1353	37.5242	0.291165
x	100	3	6.06503	0.305837	0.6382	0.185068	1.66822	97.2973	37.5434	0.212564
x	248	3.5	6.04238	-0.0111522	0.4691	0.118505	-	97.6839	37.5435	0.356727
x	24	3	5.93326	0.0250276	0.1001	0.303208	20.3857	99.5354	37.564	0.131195
x	214	3.5	6.11694	-0.0046677	0.7037	0.367795	-	96.5894	37.5813	0.118807
x	68	3	5.93141	0.0087957	0.0797	0.7008	58.0061	99.6144	37.5815	0.0576253
x	60	3	5.93171	0.0526329	0.0871	0.136486	9.69363	99.6382	37.5934	0.265978
x	88	3	5.93463	0.0089853	0.0839	0.530536	56.7821	99.5939	37.5941	0.0750128
x	66	3	5.93068	0.0045632	0.0614	0.346952	111.808	99.7003	37.6089	0.114304
x	63	3	5.99464	0.097455	0.3021	0.10807	5.23528	98.6437	37.6145	0.349254
x	138	3.5	5.94931	0.0070849	0.1212	0.783161	72.0129	99.4069	37.6161	0.0659275
x	56	3	5.94707	0.0098825	0.1081	0.378219	51.627	99.4762	37.6281	0.104872
x	142	3.5	6.08561	0.0051596	0.5647	0.299746	98.8844	97.263	37.6488	0.159581
x	137	3.5	6.01552	0.0129176	0.3253	0.292344	39.4968	98.4176	37.6566	0.149358
x	97	3	5.98351	0.0100172	0.2136	0.443964	50.9328	98.9574	37.6612	0.0828111
x	233	3.5	5.98241	0.006585	0.2001	0.450099	77.4797	99.0186	37.6773	0.105624
x	123	3	5.9769	0.007481	0.1791	0.324739	68.2	99.1233	37.6824	0.128529
x	154	3.5	6.10283	0.0116423	0.604	0.325244	43.8233	97.0875	37.6871	0.150299
x	224	3.5	6.08368	0.0052851	0.5309	0.119981	96.5363	97.426	37.6995	0.34724
x	81	3	5.93592	0.0089217	0.0247	0.221651	57.1869	99.8904	37.7129	0.166465
x	250	3.5	6.1608	0.007063	0.7653	0.155876	72.2362	96.3342	37.7497	0.276025
x	252	3.5	6.24763	0.0044747	1.0497	0.349908	114.02	95.0348	37.7658	0.127486
x	193	3.5	5.98796	0.0124815	0.149	0.909308	40.8768	99.2806	37.8109	0.0446409
x	107	3	5.96491	0.0150336	0.0718	0.447721	33.9376	99.6648	37.811	0.0775351
x	28	3	5.98991	0.0051739	0.1445	0.231899	98.6111	99.2931	37.8276	0.164245
x	144	3.5	6.11392	0.0131555	0.5617	0.641454	38.7826	97.2991	37.8365	0.0782246
x	251	3.5	6.12206	0.0117679	0.5884	0.27265	43.3556	97.1719	37.8374	0.151254
x	70	3	5.97634	0.0145271	0.0666	0.754573	35.1208	99.6899	37.8922	0.0505259
x	209	3.5	6.05353	0.0028817	0.3206	0.335429	177.05	98.4369	37.8995	0.135576
x	86	3	6.04991	0.0201227	0.297	0.200398	25.3546	98.5741	37.9297	0.193008
x	235	3.5	7.04202	0.064737	3.6632	0.0780217	7.88118	84.6855	37.9374	0.555577
x	27	3	5.97436	0.0143781	-0.0012425	1.05857	35.4848	100.026	38.006	0.0349766
x	197	3.5	5.9711	0.0125709	-0.02	0.441357	40.5861	100.116	38.0193	0.0863046
x	11	3	6.0325	0.01158	0.1798	0.37903	44.0591	99.1337	38.0338	0.106529
x	218	3.5	6.4231	0.0222909	1.496	0.181827	22.8884	93.1369	38.05	0.242219
x	201	3.5	7.76062	0.0116069	5.9651	0.0724125	43.957	77.2783	38.1522	0.628553
x	219	3.5	6.26166	0.0107215	0.888	0.138132	47.587	95.8188	38.159	0.312559
x	167	3.5	6.2871	0.0079499	0.9484	0.183005	64.1774	95.5507	38.2064	0.302277
x	239	3.5	7.26725	0.0091611	4.2554	0.179731	55.6924	82.6873	38.2239	0.301362
x	67	3	6.40643	0.0069861	1.3174	0.308576	73.0313	93.9257	38.2697	0.138095
x	153	3.5	6.29131	0.0744347	0.9084	0.0938503	6.85438	95.8269	38.3429	0.590214
x	211	3.5	6.08068	0.0272514	0.1758	0.38803	18.7221	99.1802	38.353	0.106343
x	122	3	6.07145	-0.0004993	0.1268	0.135827	-	99.381	38.3713	0.276763
x	225	3.5	6.33818	0.0111253	0.983	0.167971	45.8598	95.4261	38.4644	0.25216
x	47	3	6.07965	0.0061505	0.0582	0.38937	82.9533	99.7245	38.5542	0.102871
x	185	3.5	6.89011	0.0117019	2.7815	0.121576	43.6001	88.0729	38.5944	0.358549
x	18	3	6.12734	0.0234733	0.128	0.0984839	21.7355	99.4131	38.7343	0.383151
x	83	3	6.10825	0.0105031	0.0247	0.503736	48.5765	99.8945	38.7994	0.0721518
x	227	3.5	6.34337	0.0113207	0.803	0.162859	45.0682	96.2696	38.8323	0.279908
x	150	3.5	5.75924	0.0024315	-1.1938	0.281758	209.831	106.138	38.8651	0.4086
x	80	3	6.38715	0.0165385	0.9106	0.116989	30.8495	95.8019	38.91	0.317693
x	226	3.5	6.31618	0.0097957	0.5809	0.165663	52.0845	97.33	39.0888	0.297758
x	14	3	6.31326	0.826289	0.5141	0.0237742	0.617464	98.6517	39.6176	2.2502
x	220	3.5	6.52237	0.0105292	0.6817	0.266065	48.4561	96.9209	40.1847	0.200478
x	242	3.5	6.40956	0.0072348	0.2386	0.293548	70.5208	98.9077	40.297	0.177604
x	93	3	6.306	0.577948	-0.0919	0.0410676	0.882785	101.185	40.5705	0.881988
x	129	3	10.4184	0.0298922	12.5923	0.0484778	17.0681	64.2793	42.5631	0.998508
x	213	3.5	6.98492	0.0259081	0.3262	0.234492	19.6928	98.6495	43.7631	0.2451
x	216	3.5	6.99937	0.131958	0.2966	0.162997	3.86641	98.9007	43.9661	0.306278
x	162	3.5	8.93661	0.831881	7.0548	0.0494381	0.613314	77.4117	43.9698	1.16245
x	22	3	7.27681	0.0208104	0.7118	0.627147	24.5168	97.13	44.8778	0.078898
x	106	3	7.13513	0.0089179	0.1106	0.165622	57.2112	99.5522	45.0973	0.246581
x	131	3	7.33977	0.0243251	0.6058	0.113219	20.9744	97.5854	45.4715	0.368768
x	159	3.5	12.0879	3.54019	16.9626	0.0236319	0.144118	60.9228	46.8669	7.082
x	21	3	8.0897	0.0862998	0.0568	0.27889	5.912	99.8787	51.2217	0.212178
x	76	3	8.76685	0.0118421	0.4561	0.274922	43.0839	98.4716	54.6768	0.278706
x	247	3.5	8.92779	0.0001058	0.6908	0.237432	4822.34	97.712	55.2429	0.263362
x	206	3.5	9.51316	0.0020112	0.4923	0.223055	253.681	98.4714	59.2604	0.317145
x	241	3.5	19.7486	0.0079948	0.7626	0.195727	63.817	98.8618	121.463	0.557281
	Maximum depositional age ± 1s				Analysis of crystal 128		n=1		11.8571	0.0112733
	Notes:
	Isotopic ratios corrected for blank, radioactive decay, and mass discrimination, not corrected for interfering reactions.
	Errors quoted for individual analyses include analytical error only, without interfering reaction or J uncertainties.
	Mean age is weighted mean age of Taylor (1982). Mean age error is weighted error
	of the mean (Taylor, 1982), multiplied by the root of the MSWD where MSWD>1, and also
	incorporates uncertainty in J factors and irradiation correction uncertainties.
	Decay constants and isotopic abundances after Steiger and Jäger (1977).
	# symbol preceding sample ID denotes analyses excluded from mean age calculations.
	Ages calculated relative to FC-2 Fish Canyon Tuff sanidine interlaboratory standard at 28.201 Ma
	Decay Constant (LambdaK (total)) = 5.543e-10/a
	Correction factors:
	(39Ar/37Ar)Ca = 0.000682 ± 0.000004
	(36Ar/37Ar)Ca = 0.0002761 ± 0.0000010
	(38Ar/39Ar)K = 0.0124
	(40Ar/39Ar)K = 0.008 ± 0.0005

## Sheet: Groundmass ratio data
	ID	Power	40Ar/39Ar	37Ar/39Ar	36Ar/39Ar	39ArK	K/Ca	40Ar*	39Ar	Age	±1s
		(Watts)			(x 10-3)	(x 10-15 mol)		(%)	(%)	(Ma)	(Ma)
	Tb, Groundmass, 5.2 mg, J=0.0034943±0.02%, IC=0.9987828±0.0006681, NM-316N, Lab#=68499-01, Helix MC
X	A	0.5	110.569	0.695815	355.56	0.697802	0.733246	5.02023	1.95278	35.1787	1.17597
X	B	0.8	265.931	2.68693	864.649	0.349499	0.189884	4.00103	2.93085	66.9402	2.47765
X	C	1.3	82.2845	2.57132	255.878	0.742329	0.198421	8.35607	5.00824	43.5306	0.928557
X	D	1.6	24.8912	2.30307	63.3333	1.49898	0.221533	25.5448	9.2031	40.2748	0.334936
X	E	1.9	12.9135	2.16201	23.4672	2.40901	0.235986	47.6344	15.9447	38.9614	0.140651
X	F	2.2	10.7961	1.8021	16.4935	3.57481	0.283117	56.1857	25.9487	38.4124	0.108762
X	G	2.6	8.85875	1.66069	10.1218	5.81374	0.307224	67.7374	42.2183	37.994	0.0689318
X	H	3	7.1263	1.3935	4.249	5.58308	0.366132	83.9586	57.8424	37.869	0.0453984
X	I	3.5	6.7103	1.39974	2.8846	3.11199	0.364498	88.9861	66.5513	37.792	0.0553524
	J	4	6.66206	1.85822	2.8969	2.08399	0.274567	89.4136	72.3833	37.7128	0.0773918
	K	6	6.74274	6.84849	4.7543	1.93395	0.0744987	87.4369	77.7954	37.4567	0.095364
	L	10	6.54917	7.38598	4.2327	4.57594	0.0690774	90.092	90.601	37.4982	0.0514219
	M	15	6.73426	7.54162	4.8857	3.35861	0.0676517	87.6845	100	37.5325	0.0688252
	Integrated age ± 1s			n=13		35.7337	0.15632		K2O=0.76%	38.353	0.0484213
	Plateau ± 1s		steps J-M	n=4	MSWD=2.14	11.9525	0.105±0.102		33.4487	37.5426	0.0503857

## Sheet: Intensity data
Argon isotope intensities and supporting data.							Conley, A., Ramirez, S.E., Ricketts, J.W., Langford, R.P., Pavlis, T.L., and Heizler, M.T., 2023, Reconstructing the erosional and tectonic record of Laramide contraction to Rio Grande rift extension, southern Indio Mountains, western Texas, USA: Geosphere, v. 19, https://doi.org/10.1130/GES02620.1
Run_ID	Sample	Run_Date	Run_Hour	Ar40_	Ar40_Er	Ar39_	Ar39_Er	Ar38_	Ar38_Er	Ar37_DecayCor	Ar37_DecayCorEr	Ar36_	Ar36_Er	Ar36_ICFactor	Ar36_ICFactorEr	Ar40_Bkgd	Ar40_BkgdEr	Ar39_Bkgd	Ar39_BkgdEr	Ar38_Bkgd	Ar38_BkgdEr	Ar37_Bkgd	Ar37_BkgdEr	Ar36_Bkgd	Ar36_BkgdEr	PctAr40Rad	PctAr40Rad_Er	Age	Age_Er	Age_Er_with_J_er	Ar39_Moles	Irrad	J	J_Er	37_Decay	39_Decay	Ca_39_Over_37	Ca_39_Over_37_Er	Ca_38_Over_37	Ca_38_Over_37_Er	Ca_36_Over_37	Ca_36_Over_37_Er	K_38_Over_39	K_38_Over_39_Er	K_40_Over_39	K_40_Over_39_Er	K_37_Over_39	K_37_Over_39_Er	P36Cl_Over_38Cl
68499-01A	Tb	2021-06-07	20.8833	308.767	0.0626141	2.79253	0.0086216	0.472179	0.005621	1.94309	0.02752	0.992914	0.00175	0.998783	0.0006681	0.42487	0.0246708	0.0268476	0.0033514	0.0025734	0.0017246	0.0053972	0.0045275	0.0020166	9.36e-05	5.02023	0.168726	35.1787	1.17597	1.17599	6.98134e-16	NM-316N	0.0034943	7.8372e-07	1.67854	1.00019	0.000682	4e-06	0.0001	2e-06	0.0002761	1e-06	0.0124	2e-05	0.008	0.0005	0.00015	1.5e-05	250
68499-01B	Tb	2021-06-07	21.0833	372.452	0.0680666	1.40056	0.0085182	0.419447	0.0057185	3.76321	0.0300759	1.21099	0.0018615	0.999404	0.0006331	0.4074	0.0232938	0.0268476	0.0033514	0.0025734	0.0017246	0.0053972	0.0045275	0.0019636	8.82e-05	4.00103	0.148829	66.9402	2.47765	2.47769	3.5014e-16	NM-316N	0.0034943	7.8372e-07	1.67882	1.00019	0.000682	4e-06	0.0001	2e-06	0.0002761	1e-06	0.0124	2e-05	0.008	0.0005	0.00015	1.5e-05	250
68499-01C	Tb	2021-06-07	21.2833	244.758	0.056182	2.97453	0.0081805	0.340102	0.0059317	7.64847	0.0286859	0.761116	0.0014693	1.00003	0.0006051	0.389883	0.0220403	0.0268476	0.0033514	0.0025734	0.0017246	0.0053972	0.0045275	0.0019105	8.3e-05	8.35607	0.178903	43.5306	0.928557	0.928607	7.43633e-16	NM-316N	0.0034943	7.8372e-07	1.67909	1.00019	0.000682	4e-06	0.0001	2e-06	0.0002761	1e-06	0.0124	2e-05	0.008	0.0005	0.00015	1.5e-05	250
68499-01D	Tb	2021-06-07	21.4833	149.48	0.0469513	6.00536	0.0085961	0.286616	0.005752	13.8307	0.0286806	0.380339	0.0010582	1.00065	0.0005853	0.372414	0.02094	0.0268476	0.0033514	0.0025734	0.0017246	0.0053972	0.0045275	0.0018575	7.82e-05	25.5448	0.211782	40.2748	0.334936	0.335055	1.50134e-15	NM-316N	0.0034943	7.8372e-07	1.67937	1.00019	0.000682	4e-06	0.0001	2e-06	0.0002761	1e-06	0.0124	2e-05	0.008	0.0005	0.00015	1.5e-05	250
68499-01E	Tb	2021-06-07	21.6833	124.618	0.0439682	9.65027	0.0092616	0.27339	0.0056446	20.864	0.0288252	0.226465	0.0006901	1.00127	0.0005743	0.35492	0.0200128	0.0268476	0.0033514	0.0025734	0.0017246	0.0053972	0.0045275	0.0018044	7.38e-05	47.6344	0.168492	38.9614	0.140651	0.140917	2.41257e-15	NM-316N	0.0034943	7.8372e-07	1.67965	1.00019	0.000682	4e-06	0.0001	2e-06	0.0002761	1e-06	0.0124	2e-05	0.008	0.0005	0.00015	1.5e-05	250
68499-01F	Tb	2021-06-07	21.8833	154.566	0.0463453	14.3168	0.0092263	0.303511	0.0058475	25.8004	0.0295071	0.236135	0.0008026	1.00189	0.0005728	0.337403	0.0192846	0.0268476	0.0033514	0.0025734	0.0017246	0.0053972	0.0045275	0.0017513	7e-05	56.1857	0.157534	38.4124	0.108762	0.109096	3.57921e-15	NM-316N	0.0034943	7.8372e-07	1.67992	1.00019	0.000682	4e-06	0.0001	2e-06	0.0002761	1e-06	0.0124	2e-05	0.008	0.0005	0.00015	1.5e-05	250
68499-01G	Tb	2021-06-07	22.0833	206.243	0.0515371	23.2813	0.0101528	0.404093	0.0051787	38.6631	0.0292283	0.235649	0.0008207	1.00253	0.0005812	0.319471	0.0187711	0.0268476	0.0033514	0.0025734	0.0017246	0.0053972	0.0045275	0.0016969	6.66e-05	67.7374	0.121834	37.994	0.0689318	0.0694458	5.82033e-15	NM-316N	0.0034943	7.8372e-07	1.6802	1.00019	0.000682	4e-06	0.0001	2e-06	0.0002761	1e-06	0.0124	2e-05	0.008	0.0005	0.00015	1.5e-05	250
68499-01H	Tb	2021-06-07	22.2833	159.298	0.0425863	22.3536	0.0100164	0.323068	0.0057475	31.1497	0.0278819	0.0949796	0.0004852	1.00314	0.0005983	0.302221	0.0185167	0.0268476	0.0033514	0.0025734	0.0017246	0.0053972	0.0045275	0.0016445	6.41e-05	83.9586	0.0972601	37.869	0.0453984	0.0461701	5.58839e-15	NM-316N	0.0034943	7.8372e-07	1.68048	1.00019	0.000682	4e-06	0.0001	2e-06	0.0002761	1e-06	0.0124	2e-05	0.008	0.0005	0.00015	1.5e-05	250
68499-01I	Tb	2021-06-07	22.4667	83.6094	0.0420563	12.4599	0.009464	0.180099	0.0055195	17.4406	0.0297868	0.0359413	0.0002842	1.00374	0.0006225	0.285531	0.0185035	0.0268476	0.0033514	0.0025734	0.0017246	0.0053972	0.0045275	0.0015939	6.24e-05	88.9861	0.121665	37.792	0.0553524	0.0559846	3.11497e-15	NM-316N	0.0034943	7.8372e-07	1.68074	1.00019	0.000682	4e-06	0.0001	2e-06	0.0002761	1e-06	0.0124	2e-05	0.008	0.0005	0.00015	1.5e-05	250
68499-01J	Tb	2021-06-07	22.6667	55.605	0.0395724	8.34652	0.0089679	0.118643	0.0055619	15.5096	0.0297567	0.0241792	0.0002649	1.00433	0.0006536	0.26884	0.01872	0.0268476	0.0033514	0.0025734	0.0017246	0.0053972	0.0045275	0.0015433	6.15e-05	89.4136	0.170854	37.7128	0.0773918	0.0778433	2.08663e-15	NM-316N	0.0034943	7.8372e-07	1.681	1.00019	0.000682	4e-06	0.0001	2e-06	0.0002761	1e-06	0.0124	2e-05	0.008	0.0005	0.00015	1.5e-05	250
68499-01K	Tb	2021-06-07	22.85	52.4052	0.0371232	7.77209	0.0086412	0.132698	0.0057475	53.2271	0.0301408	0.0369505	0.0003314	1.00492	0.0006904	0.252198	0.0191568	0.0268476	0.0033514	0.0025734	0.0017246	0.0053972	0.0045275	0.0014928	6.13e-05	87.4369	0.211878	37.4567	0.095364	0.0957258	1.94302e-15	NM-316N	0.0034943	7.8372e-07	1.68127	1.00019	0.000682	4e-06	0.0001	2e-06	0.0002761	1e-06	0.0124	2e-05	0.008	0.0005	0.00015	1.5e-05	250
68499-01L	Tb	2021-06-07	23.0333	120.481	0.0441276	18.3964	0.0095481	0.347114	0.0056911	135.876	0.0333777	0.0778665	0.0004239	1.00551	0.0007321	0.235581	0.0197986	0.0268476	0.0033514	0.0025734	0.0017246	0.0053972	0.0045275	0.0014423	6.19e-05	90.092	0.120394	37.4982	0.0514219	0.0520914	4.59911e-15	NM-316N	0.0034943	7.8372e-07	1.68153	1.00019	0.000682	4e-06	0.0001	2e-06	0.0002761	1e-06	0.0124	2e-05	0.008	0.0005	0.00015	1.5e-05	250
68499-01M	Tb	2021-06-07	23.2333	90.9386	0.0413531	13.5039	0.0097389	0.257894	0.0058021	101.841	0.0346434	0.0659765	0.0004247	1.0061	0.0007782	0.218866	0.020632	0.0268476	0.0033514	0.0025734	0.0017246	0.0053972	0.0045275	0.0013916	6.34e-05	87.6845	0.154805	37.5325	0.0688252	0.0693278	3.37597e-15	NM-316N	0.0034943	7.8372e-07	1.68179	1.00019	0.000682	4e-06	0.0001	2e-06	0.0002761	1e-06	0.0124	2e-05	0.008	0.0005	0.00015	1.5e-05	250
68531-01	Thtr	2021-06-19	12.3	282.294	0.0365085	46.1802	0.0183098	0.553499	0.0057355	3.314	0.012163	0.0050805	0.000353	0.991438	0.0010057	0.910339	0.0147052	0.0329912	0.0048504	0.0093859	0.001358	0.0210684	0.0015522	0.0047721	0.0001478	99.5631	0.042858	38.159	0.0213446	0.0239361	2.30901e-15	NM-316P	0.0034655	9.9407e-07	2.11249	1.00027	0.000682	4e-06	0.0001	2e-06	0.0002761	1e-06	0.0124	2e-05	0.008	0.0005	0.00015	1.5e-05	250
68531-03	Thtr	2021-06-19	12.4667	308.041	0.0657501	50.5465	0.01905	0.633603	0.005844	1.7243	0.0143063	0.0026518	0.0002824	0.991438	0.0010057	0.911042	0.0137558	0.0329912	0.0048504	0.0093859	0.001358	0.0210684	0.0015522	0.0047487	0.0001383	99.7909	0.0422177	38.1287	0.0195704	0.0223643	2.52733e-15	NM-316P	0.0034655	9.9407e-07	2.11278	1.00027	0.000682	4e-06	0.0001	2e-06	0.0002761	1e-06	0.0124	2e-05	0.008	0.0005	0.00015	1.5e-05	250
68531-04	Thtr	2021-06-19	12.55	68.8712	0.0220433	11.2142	0.0146294	0.136979	0.0050469	0.401255	0.0146057	0.0007047	0.0002676	0.991438	0.0010057	0.911391	0.0133208	0.0329912	0.0048504	0.0093859	0.001358	0.0210684	0.0015522	0.0047371	0.000134	99.7446	0.124116	38.404	0.0674028	0.0682787	5.60708e-16	NM-316P	0.0034655	9.9407e-07	2.11293	1.00027	0.000682	4e-06	0.0001	2e-06	0.0002761	1e-06	0.0124	2e-05	0.008	0.0005	0.00015	1.5e-05	250
68531-05	Thtr	2021-06-19	12.65	183.555	0.0309707	29.5677	0.0157701	0.361306	0.0056238	1.95386	0.0157107	0.0124015	0.0004135	0.991438	0.0010057	0.911741	0.0129117	0.0329912	0.0048504	0.0093859	0.001358	0.0210684	0.0015522	0.0047254	0.0001299	98.0876	0.0716288	38.1787	0.033444	0.0351563	1.47838e-15	NM-316P	0.0034655	9.9407e-07	2.11308	1.00027	0.000682	4e-06	0.0001	2e-06	0.0002761	1e-06	0.0124	2e-05	0.008	0.0005	0.00015	1.5e-05	250
68531-06	Thtr	2021-06-19	12.7333	784.556	0.124935	128.582	0.0259698	1.59249	0.0054893	5.04567	0.0160023	0.0100591	0.0003754	0.991438	0.0010057	0.912093	0.0125302	0.0329912	0.0048504	0.0093859	0.001358	0.0210684	0.0015522	0.0047137	0.0001261	99.673	0.0290095	38.1301	0.011536	0.0158192	6.42909e-15	NM-316P	0.0034655	9.9407e-07	2.11323	1.00027	0.000682	4e-06	0.0001	2e-06	0.0002761	1e-06	0.0124	2e-05	0.008	0.0005	0.00015	1.5e-05	250
68531-07	Thtr	2021-06-19	12.8167	96.1802	0.0231542	15.7595	0.0169544	0.1968	0.0052062	0.530832	0.0131409	0.0012033	0.0002669	0.991438	0.0010057	0.912443	0.0121841	0.0329912	0.0048504	0.0093859	0.001358	0.0210684	0.0015522	0.004702	0.0001227	99.6747	0.0896348	38.1391	0.0520881	0.0532014	7.87975e-16	NM-316P	0.0034655	9.9407e-07	2.11338	1.00027	0.000682	4e-06	0.0001	2e-06	0.0002761	1e-06	0.0124	2e-05	0.008	0.0005	0.00015	1.5e-05	250
68531-08	Thtr	2021-06-19	12.9	196.478	0.0323196	31.9436	0.0154061	0.406924	0.0056823	1.03072	0.0150469	0.0051494	0.0003041	0.991438	0.0010057	0.912791	0.0118745	0.0329912	0.0048504	0.0093859	0.001358	0.0210684	0.0015522	0.0046904	0.0001197	99.2673	0.0526056	38.2794	0.0262543	0.0284142	1.59718e-15	NM-316P	0.0034655	9.9407e-07	2.11353	1.00027	0.000682	4e-06	0.0001	2e-06	0.0002761	1e-06	0.0124	2e-05	0.008	0.0005	0.00015	1.5e-05	250
68531-09	Thtr	2021-06-19	12.9833	106.028	0.0257728	17.1394	0.0152641	0.221606	0.0055276	0.617116	0.0138538	0.0046894	0.0002783	0.991438	0.0010057	0.913141	0.0116024	0.0329912	0.0048504	0.0093859	0.001358	0.0210684	0.0015522	0.0046788	0.0001171	98.7389	0.085623	38.2953	0.0461282	0.0473918	8.56969e-16	NM-316P	0.0034655	9.9407e-07	2.11367	1.00027	0.000682	4e-06	0.0001	2e-06	0.0002761	1e-06	0.0124	2e-05	0.008	0.0005	0.00015	1.5e-05	250
68531-10	Thtr	2021-06-19	13.0667	255.921	0.0334808	41.8539	0.0172496	0.528321	0.0056957	1.44059	0.0135494	0.0030099	0.0003002	0.991438	0.0010057	0.913491	0.0113716	0.0329912	0.0048504	0.0093859	0.001358	0.0210684	0.0015522	0.0046671	0.0001149	99.6979	0.0409984	38.22	0.0212477	0.0238575	2.09269e-15	NM-316P	0.0034655	9.9407e-07	2.11382	1.00027	0.000682	4e-06	0.0001	2e-06	0.0002761	1e-06	0.0124	2e-05	0.008	0.0005	0.00015	1.5e-05	250
68531-11	Thtr	2021-06-19	13.3167	251.629	0.0318806	41.0137	0.0163287	0.508003	0.0052838	1.40732	0.0137382	0.0078131	0.0003295	0.991438	0.0010057	0.914525	0.0109536	0.0329912	0.0048504	0.0093859	0.001358	0.0210684	0.0015522	0.0046327	0.000111	99.1268	0.0441924	38.1303	0.0218395	0.0243748	2.05068e-15	NM-316P	0.0034655	9.9407e-07	2.11426	1.00027	0.000682	4e-06	0.0001	2e-06	0.0002761	1e-06	0.0124	2e-05	0.008	0.0005	0.00015	1.5e-05	250
68531-12	Thtr	2021-06-19	13.4	193.048	0.0553739	31.7042	0.0172122	0.387418	0.0062976	1.107	0.0146952	0.0009431	0.000251	0.991438	0.0010057	0.91488	0.0109068	0.0329912	0.0048504	0.0093859	0.001358	0.0210684	0.0015522	0.0046208	0.0001107	99.902	0.057134	38.1387	0.0275654	0.0296154	1.58521e-15	NM-316P	0.0034655	9.9407e-07	2.11441	1.00027	0.000682	4e-06	0.0001	2e-06	0.0002761	1e-06	0.0124	2e-05	0.008	0.0005	0.00015	1.5e-05	250
68531-13	Thtr	2021-06-19	13.5	210.395	0.0303468	34.4199	0.0160287	0.423442	0.005922	1.13738	0.0139017	0.0025029	0.000244	0.991438	0.0010057	0.915232	0.010911	0.0329912	0.0048504	0.0093859	0.001358	0.0210684	0.0015522	0.0046091	0.0001109	99.6919	0.0415643	38.2051	0.0228024	0.0252502	1.72099e-15	NM-316P	0.0034655	9.9407e-07	2.11456	1.00027	0.000682	4e-06	0.0001	2e-06	0.0002761	1e-06	0.0124	2e-05	0.008	0.0005	0.00015	1.5e-05	250
68531-15	Thtr	2021-06-19	13.6667	77.4439	0.0212618	12.6223	0.0165359	0.151717	0.0049829	0.578081	0.0129704	0.001609	0.0002568	0.991438	0.0010057	0.915934	0.0110683	0.0329912	0.0048504	0.0093859	0.001358	0.0210684	0.0015522	0.0045857	0.0001128	99.4459	0.106132	38.2535	0.0630942	0.0640219	6.31115e-16	NM-316P	0.0034655	9.9407e-07	2.11486	1.00027	0.000682	4e-06	0.0001	2e-06	0.0002761	1e-06	0.0124	2e-05	0.008	0.0005	0.00015	1.5e-05	250
68531-16	Thtr	2021-06-19	13.75	389.875	0.0394517	63.8201	0.0183853	0.793175	0.0059223	2.43227	0.0144472	0.004431	0.0002831	0.991438	0.0010057	0.916282	0.0112183	0.0329912	0.0048504	0.0093859	0.001358	0.0210684	0.0015522	0.0045741	0.0001145	99.7145	0.028291	38.1914	0.014478	0.0180874	3.191e-15	NM-316P	0.0034655	9.9407e-07	2.11501	1.00027	0.000682	4e-06	0.0001	2e-06	0.0002761	1e-06	0.0124	2e-05	0.008	0.0005	0.00015	1.5e-05	250
68531-17	Thtr	2021-06-19	13.8333	122.773	0.0247105	20.0519	0.0155036	0.254342	0.0058505	0.839884	0.015368	0.002289	0.0002652	0.991438	0.0010057	0.916632	0.0114142	0.0329912	0.0048504	0.0093859	0.001358	0.0210684	0.0015522	0.0045625	0.0001166	99.5041	0.0709025	38.1968	0.0389167	0.040399	1.0026e-15	NM-316P	0.0034655	9.9407e-07	2.11515	1.00027	0.000682	4e-06	0.0001	2e-06	0.0002761	1e-06	0.0124	2e-05	0.008	0.0005	0.00015	1.5e-05	250
68531-18	Thtr	2021-06-19	13.9167	190.095	0.0585517	31.1303	0.0179549	0.38476	0.0056265	0.8427	0.014796	0.0017607	0.0002655	0.991438	0.0010057	0.916984	0.0116552	0.0329912	0.0048504	0.0093859	0.001358	0.0210684	0.0015522	0.0045507	0.0001192	99.7619	0.0611544	38.1934	0.0294606	0.0313924	1.55651e-15	NM-316P	0.0034655	9.9407e-07	2.1153	1.00027	0.000682	4e-06	0.0001	2e-06	0.0002761	1e-06	0.0124	2e-05	0.008	0.0005	0.00015	1.5e-05	250
68531-20	Thtr	2021-06-19	14.0833	101.403	0.0245936	16.5745	0.0155491	0.202688	0.0057889	0.800324	0.013761	0.0016482	0.0002558	0.991438	0.0010057	0.917686	0.0122559	0.0329912	0.0048504	0.0093859	0.001358	0.0210684	0.0015522	0.0045273	0.0001256	99.5833	0.0829471	38.1976	0.0464618	0.0477104	8.28726e-16	NM-316P	0.0034655	9.9407e-07	2.1156	1.00027	0.000682	4e-06	0.0001	2e-06	0.0002761	1e-06	0.0124	2e-05	0.008	0.0005	0.00015	1.5e-05	250
68531-21	Thtr	2021-06-19	14.1833	276.893	0.0325107	45.1245	0.0186472	0.554177	0.0062782	1.29093	0.0132503	0.0083514	0.0003419	0.991438	0.0010057	0.918037	0.0126106	0.0329912	0.0048504	0.0093859	0.001358	0.0210684	0.0015522	0.0045156	0.0001293	99.1454	0.0417294	38.1431	0.021616	0.0241764	2.25623e-15	NM-316P	0.0034655	9.9407e-07	2.11575	1.00027	0.000682	4e-06	0.0001	2e-06	0.0002761	1e-06	0.0124	2e-05	0.008	0.0005	0.00015	1.5e-05	250
68531-22	Thtr	2021-06-19	14.2667	129.964	0.026044	21.2823	0.0167315	0.268794	0.0053001	0.682266	0.0146812	0.002137	0.000268	0.991438	0.0010057	0.918386	0.012995	0.0329912	0.0048504	0.0093859	0.001358	0.0210684	0.0015522	0.004504	0.0001333	99.5562	0.0682596	38.1168	0.0385231	0.040014	1.06412e-15	NM-316P	0.0034655	9.9407e-07	2.1159	1.00027	0.000682	4e-06	0.0001	2e-06	0.0002761	1e-06	0.0124	2e-05	0.008	0.0005	0.00015	1.5e-05	250
68531-23	Thtr	2021-06-19	14.35	204.818	0.0326899	33.6406	0.0173055	0.426991	0.0055625	1.07317	0.0133807	0.001986	0.0002846	0.991438	0.0010057	0.918756	0.0134352	0.0329912	0.0048504	0.0093859	0.001358	0.0210684	0.0015522	0.0044917	0.0001378	99.7558	0.0483198	38.0794	0.0257726	0.0279479	1.68203e-15	NM-316P	0.0034655	9.9407e-07	2.11606	1.00027	0.000682	4e-06	0.0001	2e-06	0.0002761	1e-06	0.0124	2e-05	0.008	0.0005	0.00015	1.5e-05	250
68531-24	Thtr	2021-06-19	14.4333	100.533	0.0214398	16.3094	0.0150543	0.202995	0.0052449	0.609749	0.0142062	0.0036286	0.0003112	0.991438	0.0010057	0.919106	0.0138785	0.0329912	0.0048504	0.0093859	0.001358	0.0210684	0.0015522	0.00448	0.0001424	98.9814	0.0970722	38.2527	0.050278	0.0514373	8.15469e-16	NM-316P	0.0034655	9.9407e-07	2.1162	1.00027	0.000682	4e-06	0.0001	2e-06	0.0002761	1e-06	0.0124	2e-05	0.008	0.0005	0.00015	1.5e-05	250
68403-02	Tc	2021-06-20	0.05	68.9141	0.0229254	11.9139	0.0167292	0.144234	0.0057156	0.2266	0.014034	0.0007579	0.000273	0.991438	0.0010057	0.815289	0.0159907	0.0329912	0.0048504	0.0093859	0.001358	0.0210684	0.0015522	0.0039707	0.000165	99.7011	0.126918	36.6895	0.0677565	0.0686616	5.95696e-16	NM-316C	0.0035154	1.0754e-06	2.13302	1.00027	0.000682	4e-06	0.0001	2e-06	0.0002761	1e-06	0.0124	2e-05	0.008	0.0005	0.00015	1.5e-05	250
68403-03	Tc	2021-06-20	0.15	10.6174	0.0292601	1.80746	0.0134407	0.0241887	0.0055329	0.0353222	0.0147488	0.0007717	0.0002568	0.991438	0.0010057	0.816647	0.01499	0.0329912	0.0048504	0.0093859	0.001358	0.0210684	0.0015522	0.0040008	0.0001549	97.8766	0.813388	36.5794	0.391568	0.391725	9.03732e-17	NM-316C	0.0035154	1.0754e-06	2.13319	1.00027	0.000682	4e-06	0.0001	2e-06	0.0002761	1e-06	0.0124	2e-05	0.008	0.0005	0.00015	1.5e-05	250
68403-04	Tc	2021-06-20	0.233333	40.8678	0.0201316	6.98356	0.0153191	0.0871903	0.0059267	0.288908	0.0147648	0.0007159	0.0002748	0.991438	0.0010057	0.818005	0.0140527	0.0329912	0.0048504	0.0093859	0.001358	0.0210684	0.0015522	0.0040308	0.0001456	99.5392	0.211189	37.0558	0.110518	0.111086	3.49178e-16	NM-316C	0.0035154	1.0754e-06	2.13334	1.00027	0.000682	4e-06	0.0001	2e-06	0.0002761	1e-06	0.0124	2e-05	0.008	0.0005	0.00015	1.5e-05	250
68403-05	Tc	2021-06-20	0.333333	38.2728	0.020012	6.6116	0.0146487	0.0806821	0.0063148	0.130801	0.0136836	0.0004508	0.000254	0.991438	0.0010057	0.819362	0.0131922	0.0329912	0.0048504	0.0093859	0.001358	0.0210684	0.0015522	0.0040609	0.0001372	99.6791	0.210221	36.7091	0.10957	0.110133	3.3058e-16	NM-316C	0.0035154	1.0754e-06	2.1335	1.00027	0.000682	4e-06	0.0001	2e-06	0.0002761	1e-06	0.0124	2e-05	0.008	0.0005	0.00015	1.5e-05	250
68403-06	Tc	2021-06-20	0.416667	99.2852	0.0256025	16.8767	0.0148167	0.208352	0.0068936	0.239357	0.0139511	0.0055724	0.0003098	0.991438	0.0010057	0.82072	0.0124247	0.0329912	0.0048504	0.0093859	0.001358	0.0210684	0.0015522	0.004091	0.00013	98.3587	0.0999054	36.8124	0.0479463	0.0492254	8.43832e-16	NM-316C	0.0035154	1.0754e-06	2.13367	1.00027	0.000682	4e-06	0.0001	2e-06	0.0002761	1e-06	0.0124	2e-05	0.008	0.0005	0.00015	1.5e-05	250
68403-07	Tc	2021-06-20	0.8	55.561	0.0384122	9.50338	0.0145195	0.114868	0.0057134	0.224588	0.0129148	0.0021605	0.0002634	0.991438	0.0010057	0.826242	0.0106467	0.0329912	0.0048504	0.0093859	0.001358	0.0210684	0.0015522	0.0042132	0.0001166	98.8821	0.171212	36.7786	0.0802082	0.0809779	4.75169e-16	NM-316C	0.0035154	1.0754e-06	2.13432	1.00027	0.000682	4e-06	0.0001	2e-06	0.0002761	1e-06	0.0124	2e-05	0.008	0.0005	0.00015	1.5e-05	250
68403-09	Tc	2021-06-20	0.933333	25.4723	0.0166895	4.35513	0.0154722	0.059511	0.0062242	0.126669	0.0132303	0.0004405	0.000248	0.991438	0.0010057	0.828456	0.0106989	0.0329912	0.0048504	0.0093859	0.001358	0.0210684	0.0015522	0.0042623	0.0001196	99.529	0.302863	37.0318	0.169903	0.170273	2.17757e-16	NM-316C	0.0035154	1.0754e-06	2.13458	1.00027	0.000682	4e-06	0.0001	2e-06	0.0002761	1e-06	0.0124	2e-05	0.008	0.0005	0.00015	1.5e-05	250
68403-10	Tc	2021-06-20	1.03333	56.3039	0.0400318	9.77196	0.014781	0.114524	0.0054259	0.24936	0.0123506	0.0001123	0.0002431	0.991438	0.0010057	0.829831	0.0109642	0.0329912	0.0048504	0.0093859	0.001358	0.0210684	0.0015522	0.0042927	0.0001238	99.9767	0.16314	36.6478	0.0764784	0.0772797	4.88598e-16	NM-316C	0.0035154	1.0754e-06	2.13474	1.00027	0.000682	4e-06	0.0001	2e-06	0.0002761	1e-06	0.0124	2e-05	0.008	0.0005	0.00015	1.5e-05	250
68403-11	Tc	2021-06-20	1.13333	45.7304	0.039067	7.58066	0.0156552	0.100215	0.0059513	0.0877838	0.013666	0.0013632	0.0002645	0.991438	0.0010057	0.831201	0.0113929	0.0329912	0.0048504	0.0093859	0.001358	0.0210684	0.0015522	0.004323	0.0001297	99.1337	0.209625	38.0338	0.106529	0.10715	3.79033e-16	NM-316C	0.0035154	1.0754e-06	2.1349	1.00027	0.000682	4e-06	0.0001	2e-06	0.0002761	1e-06	0.0124	2e-05	0.008	0.0005	0.00015	1.5e-05	250
68403-12	Tc	2021-06-20	1.21667	23.4302	0.0342478	4.01032	0.0151924	0.0471938	0.0060971	0.0637016	0.0132468	0.0002973	0.000245	0.991438	0.0010057	0.832558	0.0119622	0.0329912	0.0048504	0.0093859	0.001358	0.0210684	0.0015522	0.0043531	0.0001368	99.6464	0.372285	37.035	0.187666	0.188001	2.00516e-16	NM-316C	0.0035154	1.0754e-06	2.13506	1.00027	0.000682	4e-06	0.0001	2e-06	0.0002761	1e-06	0.0124	2e-05	0.008	0.0005	0.00015	1.5e-05	250
68403-13	Tc	2021-06-20	1.31667	108.013	0.0269589	18.3192	0.0172359	0.224155	0.0057128	0.650307	0.0148081	0.0012646	0.0002699	0.991438	0.0010057	0.833924	0.0126604	0.0329912	0.0048504	0.0093859	0.001358	0.0210684	0.0015522	0.0043833	0.0001452	99.7025	0.0828196	37.3937	0.0454554	0.0468445	9.15959e-16	NM-316C	0.0035154	1.0754e-06	2.13522	1.00027	0.000682	4e-06	0.0001	2e-06	0.0002761	1e-06	0.0124	2e-05	0.008	0.0005	0.00015	1.5e-05	250
68403-14	Tc	2021-06-20	1.48333	3.00354	0.0554783	0.475751	0.0180557	-0.0069404	0.0083319	0.393108	0.0229388	0.0002446	0.0003877	0.991438	0.0010057	0.835084	0.0132872	0.0329912	0.0048504	0.0093859	0.001358	0.0210684	0.0015522	0.0044142	0.0001525	98.6517	4.61948	39.6176	2.2502	2.25023	2.37876e-17	NM-316C	0.0035154	1.0754e-06	2.13552	1.00027	0.000682	4e-06	0.0001	2e-06	0.0002761	1e-06	0.0124	2e-05	0.008	0.0005	0.00015	1.5e-05	250
68403-15	Tc	2021-06-20	1.56667	73.6103	0.0409068	12.7387	0.0144805	0.153462	0.0052516	0.181721	0.0151857	0.0008246	0.0002888	0.991438	0.0010057	0.834653	0.0129626	0.0329912	0.0048504	0.0093859	0.001358	0.0210684	0.0015522	0.0044115	0.0001488	99.6884	0.140747	36.6478	0.0625518	0.0635289	6.36936e-16	NM-316C	0.0035154	1.0754e-06	2.13568	1.00027	0.000682	4e-06	0.0001	2e-06	0.0002761	1e-06	0.0124	2e-05	0.008	0.0005	0.00015	1.5e-05	250
68403-16	Tc	2021-06-20	1.66667	10.5057	0.0297477	1.86126	0.014263	0.0169271	0.0070835	0.0519114	0.01477	0.0007038	0.0002761	0.991438	0.0010057	0.834219	0.0126459	0.0329912	0.0048504	0.0093859	0.001358	0.0210684	0.0015522	0.0044087	0.0001452	98.0566	0.873502	35.2246	0.3981	0.398243	9.30632e-17	NM-316C	0.0035154	1.0754e-06	2.13584	1.00027	0.000682	4e-06	0.0001	2e-06	0.0002761	1e-06	0.0124	2e-05	0.008	0.0005	0.00015	1.5e-05	250
68403-17	Tc	2021-06-20	1.75	14.5555	0.0333987	2.69147	0.0152695	0.0297105	0.0060624	0.095377	0.013731	9.77e-05	0.0002404	0.991438	0.0010057	0.833787	0.012341	0.0329912	0.0048504	0.0093859	0.001358	0.0210684	0.0015522	0.004406	0.0001418	99.8543	0.587097	34.3741	0.267197	0.2674	1.34574e-16	NM-316C	0.0035154	1.0754e-06	2.136	1.00027	0.000682	4e-06	0.0001	2e-06	0.0002761	1e-06	0.0124	2e-05	0.008	0.0005	0.00015	1.5e-05	250
68403-18	Tc	2021-06-20	1.85	12.0691	0.0276754	1.96971	0.0142376	0.0257267	0.0053653	0.0462356	0.0161505	0.0002522	0.0002634	0.991438	0.0010057	0.833331	0.0120317	0.0329912	0.0048504	0.0093859	0.001358	0.0210684	0.0015522	0.0044031	0.0001383	99.4131	0.722523	38.7343	0.383151	0.38333	9.84855e-17	NM-316C	0.0035154	1.0754e-06	2.13617	1.00027	0.000682	4e-06	0.0001	2e-06	0.0002761	1e-06	0.0124	2e-05	0.008	0.0005	0.00015	1.5e-05	250
68403-19	Tc	2021-06-20	1.93333	16.9189	0.0296283	2.75743	0.0152252	0.0250212	0.0060437	0.407952	0.0154047	0.0023218	0.0002884	0.991438	0.0010057	0.832896	0.0117497	0.0329912	0.0048504	0.0093859	0.001358	0.0210684	0.0015522	0.0044003	0.0001352	96.1353	0.560189	37.5242	0.291165	0.291386	1.37872e-16	NM-316C	0.0035154	1.0754e-06	2.13633	1.00027	0.000682	4e-06	0.0001	2e-06	0.0002761	1e-06	0.0124	2e-05	0.008	0.0005	0.00015	1.5e-05	250
68403-20	Tc	2021-06-20	2.03333	43.341	0.0357818	7.52064	0.0134053	0.0921049	0.0057089	0.107157	0.0150815	0.0002875	0.0002389	0.991438	0.0010057	0.832464	0.0114827	0.0329912	0.0048504	0.0093859	0.001358	0.0210684	0.0015522	0.0043976	0.0001323	99.8237	0.201032	36.5993	0.0927459	0.093406	3.76032e-16	NM-316C	0.0035154	1.0754e-06	2.13649	1.00027	0.000682	4e-06	0.0001	2e-06	0.0002761	1e-06	0.0124	2e-05	0.008	0.0005	0.00015	1.5e-05	250
68403-21	Tc	2021-06-20	2.1	45.1253	0.026346	5.57812	0.0191318	0.0574372	0.0079623	0.481391	0.0190784	0.0003171	0.0003576	0.991438	0.0010057	0.832096	0.0112668	0.0329912	0.0048504	0.0093859	0.001358	0.0210684	0.0015522	0.0043952	0.0001299	99.8787	0.24872	51.2217	0.212178	0.21274	2.78906e-16	NM-316C	0.0035154	1.0754e-06	2.13663	1.00027	0.000682	4e-06	0.0001	2e-06	0.0002761	1e-06	0.0124	2e-05	0.008	0.0005	0.00015	1.5e-05	250
68403-22	Tc	2021-06-20	2.2	91.2738	0.0432843	12.5431	0.0153332	0.17428	0.0056408	0.261027	0.0137194	0.0089277	0.0003578	0.991438	0.0010057	0.831665	0.0110278	0.0329912	0.0048504	0.0093859	0.001358	0.0210684	0.0015522	0.0043925	0.0001274	97.13	0.133869	44.8778	0.078898	0.0800551	6.27156e-16	NM-316C	0.0035154	1.0754e-06	2.13679	1.00027	0.000682	4e-06	0.0001	2e-06	0.0002761	1e-06	0.0124	2e-05	0.008	0.0005	0.00015	1.5e-05	250
68403-23	Tc	2021-06-20	2.28333	30.7488	0.0365624	5.29988	0.0161087	0.0597967	0.0054244	0.0822313	0.0162133	0.0004007	0.0002562	0.991438	0.0010057	0.83123	0.0108028	0.0329912	0.0048504	0.0093859	0.001358	0.0210684	0.0015522	0.0043897	0.000125	99.6356	0.298648	36.7753	0.149337	0.149752	2.64994e-16	NM-316C	0.0035154	1.0754e-06	2.13695	1.00027	0.000682	4e-06	0.0001	2e-06	0.0002761	1e-06	0.0124	2e-05	0.008	0.0005	0.00015	1.5e-05	250
68403-24	Tc	2021-06-20	2.38333	35.9809	0.0192556	6.06427	0.0159635	0.0809623	0.00598	0.151774	0.0150547	0.000607	0.0002761	0.991438	0.0010057	0.830799	0.010597	0.0329912	0.0048504	0.0093859	0.001358	0.0210684	0.0015522	0.004387	0.0001229	99.5354	0.239623	37.564	0.131195	0.131687	3.03214e-16	NM-316C	0.0035154	1.0754e-06	2.13711	1.00027	0.000682	4e-06	0.0001	2e-06	0.0002761	1e-06	0.0124	2e-05	0.008	0.0005	0.00015	1.5e-05	250
68403-25	Tc	2021-06-20	2.46667	100.978	0.0242386	17.3947	0.0182572	0.22999	0.0053154	0.278948	0.0165095	0.0003302	0.00027	0.991438	0.0010057	0.830359	0.0104055	0.0329912	0.0048504	0.0093859	0.001358	0.0210684	0.0015522	0.0043842	0.000121	99.9258	0.0869795	36.9022	0.0489763	0.0502352	8.69734e-16	NM-316C	0.0035154	1.0754e-06	2.13727	1.00027	0.000682	4e-06	0.0001	2e-06	0.0002761	1e-06	0.0124	2e-05	0.008	0.0005	0.00015	1.5e-05	250
68403-26	Tc	2021-06-20	2.56667	154.356	0.0261375	26.3365	0.0182456	0.322236	0.0061496	0.341621	0.0149755	0.0010843	0.0002571	0.991438	0.0010057	0.829922	0.0102348	0.0329912	0.0048504	0.0093859	0.001358	0.0210684	0.0015522	0.0043814	0.0001194	99.81	0.0561127	37.2109	0.0321405	0.0340585	1.31683e-15	NM-316C	0.0035154	1.0754e-06	2.13743	1.00027	0.000682	4e-06	0.0001	2e-06	0.0002761	1e-06	0.0124	2e-05	0.008	0.0005	0.00015	1.5e-05	250
68403-27	Tc	2021-06-20	2.66667	126.486	0.028707	21.1716	0.0159303	0.262367	0.0065019	0.304406	0.0137782	-2.63e-05	0.0002087	0.991438	0.0010057	0.829484	0.0100848	0.0329912	0.0048504	0.0093859	0.001358	0.0210684	0.0015522	0.0043786	0.000118	100.026	0.0596474	38.006	0.0349766	0.0368207	1.05858e-15	NM-316C	0.0035154	1.0754e-06	2.1376	1.00027	0.000682	4e-06	0.0001	2e-06	0.0002761	1e-06	0.0124	2e-05	0.008	0.0005	0.00015	1.5e-05	250
68403-28	Tc	2021-06-20	2.75	27.7812	0.0373526	4.63799	0.0142348	0.0568655	0.0053283	0.0239964	0.0133357	0.0006701	0.0002629	0.991438	0.0010057	0.829048	0.0099568	0.0329912	0.0048504	0.0093859	0.001358	0.0210684	0.0015522	0.0043758	0.0001169	99.2931	0.338455	37.8276	0.164245	0.164644	2.319e-16	NM-316C	0.0035154	1.0754e-06	2.13776	1.00027	0.000682	4e-06	0.0001	2e-06	0.0002761	1e-06	0.0124	2e-05	0.008	0.0005	0.00015	1.5e-05	250
68403-29	Tc	2021-06-20	2.83333	73.8921	0.0200817	13.8921	0.0140412	0.166559	0.0061703	0.101791	0.0146467	0.0010403	0.0002649	0.991438	0.0010057	0.828619	0.0098524	0.0329912	0.0048504	0.0093859	0.001358	0.0210684	0.0015522	0.0043731	0.0001161	99.5942	0.113641	33.7248	0.0500551	0.0510882	6.94606e-16	NM-316C	0.0035154	1.0754e-06	2.13792	1.00027	0.000682	4e-06	0.0001	2e-06	0.0002761	1e-06	0.0124	2e-05	0.008	0.0005	0.00015	1.5e-05	250
68403-30	Tc	2021-06-20	2.93333	36.7231	0.0174392	7.09961	0.0132804	0.0852459	0.0059076	0.145138	0.0146564	0.0006734	0.0002282	0.991438	0.0010057	0.828187	0.0097703	0.0329912	0.0048504	0.0093859	0.001358	0.0210684	0.0015522	0.0043703	0.0001156	99.4892	0.196259	32.7692	0.0869425	0.0875084	3.54981e-16	NM-316C	0.0035154	1.0754e-06	2.13808	1.00027	0.000682	4e-06	0.0001	2e-06	0.0002761	1e-06	0.0124	2e-05	0.008	0.0005	0.00015	1.5e-05	250
68403-31	Tc	2021-06-20	3.01667	21.9616	0.0322831	3.78547	0.0153773	0.0472253	0.0065548	0.0462507	0.0160648	0.0005462	0.0002537	0.991438	0.0010057	0.827757	0.0097111	0.0329912	0.0048504	0.0093859	0.001358	0.0210684	0.0015522	0.0043676	0.0001154	99.2811	0.400039	36.6442	0.200725	0.201032	1.89273e-16	NM-316C	0.0035154	1.0754e-06	2.13823	1.00027	0.000682	4e-06	0.0001	2e-06	0.0002761	1e-06	0.0124	2e-05	0.008	0.0005	0.00015	1.5e-05	250
68403-32	Tc	2021-06-20	3.23333	27.9718	0.033209	4.81287	0.0137934	0.0477613	0.0057289	0.199812	0.0162896	0.0015833	0.000248	0.991438	0.0010057	0.826783	0.0096642	0.0329912	0.0048504	0.0093859	0.001358	0.0210684	0.0015522	0.0043614	0.0001159	98.3825	0.311127	36.3804	0.147723	0.148133	2.40644e-16	NM-316C	0.0035154	1.0754e-06	2.1386	1.00027	0.000682	4e-06	0.0001	2e-06	0.0002761	1e-06	0.0124	2e-05	0.008	0.0005	0.00015	1.5e-05	250
68403-33	Tc	2021-06-20	3.31667	154.663	0.0247764	25.7431	0.0179305	0.333424	0.0051174	0.400502	0.0134824	0.0186632	0.0004108	0.991438	0.0010057	0.82635	0.0096824	0.0329912	0.0048504	0.0093859	0.001358	0.0210684	0.0015522	0.0043586	0.0001166	96.4505	0.0825194	36.8655	0.0397436	0.041282	1.28716e-15	NM-316C	0.0035154	1.0754e-06	2.13876	1.00027	0.000682	4e-06	0.0001	2e-06	0.0002761	1e-06	0.0124	2e-05	0.008	0.0005	0.00015	1.5e-05	250
68403-34	Tc	2021-06-20	3.41667	76.0151	0.0191953	13.0412	0.0143172	0.163624	0.0063958	0.041356	0.0155582	0.0011584	0.0002589	0.991438	0.0010057	0.825913	0.0097249	0.0329912	0.0048504	0.0093859	0.001358	0.0210684	0.0015522	0.0043559	0.0001176	99.5533	0.107618	36.9149	0.0554957	0.0566105	6.52058e-16	NM-316C	0.0035154	1.0754e-06	2.13892	1.00027	0.000682	4e-06	0.0001	2e-06	0.0002761	1e-06	0.0124	2e-05	0.008	0.0005	0.00015	1.5e-05	250
68403-35	Tc	2021-06-20	3.5	80.3249	0.0238319	13.5785	0.0150735	0.161746	0.0060871	0.22407	0.0141758	0.0022478	0.0002499	0.991438	0.0010057	0.825481	0.0097907	0.0329912	0.0048504	0.0093859	0.001358	0.0210684	0.0015522	0.0043531	0.0001188	99.1944	0.101833	37.3259	0.0547318	0.0558867	6.78926e-16	NM-316C	0.0035154	1.0754e-06	2.13908	1.00027	0.000682	4e-06	0.0001	2e-06	0.0002761	1e-06	0.0124	2e-05	0.008	0.0005	0.00015	1.5e-05	250
68403-36	Tc	2021-06-20	3.6	41.9809	0.033598	7.27837	0.0147792	0.0914858	0.0057397	0.159879	0.0156785	0.0002411	0.0002453	0.991438	0.0010057	0.825047	0.0098798	0.0329912	0.0048504	0.0093859	0.001358	0.0210684	0.0015522	0.0043503	0.0001203	99.861	0.207111	36.6443	0.101239	0.101846	3.63919e-16	NM-316C	0.0035154	1.0754e-06	2.13924	1.00027	0.000682	4e-06	0.0001	2e-06	0.0002761	1e-06	0.0124	2e-05	0.008	0.0005	0.00015	1.5e-05	250
68403-37	Tc	2021-06-20	3.68333	45.5998	0.019222	7.87886	0.014506	0.102766	0.0059748	0.107009	0.0145132	0.0005198	0.0002533	0.991438	0.0010057	0.824615	0.009991	0.0329912	0.0048504	0.0093859	0.001358	0.0210684	0.0015522	0.0043476	0.0001221	99.6819	0.175304	36.703	0.0912549	0.0919294	3.93943e-16	NM-316C	0.0035154	1.0754e-06	2.1394	1.00027	0.000682	4e-06	0.0001	2e-06	0.0002761	1e-06	0.0124	2e-05	0.008	0.0005	0.00015	1.5e-05	250
68403-38	Tc	2021-06-20	3.78333	84.6206	0.0216263	14.5924	0.0157277	0.186738	0.0056294	0.234085	0.0134109	0.0002719	0.0002446	0.991438	0.0010057	0.824181	0.0101244	0.0329912	0.0048504	0.0093859	0.001358	0.0210684	0.0015522	0.0043448	0.0001241	99.9274	0.0936743	36.864	0.0512343	0.0524366	7.29619e-16	NM-316C	0.0035154	1.0754e-06	2.13956	1.00027	0.000682	4e-06	0.0001	2e-06	0.0002761	1e-06	0.0124	2e-05	0.008	0.0005	0.00015	1.5e-05	250
68403-39	Tc	2021-06-20	3.86667	58.2424	0.0220949	10.0177	0.0133134	0.126807	0.0058604	0.220376	0.0146719	0.0004468	0.000237	0.991438	0.0010057	0.823723	0.0102883	0.0329912	0.0048504	0.0093859	0.001358	0.0210684	0.0015522	0.0043419	0.0001265	99.8038	0.132418	36.9133	0.0671842	0.0681079	5.00886e-16	NM-316C	0.0035154	1.0754e-06	2.13973	1.00027	0.000682	4e-06	0.0001	2e-06	0.0002761	1e-06	0.0124	2e-05	0.008	0.0005	0.00015	1.5e-05	250
68403-40	Tc	2021-06-20	3.96667	67.0621	0.0495624	11.4174	0.0179651	0.708122	0.0065712	0.555701	0.014744	0.0026139	0.0003427	0.991438	0.0010057	0.823283	0.0104666	0.0329912	0.0048504	0.0093859	0.001358	0.0210684	0.0015522	0.0043391	0.0001291	98.9295	0.183978	36.9666	0.084935	0.0856697	5.7087e-16	NM-316C	0.0035154	1.0754e-06	2.1399	1.00027	0.000682	4e-06	0.0001	2e-06	0.0002761	1e-06	0.0124	2e-05	0.008	0.0005	0.00015	1.5e-05	250
68403-41	Tc	2021-06-20	4.05	50.5995	0.0373073	9.55402	0.0152453	0.111614	0.0057851	0.0394104	0.015887	0.0008141	0.0002704	0.991438	0.0010057	0.822845	0.0106633	0.0329912	0.0048504	0.0093859	0.001358	0.0210684	0.0015522	0.0043363	0.0001318	99.5298	0.189893	33.5594	0.0789744	0.0796268	4.77701e-16	NM-316C	0.0035154	1.0754e-06	2.14006	1.00027	0.000682	4e-06	0.0001	2e-06	0.0002761	1e-06	0.0124	2e-05	0.008	0.0005	0.00015	1.5e-05	250
68403-42	Tc	2021-06-20	4.15	153.865	0.0274225	7.28402	0.0121941	0.153788	0.0050544	0.0427507	0.0144161	0.384943	0.0017155	0.991438	0.0010057	0.822409	0.0108775	0.0329912	0.0048504	0.0093859	0.001358	0.0210684	0.0015522	0.0043336	0.0001347	26.045	0.330109	35.0517	0.443827	0.443954	3.64201e-16	NM-316C	0.0035154	1.0754e-06	2.14022	1.00027	0.000682	4e-06	0.0001	2e-06	0.0002761	1e-06	0.0124	2e-05	0.008	0.0005	0.00015	1.5e-05	250
68403-43	Tc	2021-06-20	4.23333	29.1608	0.0193502	5.23498	0.014446	0.0648793	0.0058696	0.0771823	0.014975	0.003702	0.0003163	0.991438	0.0010057	0.821975	0.0111075	0.0329912	0.0048504	0.0093859	0.001358	0.0210684	0.0015522	0.0043308	0.0001378	96.2645	0.33427	34.1364	0.148372	0.148732	2.61749e-16	NM-316C	0.0035154	1.0754e-06	2.14038	1.00027	0.000682	4e-06	0.0001	2e-06	0.0002761	1e-06	0.0124	2e-05	0.008	0.0005	0.00015	1.5e-05	250
68403-44	Tc	2021-06-20	4.33333	28.9719	0.0176367	4.9531	0.0147795	0.0598088	0.0052687	0.159834	0.0168752	0.0006722	0.0002533	0.991438	0.0010057	0.821543	0.0113525	0.0329912	0.0048504	0.0093859	0.001358	0.0210684	0.0015522	0.004328	0.000141	99.3582	0.272932	36.9716	0.146843	0.147269	2.47655e-16	NM-316C	0.0035154	1.0754e-06	2.14054	1.00027	0.000682	4e-06	0.0001	2e-06	0.0002761	1e-06	0.0124	2e-05	0.008	0.0005	0.00015	1.5e-05	250
68403-45	Tc	2021-06-20	4.41667	9.53505	0.0157277	1.97393	0.0131626	0.0205975	0.0059395	0.0540375	0.0131228	0.0005551	0.0002556	0.991438	0.0010057	0.821111	0.0116123	0.0329912	0.0048504	0.0093859	0.001358	0.0210684	0.0015522	0.0043253	0.0001444	98.3221	0.826852	30.2608	0.318472	0.318604	9.86964e-17	NM-316C	0.0035154	1.0754e-06	2.1407	1.00027	0.000682	4e-06	0.0001	2e-06	0.0002761	1e-06	0.0124	2e-05	0.008	0.0005	0.00015	1.5e-05	250
68403-46	Tc	2021-06-20	4.51667	35.944	0.0197704	6.79703	0.0153426	0.0704306	0.0067534	0.0423471	0.0141657	0.0003495	0.0002477	0.991438	0.0010057	0.820677	0.0118868	0.0329912	0.0048504	0.0093859	0.001358	0.0210684	0.0015522	0.0043225	0.000148	99.7209	0.218679	33.5732	0.103116	0.103617	3.39851e-16	NM-316C	0.0035154	1.0754e-06	2.14086	1.00027	0.000682	4e-06	0.0001	2e-06	0.0002761	1e-06	0.0124	2e-05	0.008	0.0005	0.00015	1.5e-05	250
68403-47	Tc	2021-06-20	4.6	47.3449	0.0392274	7.78744	0.0154984	0.0940149	0.0060411	0.0478967	0.014899	0.0004536	0.0002573	0.991438	0.0010057	0.820246	0.0121725	0.0329912	0.0048504	0.0093859	0.001358	0.0210684	0.0015522	0.0043198	0.0001517	99.7245	0.199301	38.5542	0.102871	0.103531	3.89372e-16	NM-316C	0.0035154	1.0754e-06	2.14102	1.00027	0.000682	4e-06	0.0001	2e-06	0.0002761	1e-06	0.0124	2e-05	0.008	0.0005	0.00015	1.5e-05	250
68403-48	Tc	2021-06-20	4.7	83.2344	0.043226	14.1851	0.0156948	0.177312	0.005906	0.106969	0.0156245	0.0014717	0.0003154	0.991438	0.0010057	0.819814	0.012471	0.0329912	0.0048504	0.0093859	0.001358	0.0210684	0.0015522	0.004317	0.0001555	99.4871	0.134549	37.1345	0.061281	0.0623042	7.09256e-16	NM-316C	0.0035154	1.0754e-06	2.14118	1.00027	0.000682	4e-06	0.0001	2e-06	0.0002761	1e-06	0.0124	2e-05	0.008	0.0005	0.00015	1.5e-05	250
68403-49	Tc	2021-06-20	4.78333	117.308	0.0268084	19.5753	0.0160775	0.251377	0.0066045	0.413823	0.0165187	0.0159268	0.0004565	0.991438	0.0010057	0.819385	0.0127788	0.0329912	0.0048504	0.0093859	0.001358	0.0210684	0.0015522	0.0043143	0.0001594	96.0114	0.120009	36.6069	0.0535069	0.0546436	9.78764e-16	NM-316C	0.0035154	1.0754e-06	2.14134	1.00027	0.000682	4e-06	0.0001	2e-06	0.0002761	1e-06	0.0124	2e-05	0.008	0.0005	0.00015	1.5e-05	250
68403-50	Tc	2021-06-20	4.88333	95.2601	0.0446338	17.2482	0.0173678	0.212458	0.0062447	0.130493	0.0156084	0.0016279	0.0002788	0.991438	0.0010057	0.818952	0.0130988	0.0329912	0.0048504	0.0093859	0.001358	0.0210684	0.0015522	0.0043116	0.0001634	99.5052	0.109759	34.9763	0.0490593	0.050191	8.62409e-16	NM-316C	0.0035154	1.0754e-06	2.1415	1.00027	0.000682	4e-06	0.0001	2e-06	0.0002761	1e-06	0.0124	2e-05	0.008	0.0005	0.00015	1.5e-05	250
68403-51	Tc	2021-06-20	4.96667	956.058	0.144398	215.983	0.0315309	2.69815	0.0065277	1.38253	0.0164676	0.0043601	0.0003021	0.991438	0.0010057	0.81852	0.0134284	0.0329912	0.0048504	0.0093859	0.001358	0.0210684	0.0015522	0.0043088	0.0001676	99.8766	0.0282956	28.18	0.0071817	0.0111695	1.07991e-14	NM-316C	0.0035154	1.0754e-06	2.14166	1.00027	0.000682	4e-06	0.0001	2e-06	0.0002761	1e-06	0.0124	2e-05	0.008	0.0005	0.00015	1.5e-05	250
68403-52	Tc	2021-06-20	5.16667	80.1544	0.0232323	14.836	0.0148457	0.18486	0.0059835	0.16667	0.0128958	0.0028528	0.0002827	0.991438	0.0010057	0.817309	0.0136733	0.0329912	0.0048504	0.0093859	0.001358	0.0210684	0.0015522	0.0043014	0.0001706	98.9635	0.112862	34.0365	0.0501561	0.051206	7.41801e-16	NM-316C	0.0035154	1.0754e-06	2.142	1.00027	0.000682	4e-06	0.0001	2e-06	0.0002761	1e-06	0.0124	2e-05	0.008	0.0005	0.00015	1.5e-05	250
68403-53	Tc	2021-06-20	5.25	91.0459	0.0249663	15.4327	0.0175191	0.194526	0.0065215	0.283333	0.0135861	0.0054522	0.0003505	0.991438	0.0010057	0.816583	0.013558	0.0329912	0.0048504	0.0093859	0.001358	0.0210684	0.0015522	0.0042971	0.0001692	98.2533	0.120851	36.8761	0.0602388	0.0612653	7.71632e-16	NM-316C	0.0035154	1.0754e-06	2.14216	1.00027	0.000682	4e-06	0.0001	2e-06	0.0002761	1e-06	0.0124	2e-05	0.008	0.0005	0.00015	1.5e-05	250
68403-54	Tc	2021-06-20	5.35	27.4899	0.0368143	5.14636	0.0158157	0.079252	0.0055115	0.215649	0.0145776	0.0020738	0.0002903	0.991438	0.0010057	0.815847	0.0134427	0.0329912	0.0048504	0.0093859	0.001358	0.0210684	0.0015522	0.0042927	0.0001677	97.8323	0.36481	33.2742	0.153149	0.153481	2.57318e-16	NM-316C	0.0035154	1.0754e-06	2.14233	1.00027	0.000682	4e-06	0.0001	2e-06	0.0002761	1e-06	0.0124	2e-05	0.008	0.0005	0.00015	1.5e-05	250
68403-55	Tc	2021-06-20	5.43333	37.9956	0.0343743	6.4676	0.0167442	0.0819829	0.0056839	0.196956	0.0139824	0.0004258	0.0002842	0.991438	0.0010057	0.815112	0.0133288	0.0329912	0.0048504	0.0093859	0.001358	0.0210684	0.0015522	0.0042883	0.0001663	99.7106	0.255958	37.2619	0.130322	0.13081	3.2338e-16	NM-316C	0.0035154	1.0754e-06	2.14249	1.00027	0.000682	4e-06	0.0001	2e-06	0.0002761	1e-06	0.0124	2e-05	0.008	0.0005	0.00015	1.5e-05	250
68403-56	Tc	2021-06-20	5.53333	44.9862	0.0205201	7.56442	0.0156785	0.11011	0.0060253	0.0747557	0.0143946	0.0008177	0.0002789	0.991438	0.0010057	0.814377	0.0132165	0.0329912	0.0048504	0.0093859	0.001358	0.0210684	0.0015522	0.0042839	0.0001648	99.4762	0.194842	37.6281	0.104872	0.105489	3.78221e-16	NM-316C	0.0035154	1.0754e-06	2.14265	1.00027	0.000682	4e-06	0.0001	2e-06	0.0002761	1e-06	0.0124	2e-05	0.008	0.0005	0.00015	1.5e-05	250
68403-57	Tc	2021-06-20	6	51.707	0.0447339	8.55204	0.0153579	0.103261	0.0060786	0.445954	0.0132017	0.0052887	0.0003487	0.991438	0.0010057	0.810634	0.012669	0.0329912	0.0048504	0.0093859	0.001358	0.0210684	0.0015522	0.0042615	0.0001577	97.0437	0.233508	37.3246	0.10623	0.106829	4.27602e-16	NM-316C	0.0035154	1.0754e-06	2.14348	1.00027	0.000682	4e-06	0.0001	2e-06	0.0002761	1e-06	0.0124	2e-05	0.008	0.0005	0.00015	1.5e-05	250
68403-59	Tc	2021-06-20	6.15	31.2079	0.0349919	5.21215	0.0147478	0.0748664	0.0057593	0.0108018	0.0144737	0.0016407	0.0003065	0.991438	0.0010057	0.809466	0.0125073	0.0329912	0.0048504	0.0093859	0.001358	0.0210684	0.0015522	0.0042546	0.0001555	98.4476	0.330786	37.494	0.157677	0.158086	2.60607e-16	NM-316C	0.0035154	1.0754e-06	2.14374	1.00027	0.000682	4e-06	0.0001	2e-06	0.0002761	1e-06	0.0124	2e-05	0.008	0.0005	0.00015	1.5e-05	250
68403-60	Tc	2021-06-20	6.25	16.1925	0.017717	2.72982	0.0148223	0.0357222	0.0061451	0.143678	0.0157212	0.0002376	0.0002457	0.991438	0.0010057	0.808709	0.0124048	0.0329912	0.0048504	0.0093859	0.001358	0.0210684	0.0015522	0.0042501	0.0001542	99.6382	0.47508	37.5934	0.265978	0.266222	1.36491e-16	NM-316C	0.0035154	1.0754e-06	2.14391	1.00027	0.000682	4e-06	0.0001	2e-06	0.0002761	1e-06	0.0124	2e-05	0.008	0.0005	0.00015	1.5e-05	250
68403-61	Tc	2021-06-20	6.33333	20.169	0.0202689	3.50395	0.0151275	0.0444551	0.0057279	0.0544734	0.0144682	0.0008654	0.0002867	0.991438	0.0010057	0.807978	0.0123078	0.0329912	0.0048504	0.0093859	0.001358	0.0210684	0.0015522	0.0042457	0.0001529	98.7522	0.443943	36.1676	0.220424	0.220696	1.75197e-16	NM-316C	0.0035154	1.0754e-06	2.14407	1.00027	0.000682	4e-06	0.0001	2e-06	0.0002761	1e-06	0.0124	2e-05	0.008	0.0005	0.00015	1.5e-05	250
68403-62	Tc	2021-06-20	6.43333	44.7339	0.0216029	7.67393	0.0145337	0.0917269	0.006662	0.124094	0.0151137	0.0012326	0.0002773	0.991438	0.0010057	0.807252	0.0122132	0.0329912	0.0048504	0.0093859	0.001358	0.0210684	0.0015522	0.0042414	0.0001516	99.207	0.19607	36.791	0.0981555	0.0987859	3.83696e-16	NM-316C	0.0035154	1.0754e-06	2.14423	1.00027	0.000682	4e-06	0.0001	2e-06	0.0002761	1e-06	0.0124	2e-05	0.008	0.0005	0.00015	1.5e-05	250
68403-63	Tc	2021-06-20	6.51667	12.9576	0.0274566	2.16154	0.0151574	0.0437036	0.0065425	0.210652	0.0139621	0.0006531	0.000252	0.991438	0.0010057	0.806523	0.0121203	0.0329912	0.0048504	0.0093859	0.001358	0.0210684	0.0015522	0.004237	0.0001503	98.6437	0.648288	37.6145	0.349254	0.34944	1.08077e-16	NM-316C	0.0035154	1.0754e-06	2.1444	1.00027	0.000682	4e-06	0.0001	2e-06	0.0002761	1e-06	0.0124	2e-05	0.008	0.0005	0.00015	1.5e-05	250
68403-64	Tc	2021-06-20	6.61667	42.1384	0.0200246	7.26828	0.0142038	0.0856559	0.0055011	0.104988	0.0133488	0.0002861	0.0002457	0.991438	0.0010057	0.805799	0.0120298	0.0329912	0.0048504	0.0093859	0.001358	0.0210684	0.0015522	0.0042327	0.000149	99.819	0.185622	36.8157	0.0968043	0.0974443	3.63414e-16	NM-316C	0.0035154	1.0754e-06	2.14456	1.00027	0.000682	4e-06	0.0001	2e-06	0.0002761	1e-06	0.0124	2e-05	0.008	0.0005	0.00015	1.5e-05	250
68403-65	Tc	2021-06-20	6.7	43.8368	0.01934	7.86121	0.0140782	0.0906657	0.0050181	0.15545	0.0135516	0.0030538	0.0003124	0.991438	0.0010057	0.805073	0.0119411	0.0329912	0.0048504	0.0093859	0.001358	0.0210684	0.0015522	0.0042284	0.0001478	97.967	0.220168	34.7715	0.0978113	0.0983772	3.93061e-16	NM-316C	0.0035154	1.0754e-06	2.14472	1.00027	0.000682	4e-06	0.0001	2e-06	0.0002761	1e-06	0.0124	2e-05	0.008	0.0005	0.00015	1.5e-05	250
68403-66	Tc	2021-06-20	6.8	41.1533	0.0376017	6.93905	0.015843	0.0958314	0.0058914	0.031664	0.0140016	0.0004259	0.0002538	0.991438	0.0010057	0.804336	0.0118531	0.0329912	0.0048504	0.0093859	0.001358	0.0210684	0.0015522	0.0042239	0.0001465	99.7003	0.223946	37.6089	0.114304	0.11487	3.46953e-16	NM-316C	0.0035154	1.0754e-06	2.14488	1.00027	0.000682	4e-06	0.0001	2e-06	0.0002761	1e-06	0.0124	2e-05	0.008	0.0005	0.00015	1.5e-05	250
68403-67	Tc	2021-06-20	6.88333	39.5376	0.0202321	6.17155	0.0142929	0.100279	0.0052583	0.043115	0.0145274	0.0081302	0.0003463	0.991438	0.0010057	0.803605	0.0117679	0.0329912	0.0048504	0.0093859	0.001358	0.0210684	0.0015522	0.0042196	0.0001453	93.9257	0.268729	38.2697	0.138095	0.13858	3.08577e-16	NM-316C	0.0035154	1.0754e-06	2.14504	1.00027	0.000682	4e-06	0.0001	2e-06	0.0002761	1e-06	0.0124	2e-05	0.008	0.0005	0.00015	1.5e-05	250
68403-68	Tc	2021-06-20	6.98333	83.1353	0.0220598	14.0161	0.0163128	0.167986	0.0061027	0.123281	0.0134943	0.0011165	0.0002746	0.991438	0.0010057	0.80287	0.0116845	0.0329912	0.0048504	0.0093859	0.001358	0.0210684	0.0015522	0.0042152	0.0001441	99.6144	0.105382	37.5815	0.0576253	0.0587381	7.00805e-16	NM-316C	0.0035154	1.0754e-06	2.14521	1.00027	0.000682	4e-06	0.0001	2e-06	0.0002761	1e-06	0.0124	2e-05	0.008	0.0005	0.00015	1.5e-05	250
68403-69	Tc	2021-06-20	7.06667	11.258	0.0293682	1.75248	0.0150575	0.0041736	0.0064219	0.269789	0.0151534	0.0033738	0.0003037	0.991438	0.0010057	0.802139	0.0116037	0.0329912	0.0048504	0.0093859	0.001358	0.0210684	0.0015522	0.0042108	0.0001429	91.326	0.873218	37.3262	0.465376	0.465514	8.76241e-17	NM-316C	0.0035154	1.0754e-06	2.14537	1.00027	0.000682	4e-06	0.0001	2e-06	0.0002761	1e-06	0.0124	2e-05	0.008	0.0005	0.00015	1.5e-05	250
68403-70	Tc	2021-06-20	7.16667	90.1926	0.0237346	15.0916	0.0155719	0.177736	0.0054748	0.219237	0.0155145	0.0010046	0.0002488	0.991438	0.0010057	0.801409	0.0115252	0.0329912	0.0048504	0.0093859	0.001358	0.0210684	0.0015522	0.0042065	0.0001417	99.6899	0.0904886	37.8922	0.0505259	0.051812	7.54581e-16	NM-316C	0.0035154	1.0754e-06	2.14553	1.00027	0.000682	4e-06	0.0001	2e-06	0.0002761	1e-06	0.0124	2e-05	0.008	0.0005	0.00015	1.5e-05	250
68403-71	Tc	2021-06-20	7.25	55.0855	0.0384843	10.4289	0.014316	0.128085	0.0062606	0.061801	0.0140123	0.0007972	0.0002709	0.991438	0.0010057	0.800682	0.0114494	0.0329912	0.0048504	0.0093859	0.001358	0.0210684	0.0015522	0.0042021	0.0001405	99.5806	0.176415	33.4875	0.0706285	0.0713542	5.21444e-16	NM-316C	0.0035154	1.0754e-06	2.14569	1.00027	0.000682	4e-06	0.0001	2e-06	0.0002761	1e-06	0.0124	2e-05	0.008	0.0005	0.00015	1.5e-05	250
68403-72	Tc	2021-06-20	7.35	18.5221	0.0156445	3.43951	0.0149342	0.0351327	0.0056068	0.0312148	0.0146945	0.0005045	0.0002537	0.991438	0.0010057	0.79996	0.0113764	0.0329912	0.0048504	0.0093859	0.001358	0.0210684	0.0015522	0.0041978	0.0001394	99.2068	0.42281	34.0091	0.203154	0.203415	1.71975e-16	NM-316C	0.0035154	1.0754e-06	2.14585	1.00027	0.000682	4e-06	0.0001	2e-06	0.0002761	1e-06	0.0124	2e-05	0.008	0.0005	0.00015	1.5e-05	250
68403-73	Tc	2021-06-20	7.43333	21.1697	0.033788	3.63184	0.0125873	0.0403411	0.0057712	0.0799757	0.0139259	0.0009256	0.0002679	0.991438	0.0010057	0.799232	0.011305	0.0329912	0.0048504	0.0093859	0.001358	0.0210684	0.0015522	0.0041935	0.0001383	98.7365	0.436825	36.6159	0.19542	0.195735	1.81592e-16	NM-316C	0.0035154	1.0754e-06	2.14602	1.00027	0.000682	4e-06	0.0001	2e-06	0.0002761	1e-06	0.0124	2e-05	0.008	0.0005	0.00015	1.5e-05	250
68403-74	Tc	2021-06-20	7.53333	26.3868	0.0380892	4.27636	0.0138735	0.0554481	0.0054066	0.201229	0.0145193	0.0050808	0.0003252	0.991438	0.0010057	0.798504	0.0112361	0.0329912	0.0048504	0.0093859	0.001358	0.0210684	0.0015522	0.0041891	0.0001372	94.3649	0.415433	37.0438	0.193497	0.193822	2.13818e-16	NM-316C	0.0035154	1.0754e-06	2.14618	1.00027	0.000682	4e-06	0.0001	2e-06	0.0002761	1e-06	0.0124	2e-05	0.008	0.0005	0.00015	1.5e-05	250
68403-75	Tc	2021-06-20	7.61667	32.4417	0.035889	5.55335	0.0139677	0.0607657	0.005776	0.0554605	0.0144657	0.0002537	0.0002578	0.991438	0.0010057	0.797782	0.0111702	0.0329912	0.0048504	0.0093859	0.001358	0.0210684	0.0015522	0.0041848	0.0001361	99.7819	0.282706	37.0805	0.133046	0.133519	2.77667e-16	NM-316C	0.0035154	1.0754e-06	2.14634	1.00027	0.000682	4e-06	0.0001	2e-06	0.0002761	1e-06	0.0124	2e-05	0.008	0.0005	0.00015	1.5e-05	250
68403-76	Tc	2021-06-20	7.7	48.2043	0.0713402	5.49848	0.0227593	0.0600089	0.0092768	0.0651136	0.017868	0.0025081	0.0004347	0.991438	0.0010057	0.797166	0.0111159	0.0329912	0.0048504	0.0093859	0.001358	0.0210684	0.0015522	0.0041812	0.0001352	98.4716	0.338264	54.6768	0.278706	0.279193	2.74924e-16	NM-316C	0.0035154	1.0754e-06	2.14648	1.00027	0.000682	4e-06	0.0001	2e-06	0.0002761	1e-06	0.0124	2e-05	0.008	0.0005	0.00015	1.5e-05	250
68403-77	Tc	2021-06-20	7.78333	25.4268	0.0342892	4.35791	0.0154668	0.0570144	0.0058069	0.201496	0.0151825	0.000965	0.0002606	0.991438	0.0010057	0.796442	0.0110544	0.0329912	0.0048504	0.0093859	0.001358	0.0210684	0.0015522	0.0041768	0.0001342	98.9417	0.358082	36.7274	0.177764	0.178112	2.17895e-16	NM-316C	0.0035154	1.0754e-06	2.14664	1.00027	0.000682	4e-06	0.0001	2e-06	0.0002761	1e-06	0.0124	2e-05	0.008	0.0005	0.00015	1.5e-05	250
68403-80	Tc	2021-06-20	14.15	14.9446	0.0185193	2.3398	0.0147283	0.0206119	0.0054213	0.0386968	0.0151039	0.0021305	0.0002499	0.991438	0.0010057	0.745896	0.0135621	0.0329912	0.0048504	0.0093859	0.001358	0.0210684	0.0015522	0.0038751	0.0001312	95.8019	0.523924	38.91	0.317693	0.317911	1.1699e-16	NM-316C	0.0035154	1.0754e-06	2.1579	1.00028	0.000682	4e-06	0.0001	2e-06	0.0002761	1e-06	0.0124	2e-05	0.008	0.0005	0.00015	1.5e-05	250
68403-81	Tc	2021-06-20	14.3667	26.3143	0.0372997	4.43306	0.0146656	0.0748025	0.0052031	0.0395502	0.0151648	0.0001095	0.0002331	0.991438	0.0010057	0.744216	0.013831	0.0329912	0.0048504	0.0093859	0.001358	0.0210684	0.0015522	0.0038651	0.0001335	99.8904	0.330315	37.7129	0.166465	0.166856	2.21653e-16	NM-316C	0.0035154	1.0754e-06	2.15828	1.00028	0.000682	4e-06	0.0001	2e-06	0.0002761	1e-06	0.0124	2e-05	0.008	0.0005	0.00015	1.5e-05	250
68403-82	Tc	2021-06-20	14.45	21.3788	0.0324975	3.65797	0.0145562	0.0488836	0.0056097	0.137821	0.015568	0.001305	0.0002617	0.991438	0.0010057	0.74349	0.0139494	0.0329912	0.0048504	0.0093859	0.001358	0.0210684	0.0015522	0.0038608	0.0001345	98.2465	0.420678	36.5325	0.204264	0.204563	1.82899e-16	NM-316C	0.0035154	1.0754e-06	2.15844	1.00028	0.000682	4e-06	0.0001	2e-06	0.0002761	1e-06	0.0124	2e-05	0.008	0.0005	0.00015	1.5e-05	250
68403-83	Tc	2021-06-20	14.55	61.5394	0.0234161	10.0748	0.014574	0.127939	0.005803	0.105816	0.0147182	0.0002484	0.0002352	0.991438	0.0010057	0.742763	0.0140691	0.0329912	0.0048504	0.0093859	0.001358	0.0210684	0.0015522	0.0038564	0.0001356	99.8945	0.125789	38.7994	0.0721518	0.0731014	5.0374e-16	NM-316C	0.0035154	1.0754e-06	2.1586	1.00028	0.000682	4e-06	0.0001	2e-06	0.0002761	1e-06	0.0124	2e-05	0.008	0.0005	0.00015	1.5e-05	250
68403-85	Tc	2021-06-20	14.6833	22.5936	0.0199467	3.81341	0.013047	0.0466916	0.0068216	0.0713883	0.0116561	0.0005885	0.0002616	0.991438	0.0010057	0.741604	0.0142627	0.0329912	0.0048504	0.0093859	0.001358	0.0210684	0.0015522	0.0038495	0.0001373	99.2548	0.364806	37.4059	0.183118	0.183468	1.90671e-16	NM-316C	0.0035154	1.0754e-06	2.15886	1.00028	0.000682	4e-06	0.0001	2e-06	0.0002761	1e-06	0.0124	2e-05	0.008	0.0005	0.00015	1.5e-05	250
68403-86	Tc	2021-06-20	14.7833	24.2481	0.033809	4.00801	0.0156807	0.0442841	0.0058241	0.080652	0.0148941	0.0011903	0.0002433	0.991438	0.0010057	0.740856	0.0143893	0.0329912	0.0048504	0.0093859	0.001358	0.0210684	0.0015522	0.003845	0.0001384	98.5741	0.355982	37.9297	0.193008	0.19335	2.00401e-16	NM-316C	0.0035154	1.0754e-06	2.15903	1.00028	0.000682	4e-06	0.0001	2e-06	0.0002761	1e-06	0.0124	2e-05	0.008	0.0005	0.00015	1.5e-05	250
68403-87	Tc	2021-06-20	14.8833	55.2341	0.0214587	10.3002	0.0151226	0.122451	0.0060062	0.193612	0.0136688	0.0007515	0.0002324	0.991438	0.0010057	0.740112	0.0145164	0.0329912	0.0048504	0.0093859	0.001358	0.0210684	0.0015522	0.0038406	0.0001396	99.6256	0.136741	34.009	0.0664237	0.0672188	5.15009e-16	NM-316C	0.0035154	1.0754e-06	2.15919	1.00028	0.000682	4e-06	0.0001	2e-06	0.0002761	1e-06	0.0124	2e-05	0.008	0.0005	0.00015	1.5e-05	250
68403-88	Tc	2021-06-20	14.9667	62.9711	0.0232518	10.6108	0.0167122	0.127004	0.0059161	0.0953414	0.0165138	0.0008897	0.0002535	0.991438	0.0010057	0.739355	0.0146469	0.0329912	0.0048504	0.0093859	0.001358	0.0210684	0.0015522	0.0038361	0.0001408	99.5939	0.130615	37.5941	0.0750128	0.0758716	5.30539e-16	NM-316C	0.0035154	1.0754e-06	2.15936	1.00028	0.000682	4e-06	0.0001	2e-06	0.0002761	1e-06	0.0124	2e-05	0.008	0.0005	0.00015	1.5e-05	250
68403-89	Tc	2021-06-20	15.0667	52.4367	0.0231893	8.64217	0.0134205	0.112739	0.0061626	0.681747	0.0156313	0.0053022	0.0003008	0.991438	0.0010057	0.738589	0.0147802	0.0329912	0.0048504	0.0093859	0.001358	0.0210684	0.0015522	0.0038315	0.000142	97.1142	0.180978	37.4831	0.0884906	0.0892155	4.32108e-16	NM-316C	0.0035154	1.0754e-06	2.15953	1.00028	0.000682	4e-06	0.0001	2e-06	0.0002761	1e-06	0.0124	2e-05	0.008	0.0005	0.00015	1.5e-05	250
68403-90	Tc	2021-06-20	15.1667	35.1429	0.0216121	6.07361	0.014822	0.0723452	0.0053143	0.100995	0.0157392	0.000892	0.0002488	0.991438	0.0010057	0.737852	0.0149096	0.0329912	0.0048504	0.0093859	0.001358	0.0210684	0.0015522	0.0038271	0.0001432	99.272	0.22715	36.5446	0.119027	0.119541	3.0368e-16	NM-316C	0.0035154	1.0754e-06	2.1597	1.00028	0.000682	4e-06	0.0001	2e-06	0.0002761	1e-06	0.0124	2e-05	0.008	0.0005	0.00015	1.5e-05	250
68403-91	Tc	2021-06-20	15.25	35.2861	0.0358208	5.90842	0.0147448	0.0607238	0.0060821	0.0728824	0.0143201	0.0017788	0.0002978	0.991438	0.0010057	0.737117	0.0150398	0.0329912	0.0048504	0.0093859	0.001358	0.0210684	0.0015522	0.0038227	0.0001444	98.5244	0.287868	37.4277	0.137337	0.137803	2.95421e-16	NM-316C	0.0035154	1.0754e-06	2.15986	1.00028	0.000682	4e-06	0.0001	2e-06	0.0002761	1e-06	0.0124	2e-05	0.008	0.0005	0.00015	1.5e-05	250
68403-92	Tc	2021-06-20	15.35	93.1262	0.0250947	17.203	0.0165716	0.208749	0.0057969	0.153233	0.0158027	0.0014973	0.0002506	0.991438	0.0010057	0.736388	0.0151697	0.0329912	0.0048504	0.0093859	0.001358	0.0210684	0.0015522	0.0038184	0.0001456	99.5373	0.0892549	34.2991	0.0436939	0.0449134	8.60149e-16	NM-316C	0.0035154	1.0754e-06	2.16003	1.00028	0.000682	4e-06	0.0001	2e-06	0.0002761	1e-06	0.0124	2e-05	0.008	0.0005	0.00015	1.5e-05	250
68403-93	Tc	2021-06-20	15.4333	5.18148	0.0311866	0.821674	0.0133889	0.0241885	0.0068893	0.474885	0.0155857	-7.55e-05	0.0002385	0.991438	0.0010057	0.735658	0.0153011	0.0329912	0.0048504	0.0093859	0.001358	0.0210684	0.0015522	0.003814	0.0001468	101.185	1.60972	40.5705	0.881988	0.882074	4.10837e-17	NM-316C	0.0035154	1.0754e-06	2.16019	1.00028	0.000682	4e-06	0.0001	2e-06	0.0002761	1e-06	0.0124	2e-05	0.008	0.0005	0.00015	1.5e-05	250
68403-94	Tc	2021-06-20	15.5333	22.4936	0.0202821	4.00565	0.0152647	0.0500281	0.0056478	0.016373	0.015197	0.000944	0.0002528	0.991438	0.0010057	0.734931	0.0154326	0.0329912	0.0048504	0.0093859	0.001358	0.0210684	0.0015522	0.0038097	0.0001481	98.7639	0.356213	35.2952	0.180802	0.181118	2.00283e-16	NM-316C	0.0035154	1.0754e-06	2.16035	1.00028	0.000682	4e-06	0.0001	2e-06	0.0002761	1e-06	0.0124	2e-05	0.008	0.0005	0.00015	1.5e-05	250
68403-95	Tc	2021-06-20	15.6167	65.0438	0.0220936	11.2328	0.0149249	0.131646	0.005486	0.174164	0.0153547	0.0002186	0.000245	0.991438	0.0010057	0.734205	0.0155651	0.0329912	0.0048504	0.0093859	0.001358	0.0210684	0.0015522	0.0038053	0.0001493	99.922	0.122034	36.8089	0.0645629	0.0655183	5.6164e-16	NM-316C	0.0035154	1.0754e-06	2.16052	1.00028	0.000682	4e-06	0.0001	2e-06	0.0002761	1e-06	0.0124	2e-05	0.008	0.0005	0.00015	1.5e-05	250
68403-96	Tc	2021-06-20	15.7167	37.5867	0.0428845	6.95151	0.0154429	0.0752627	0.0051628	0.103201	0.0143684	0.0015473	0.0002663	0.991438	0.0010057	0.733477	0.0156989	0.0329912	0.0048504	0.0093859	0.001358	0.0210684	0.0015522	0.003801	0.0001506	98.8034	0.26444	34.0088	0.11073	0.111209	3.47576e-16	NM-316C	0.0035154	1.0754e-06	2.16068	1.00028	0.000682	4e-06	0.0001	2e-06	0.0002761	1e-06	0.0124	2e-05	0.008	0.0005	0.00015	1.5e-05	250
68403-97	Tc	2021-06-20	15.9167	53.1296	0.037044	8.87933	0.0137303	0.116437	0.0048297	0.0889462	0.0126335	0.0018967	0.0002533	0.991438	0.0010057	0.733886	0.0154139	0.0329912	0.0048504	0.0093859	0.001358	0.0210684	0.0015522	0.0038082	0.0001479	98.9574	0.172307	37.6612	0.0828111	0.0835926	4.43967e-16	NM-316C	0.0035154	1.0754e-06	2.16105	1.00028	0.000682	4e-06	0.0001	2e-06	0.0002761	1e-06	0.0124	2e-05	0.008	0.0005	0.00015	1.5e-05	250
68403-98	Tc	2021-06-20	16.0167	121.701	0.0276323	20.7197	0.0179742	0.265264	0.0056264	0.291441	0.0165744	0.0022322	0.0002566	0.991438	0.0010057	0.734903	0.015057	0.0329912	0.0048504	0.0093859	0.001358	0.0210684	0.0015522	0.0038184	0.0001446	99.4767	0.0711793	37.1682	0.0404348	0.0419721	1.03599e-15	NM-316C	0.0035154	1.0754e-06	2.16121	1.00028	0.000682	4e-06	0.0001	2e-06	0.0002761	1e-06	0.0124	2e-05	0.008	0.0005	0.00015	1.5e-05	250
68403-99	Tc	2021-06-20	16.1	50.9592	0.0369033	8.9035	0.0160692	0.119104	0.0052747	0.10923	0.0146389	0.0011843	0.0002241	0.991438	0.0010057	0.735908	0.0147139	0.0329912	0.0048504	0.0093859	0.001358	0.0210684	0.0015522	0.0038284	0.0001414	99.3299	0.165946	36.1729	0.0841868	0.0848968	4.45175e-16	NM-316C	0.0035154	1.0754e-06	2.16137	1.00028	0.000682	4e-06	0.0001	2e-06	0.0002761	1e-06	0.0124	2e-05	0.008	0.0005	0.00015	1.5e-05	250
68403-100	Tc	2021-06-20	16.1833	22.4535	0.031908	3.70212	0.0145094	0.038569	0.0057312	1.13225	0.0135728	0.0023629	0.0002875	0.991438	0.0010057	0.736916	0.0143799	0.0329912	0.0048504	0.0093859	0.001358	0.0210684	0.0015522	0.0038385	0.0001384	97.2973	0.427899	37.5434	0.212564	0.212868	1.85106e-16	NM-316C	0.0035154	1.0754e-06	2.16153	1.00028	0.000682	4e-06	0.0001	2e-06	0.0002761	1e-06	0.0124	2e-05	0.008	0.0005	0.00015	1.5e-05	250
68403-102	Tc	2021-06-20	16.3333	69.8157	0.0215547	12.0049	0.0153968	0.15124	0.0059363	0.168096	0.0161635	0.0008149	0.0002404	0.991438	0.0010057	0.738539	0.0138657	0.0329912	0.0048504	0.0093859	0.001358	0.0210684	0.0015522	0.0038547	0.0001338	99.6741	0.111537	36.8761	0.061076	0.0620887	6.00244e-16	NM-316C	0.0035154	1.0754e-06	2.16179	1.00028	0.000682	4e-06	0.0001	2e-06	0.0002761	1e-06	0.0124	2e-05	0.008	0.0005	0.00015	1.5e-05	250
68403-103	Tc	2021-06-20	16.4333	23.9672	0.038944	4.24999	0.0148101	0.555078	0.0053602	0.413411	0.0153632	0.0016509	0.0003067	0.991438	0.0010057	0.739544	0.013563	0.0329912	0.0048504	0.0093859	0.001358	0.0210684	0.0015522	0.0038647	0.0001312	98.1409	0.442209	35.2249	0.190544	0.190842	2.125e-16	NM-316C	0.0035154	1.0754e-06	2.16195	1.00028	0.000682	4e-06	0.0001	2e-06	0.0002761	1e-06	0.0124	2e-05	0.008	0.0005	0.00015	1.5e-05	250
68403-104	Tc	2021-06-20	16.5167	6.13187	0.0315128	1.1123	0.0137012	0.0136683	0.0063228	0.0257207	0.0135748	0.0002984	0.0002277	0.991438	0.0010057	0.740562	0.0132697	0.0329912	0.0048504	0.0093859	0.001358	0.0210684	0.0015522	0.0038749	0.0001288	98.5941	1.31555	34.5965	0.597294	0.597386	5.56148e-17	NM-316C	0.0035154	1.0754e-06	2.16212	1.00028	0.000682	4e-06	0.0001	2e-06	0.0002761	1e-06	0.0124	2e-05	0.008	0.0005	0.00015	1.5e-05	250
68403-105	Tc	2021-06-20	16.6167	31.2934	0.0331176	5.47711	0.0145233	0.0701023	0.0063687	0.0012245	0.015873	0.0028764	0.000281	0.991438	0.0010057	0.741585	0.012989	0.0329912	0.0048504	0.0093859	0.001358	0.0210684	0.0015522	0.0038851	0.0001265	97.2803	0.304383	35.3719	0.138861	0.139274	2.73855e-16	NM-316C	0.0035154	1.0754e-06	2.16228	1.00028	0.000682	4e-06	0.0001	2e-06	0.0002761	1e-06	0.0124	2e-05	0.008	0.0005	0.00015	1.5e-05	250
68403-106	Tc	2021-06-20	16.8167	23.6349	0.0344243	3.31247	0.0148668	0.048299	0.0060819	0.0295402	0.014111	0.0003662	0.0002291	0.991438	0.0010057	0.743915	0.0124087	0.0329912	0.0048504	0.0093859	0.001358	0.0210684	0.0015522	0.0039083	0.0001222	99.5522	0.353107	45.0973	0.246581	0.246957	1.65623e-16	NM-316C	0.0035154	1.0754e-06	2.16266	1.00028	0.000682	4e-06	0.0001	2e-06	0.0002761	1e-06	0.0124	2e-05	0.008	0.0005	0.00015	1.5e-05	250
68403-107	Tc	2021-06-20	16.9167	53.4129	0.0192213	8.95451	0.0140318	0.121986	0.0055275	0.134619	0.0132781	0.0006425	0.000234	0.991438	0.0010057	0.744936	0.0121825	0.0329912	0.0048504	0.0093859	0.001358	0.0210684	0.0015522	0.0039185	0.0001207	99.6648	0.13978	37.811	0.0775351	0.0783758	4.47726e-16	NM-316C	0.0035154	1.0754e-06	2.16282	1.00028	0.000682	4e-06	0.0001	2e-06	0.0002761	1e-06	0.0124	2e-05	0.008	0.0005	0.00015	1.5e-05	250
68403-108	Tc	2021-06-20	17	26.1465	0.0188439	4.43669	0.0142674	0.0724089	0.0063432	0.147203	0.0150332	0.000852	0.0002733	0.991438	0.0010057	0.745956	0.0119748	0.0329912	0.0048504	0.0093859	0.001358	0.0210684	0.0015522	0.0039287	0.0001195	99.0827	0.325846	37.1452	0.167128	0.167506	2.21835e-16	NM-316C	0.0035154	1.0754e-06	2.16299	1.00028	0.000682	4e-06	0.0001	2e-06	0.0002761	1e-06	0.0124	2e-05	0.008	0.0005	0.00015	1.5e-05	250
68403-109	Tc	2021-06-20	17.1	26.0748	0.0198867	4.48684	0.0141305	0.0583258	0.0052365	0.100247	0.0149159	0.0004153	0.0002384	0.991438	0.0010057	0.746964	0.0117886	0.0329912	0.0048504	0.0093859	0.001358	0.0210684	0.0015522	0.0039388	0.0001185	99.5601	0.291532	36.8081	0.154306	0.154708	2.24342e-16	NM-316C	0.0035154	1.0754e-06	2.16315	1.00028	0.000682	4e-06	0.0001	2e-06	0.0002761	1e-06	0.0124	2e-05	0.008	0.0005	0.00015	1.5e-05	250
68403-110	Tc	2021-06-20	17.1833	65.6669	0.0209657	10.8978	0.0158462	0.128355	0.0065078	0.108786	0.0118076	0.0047279	0.0003054	0.991438	0.0010057	0.747969	0.0116228	0.0329912	0.0048504	0.0093859	0.001358	0.0210684	0.0015522	0.0039488	0.0001178	97.8827	0.145157	37.5166	0.0761977	0.0770398	5.44892e-16	NM-316C	0.0035154	1.0754e-06	2.16331	1.00028	0.000682	4e-06	0.0001	2e-06	0.0002761	1e-06	0.0124	2e-05	0.008	0.0005	0.00015	1.5e-05	250
68403-111	Tc	2021-06-20	17.2833	23.8736	0.0296988	4.35353	0.0152027	0.0488582	0.0059311	-0.0031729	0.0147706	0.0008677	0.0002404	0.991438	0.0010057	0.748978	0.0114772	0.0329912	0.0048504	0.0093859	0.001358	0.0210684	0.0015522	0.0039589	0.0001173	98.9227	0.345963	34.5286	0.163693	0.164027	2.17677e-16	NM-316C	0.0035154	1.0754e-06	2.16347	1.00028	0.000682	4e-06	0.0001	2e-06	0.0002761	1e-06	0.0124	2e-05	0.008	0.0005	0.00015	1.5e-05	250
68403-112	Tc	2021-06-20	17.3667	139.579	0.026587	25.5781	0.0151607	0.312217	0.0061979	0.173042	0.0149806	0.0159958	0.0004289	0.991438	0.0010057	0.749986	0.0113532	0.0329912	0.0048504	0.0093859	0.001358	0.0210684	0.0015522	0.0039689	0.000117	96.6184	0.0955855	33.5685	0.0377256	0.0390737	1.27891e-15	NM-316C	0.0035154	1.0754e-06	2.16363	1.00028	0.000682	4e-06	0.0001	2e-06	0.0002761	1e-06	0.0124	2e-05	0.008	0.0005	0.00015	1.5e-05	250
68403-113	Tc	2021-06-20	17.4667	23.4511	0.017252	4.08347	0.0153835	0.0451248	0.0057076	0.104645	0.016485	0.0020535	0.0002514	0.991438	0.0010057	0.750988	0.0112519	0.0329912	0.0048504	0.0093859	0.001358	0.0210684	0.0015522	0.0039789	0.0001171	97.4446	0.333732	35.6128	0.177798	0.178125	2.04174e-16	NM-316C	0.0035154	1.0754e-06	2.1638	1.00028	0.000682	4e-06	0.0001	2e-06	0.0002761	1e-06	0.0124	2e-05	0.008	0.0005	0.00015	1.5e-05	250
68403-115	Tc	2021-06-20	17.6167	75.211	0.0211797	13.832	0.0169899	0.192718	0.0056973	0.189364	0.0149314	0.0023843	0.0002608	0.991438	0.0010057	0.752645	0.0111343	0.0329912	0.0048504	0.0093859	0.001358	0.0210684	0.0015522	0.0039955	0.0001177	99.0827	0.110804	34.2948	0.0555786	0.0565421	6.91599e-16	NM-316C	0.0035154	1.0754e-06	2.16406	1.00028	0.000682	4e-06	0.0001	2e-06	0.0002761	1e-06	0.0124	2e-05	0.008	0.0005	0.00015	1.5e-05	250
68403-116	Tc	2021-06-20	17.7	74.4108	0.0203522	13.0102	0.0153203	0.161411	0.0060602	0.202348	0.0127901	0.0007262	0.0002636	0.991438	0.0010057	0.753653	0.0110937	0.0329912	0.0048504	0.0093859	0.001358	0.0210684	0.0015522	0.0040055	0.0001184	99.7332	0.112423	36.2927	0.0577058	0.0587436	6.50511e-16	NM-316C	0.0035154	1.0754e-06	2.16422	1.00028	0.000682	4e-06	0.0001	2e-06	0.0002761	1e-06	0.0124	2e-05	0.008	0.0005	0.00015	1.5e-05	250
68403-117	Tc	2021-06-20	17.8	121.495	0.0246869	21.7624	0.0171155	0.269394	0.0055012	0.254944	0.0146589	0.0005545	0.000232	0.991438	0.0010057	0.754664	0.011077	0.0329912	0.0048504	0.0093859	0.001358	0.0210684	0.0015522	0.0040156	0.0001194	99.8819	0.0646644	35.4852	0.0349686	0.0365839	1.08812e-15	NM-316C	0.0035154	1.0754e-06	2.16439	1.00028	0.000682	4e-06	0.0001	2e-06	0.0002761	1e-06	0.0124	2e-05	0.008	0.0005	0.00015	1.5e-05	250
68403-118	Tc	2021-06-20	17.8833	54.3176	0.0375182	9.32332	0.0156494	0.121042	0.0057151	0.225544	0.01335	0.0001789	0.0002402	0.991438	0.0010057	0.755675	0.0110844	0.0329912	0.0048504	0.0093859	0.001358	0.0210684	0.0015522	0.0040257	0.0001206	99.9364	0.163801	37.0379	0.0822018	0.0829635	4.66166e-16	NM-316C	0.0035154	1.0754e-06	2.16455	1.00028	0.000682	4e-06	0.0001	2e-06	0.0002761	1e-06	0.0124	2e-05	0.008	0.0005	0.00015	1.5e-05	250
68403-119	Tc	2021-06-20	17.9833	53.6245	0.0204615	9.07151	0.0153663	0.108914	0.0056611	0.124372	0.0154765	0.0032574	0.0003012	0.991438	0.0010057	0.756687	0.0111159	0.0329912	0.0048504	0.0093859	0.001358	0.0210684	0.0015522	0.0040358	0.0001221	98.2211	0.175021	36.9368	0.0888171	0.0895188	4.53575e-16	NM-316C	0.0035154	1.0754e-06	2.16471	1.00028	0.000682	4e-06	0.0001	2e-06	0.0002761	1e-06	0.0124	2e-05	0.008	0.0005	0.00015	1.5e-05	250
68403-120	Tc	2021-06-20	18.0667	95.3996	0.0258999	16.2696	0.0148448	0.194403	0.0063685	0.23909	0.0147817	0.0004029	0.0002573	0.991438	0.0010057	0.757719	0.0111726	0.0329912	0.0048504	0.0093859	0.001358	0.0210684	0.0015522	0.0040461	0.0001238	99.8952	0.0894162	37.2599	0.0459918	0.0473556	8.13481e-16	NM-316C	0.0035154	1.0754e-06	2.16488	1.00028	0.000682	4e-06	0.0001	2e-06	0.0002761	1e-06	0.0124	2e-05	0.008	0.0005	0.00015	1.5e-05	250
68403-121	Tc	2021-06-20	18.1667	55.7604	0.0401473	9.96289	0.0143303	0.126473	0.0062312	0.114838	0.0137151	0.002168	0.0002682	0.991438	0.0010057	0.758749	0.0112535	0.0329912	0.0048504	0.0093859	0.001358	0.0210684	0.0015522	0.0040564	0.0001258	98.8661	0.175233	35.2152	0.0755244	0.0762744	4.98145e-16	NM-316C	0.0035154	1.0754e-06	2.16505	1.00028	0.000682	4e-06	0.0001	2e-06	0.0002761	1e-06	0.0124	2e-05	0.008	0.0005	0.00015	1.5e-05	250
68403-122	Tc	2021-06-20	18.25	16.4933	0.0181567	2.71653	0.0151747	0.0318854	0.0062507	-0.0013565	0.014645	0.0003444	0.0002514	0.991438	0.0010057	0.759791	0.0113597	0.0329912	0.0048504	0.0093859	0.001358	0.0210684	0.0015522	0.0040668	0.000128	99.381	0.477196	38.3713	0.276763	0.277007	1.35827e-16	NM-316C	0.0035154	1.0754e-06	2.16521	1.00028	0.000682	4e-06	0.0001	2e-06	0.0002761	1e-06	0.0124	2e-05	0.008	0.0005	0.00015	1.5e-05	250
68403-123	Tc	2021-06-20	18.35	38.8189	0.038102	6.49482	0.0164375	0.0747224	0.0061025	0.0485879	0.0159674	0.0011629	0.0002747	0.991438	0.0010057	0.760814	0.0114871	0.0329912	0.0048504	0.0093859	0.001358	0.0210684	0.0015522	0.004077	0.0001304	99.1233	0.251259	37.6824	0.128529	0.129035	3.24741e-16	NM-316C	0.0035154	1.0754e-06	2.16538	1.00028	0.000682	4e-06	0.0001	2e-06	0.0002761	1e-06	0.0124	2e-05	0.008	0.0005	0.00015	1.5e-05	250
68403-124	Tc	2021-06-20	18.45	79.2698	0.0470489	13.7202	0.0159402	0.173308	0.0062728	0.0678306	0.0157606	0.000412	0.0002688	0.991438	0.0010057	0.761835	0.0116361	0.0329912	0.0048504	0.0093859	0.001358	0.0210684	0.0015522	0.0040872	0.000133	99.8531	0.131435	36.7021	0.0599887	0.0610099	6.8601e-16	NM-316C	0.0035154	1.0754e-06	2.16554	1.00028	0.000682	4e-06	0.0001	2e-06	0.0002761	1e-06	0.0124	2e-05	0.008	0.0005	0.00015	1.5e-05	250
68403-125	Tc	2021-06-20	18.5333	64.2228	0.0219358	10.8701	0.015235	0.119991	0.0057949	0.0858142	0.0149348	0.0014645	0.0002638	0.991438	0.0010057	0.762834	0.0118025	0.0329912	0.0048504	0.0093859	0.001358	0.0210684	0.0015522	0.0040972	0.0001357	99.3355	0.131299	37.3321	0.0700458	0.0709522	5.43503e-16	NM-316C	0.0035154	1.0754e-06	2.1657	1.00028	0.000682	4e-06	0.0001	2e-06	0.0002761	1e-06	0.0124	2e-05	0.008	0.0005	0.00015	1.5e-05	250
68403-126	Tc	2021-06-20	18.9	66.2753	0.0424335	11.1727	0.0146971	0.138928	0.0060929	0.038801	0.0142208	0.0034592	0.0002949	0.991438	0.0010057	0.766922	0.0126765	0.0329912	0.0048504	0.0093859	0.001358	0.0210684	0.0015522	0.004138	0.0001483	98.4601	0.159905	37.1534	0.0731405	0.0740009	5.58634e-16	NM-316C	0.0035154	1.0754e-06	2.16636	1.00028	0.000682	4e-06	0.0001	2e-06	0.0002761	1e-06	0.0124	2e-05	0.008	0.0005	0.00015	1.5e-05	250
68403-127	Tc	2021-06-20	19	33.7805	0.0354961	7.77851	0.0162106	0.103984	0.0054893	0.103536	0.0149286	0.0002889	0.0002617	0.991438	0.0010057	0.767936	0.0129365	0.0329912	0.0048504	0.0093859	0.001358	0.0210684	0.0015522	0.0041481	0.0001518	99.772	0.273886	27.6213	0.0899828	0.0903728	3.88925e-16	NM-316C	0.0035154	1.0754e-06	2.16653	1.00028	0.000682	4e-06	0.0001	2e-06	0.0002761	1e-06	0.0124	2e-05	0.008	0.0005	0.00015	1.5e-05	250
68403-128	Tc	2021-06-20	19.0833	108.073	0.0266663	58.0606	0.0195987	0.741389	0.0057573	0.913705	0.0135391	0.0011948	0.000295	0.991438	0.0010057	0.768948	0.0132109	0.0329912	0.0048504	0.0093859	0.001358	0.0210684	0.0015522	0.0041582	0.0001554	99.7409	0.0961372	11.8571	0.0112733	0.0118389	2.90303e-15	NM-316C	0.0035154	1.0754e-06	2.16669	1.00028	0.000682	4e-06	0.0001	2e-06	0.0002761	1e-06	0.0124	2e-05	0.008	0.0005	0.00015	1.5e-05	250
68403-129	Tc	2021-06-20	19.1833	10.1015	0.0175561	0.969576	0.014569	0.0099513	0.0065739	0.0289827	0.0152649	0.0122092	0.0003986	0.991438	0.0010057	0.769983	0.0135068	0.0329912	0.0048504	0.0093859	0.001358	0.0210684	0.0015522	0.0041686	0.0001592	64.2793	1.18515	42.5631	0.998508	0.998591	4.84788e-17	NM-316C	0.0035154	1.0754e-06	2.16685	1.00028	0.000682	4e-06	0.0001	2e-06	0.0002761	1e-06	0.0124	2e-05	0.008	0.0005	0.00015	1.5e-05	250
68403-130	Tc	2021-06-20	19.2667	8.91412	0.0303874	1.89355	0.0155055	0.0176649	0.0050309	0.0552765	0.0152826	0.000759	0.0002753	0.991438	0.0010057	0.770992	0.0138081	0.0329912	0.0048504	0.0093859	0.001358	0.0210684	0.0015522	0.0041786	0.000163	97.5288	1.03144	29.2599	0.375645	0.37575	9.46775e-17	NM-316C	0.0035154	1.0754e-06	2.16702	1.00028	0.000682	4e-06	0.0001	2e-06	0.0002761	1e-06	0.0124	2e-05	0.008	0.0005	0.00015	1.5e-05	250
68403-131	Tc	2021-06-20	19.3667	16.6203	0.0300913	2.26442	0.0142145	0.0292883	0.0052185	0.0550821	0.0160905	0.0013718	0.0002712	0.991438	0.0010057	0.772003	0.0141227	0.0329912	0.0048504	0.0093859	0.001358	0.0210684	0.0015522	0.0041887	0.0001669	97.5854	0.545199	45.4715	0.368768	0.369024	1.13221e-16	NM-316C	0.0035154	1.0754e-06	2.16718	1.00028	0.000682	4e-06	0.0001	2e-06	0.0002761	1e-06	0.0124	2e-05	0.008	0.0005	0.00015	1.5e-05	250
68403-132	Tc	2021-06-20	19.45	12.4761	0.0295161	2.17872	0.0147735	0.030422	0.0063434	0.017226	0.0133884	0.0005328	0.0002673	0.991438	0.0010057	0.77302	0.0144511	0.0329912	0.0048504	0.0093859	0.001358	0.0210684	0.0015522	0.0041989	0.0001709	98.7477	0.716337	35.9805	0.343813	0.343986	1.08936e-16	NM-316C	0.0035154	1.0754e-06	2.16734	1.00028	0.000682	4e-06	0.0001	2e-06	0.0002761	1e-06	0.0124	2e-05	0.008	0.0005	0.00015	1.5e-05	250
68403-133	Tc	2021-06-20	19.55	26.9437	0.0341236	4.49293	0.0139628	0.0513393	0.0059383	0.0514607	0.0145836	0.001532	0.0002754	0.991438	0.0010057	0.774047	0.0147935	0.0329912	0.0048504	0.0093859	0.001358	0.0210684	0.0015522	0.0042091	0.0001751	98.3326	0.351081	37.5089	0.169397	0.169778	2.24647e-16	NM-316C	0.0035154	1.0754e-06	2.16751	1.00028	0.000682	4e-06	0.0001	2e-06	0.0002761	1e-06	0.0124	2e-05	0.008	0.0005	0.00015	1.5e-05	250
68403-135	Tc	2021-07-18	23.0333	31.5029	0.0228406	5.26786	0.0145711	0.061524	0.0061753	0.247851	0.0277257	0.0016316	0.0004	0.995924	0.0011334	2.43241	0.017148	0.0335361	0.0055971	0.0082943	0.0013478	0.0232813	0.0016058	0.0105667	0.0002314	98.5311	0.389547	37.4811	0.177034	0.177398	2.63393e-16	NM-316C	0.0035154	1.0754e-06	3.77895	1.00048	0.000682	4e-06	0.0001	2e-06	0.0002761	1e-06	0.0124	2e-05	0.008	0.0005	0.00015	1.5e-05	250
68403-136	Tc	2021-07-18	23.1333	13.9985	0.0209422	2.16214	0.014298	0.0254629	0.0053355	0.0913132	0.0256573	0.0065696	0.0004753	0.995924	0.0011334	2.42166	0.0169718	0.0335361	0.0055971	0.0082943	0.0013478	0.0232813	0.0016058	0.0105215	0.000229	86.1673	1.02402	35.5091	0.475534	0.475656	1.08107e-16	NM-316C	0.0035154	1.0754e-06	3.77925	1.00048	0.000682	4e-06	0.0001	2e-06	0.0002761	1e-06	0.0124	2e-05	0.008	0.0005	0.00015	1.5e-05	250
68403-137	Tc	2021-07-18	23.2167	35.1723	0.0232085	5.84692	0.0135411	0.0756587	0.0056735	0.0755284	0.0251341	0.0019018	0.0003739	0.995924	0.0011334	2.41151	0.0168067	0.0335361	0.0055971	0.0082943	0.0013478	0.0232813	0.0016058	0.0104788	0.0002268	98.4176	0.328224	37.6566	0.149358	0.149793	2.92346e-16	NM-316C	0.0035154	1.0754e-06	3.77953	1.00048	0.000682	4e-06	0.0001	2e-06	0.0002761	1e-06	0.0124	2e-05	0.008	0.0005	0.00015	1.5e-05	250
68403-138	Tc	2021-07-18	23.3167	93.1858	0.0268671	15.6633	0.017722	0.196785	0.0062032	0.110974	0.0247983	0.0018981	0.0004153	0.995924	0.0011334	2.40135	0.0166431	0.0335361	0.0055971	0.0082943	0.0013478	0.0232813	0.0016058	0.0104362	0.0002245	99.4069	0.138529	37.6161	0.0659275	0.0669041	7.83165e-16	NM-316C	0.0035154	1.0754e-06	3.77982	1.00048	0.000682	4e-06	0.0001	2e-06	0.0002761	1e-06	0.0124	2e-05	0.008	0.0005	0.00015	1.5e-05	250
68403-139	Tc	2021-07-18	23.4	17.1897	0.020765	3.09446	0.015229	0.0365573	0.0061513	0.003649	0.0243294	0.008442	0.0004867	0.995924	0.0011334	2.39119	0.016481	0.0335361	0.0055971	0.0082943	0.0013478	0.0232813	0.0016058	0.0103935	0.0002223	85.4676	0.853053	30.2558	0.332059	0.332186	1.54723e-16	NM-316C	0.0035154	1.0754e-06	3.7801	1.00048	0.000682	4e-06	0.0001	2e-06	0.0002761	1e-06	0.0124	2e-05	0.008	0.0005	0.00015	1.5e-05	250
68403-140	Tc	2021-07-18	23.4833	47.432	0.0237525	8.08207	0.0157631	0.0945067	0.0064238	0.306689	0.0267604	0.0093713	0.0004527	0.995924	0.0011334	2.38104	0.0163205	0.0335361	0.0055971	0.0082943	0.0013478	0.0232813	0.0016058	0.0103508	0.0002201	94.2058	0.291004	35.1891	0.126143	0.126593	4.04103e-16	NM-316C	0.0035154	1.0754e-06	3.78038	1.00048	0.000682	4e-06	0.0001	2e-06	0.0002761	1e-06	0.0124	2e-05	0.008	0.0005	0.00015	1.5e-05	250
68403-141	Tc	2021-07-18	23.5833	36.2533	0.0215707	6.08099	0.0145008	0.0786412	0.0053672	0.155636	0.0261295	0.0031432	0.0004327	0.995924	0.0011334	2.37082	0.0161606	0.0335361	0.0055971	0.0082943	0.0013478	0.0232813	0.0016058	0.0103079	0.0002179	97.4696	0.363119	36.9673	0.160443	0.160833	3.0405e-16	NM-316C	0.0035154	1.0754e-06	3.78067	1.00048	0.000682	4e-06	0.0001	2e-06	0.0002761	1e-06	0.0124	2e-05	0.008	0.0005	0.00015	1.5e-05	250
68403-142	Tc	2021-07-18	23.6667	36.4828	0.0226686	5.99494	0.0146962	0.0991095	0.0049625	0.0309314	0.0278226	0.0033856	0.0004135	0.995924	0.0011334	2.36057	0.016002	0.0335361	0.0055971	0.0082943	0.0013478	0.0232813	0.0016058	0.0102648	0.0002157	97.263	0.346695	37.6488	0.159581	0.159987	2.99747e-16	NM-316C	0.0035154	1.0754e-06	3.78095	1.00048	0.000682	4e-06	0.0001	2e-06	0.0002761	1e-06	0.0124	2e-05	0.008	0.0005	0.00015	1.5e-05	250
68403-143	Tc	2021-07-19	0.0166667	49.6261	0.0237188	8.3051	0.0144907	0.117425	0.0069014	0.251801	0.0262997	0.0054103	0.0003992	0.995924	0.0011334	2.32156	0.0154145	0.0335361	0.0055971	0.0082943	0.0013478	0.0232813	0.0016058	0.0101009	0.0002075	96.8162	0.247494	36.8053	0.111432	0.111988	4.15255e-16	NM-316C	0.0035154	1.0754e-06	3.78204	1.00048	0.000682	4e-06	0.0001	2e-06	0.0002761	1e-06	0.0124	2e-05	0.008	0.0005	0.00015	1.5e-05	250
68403-144	Tc	2021-07-19	6.58333	78.4366	0.0231104	12.8292	0.0162788	0.157265	0.0063145	0.168775	0.024381	0.0072056	0.0004198	0.995924	0.0011334	1.58833	0.0132461	0.0335361	0.0055971	0.0082943	0.0013478	0.0232813	0.0016058	0.0070202	0.000154	97.2991	0.164042	37.8365	0.0782246	0.079059	6.41459e-16	NM-316C	0.0035154	1.0754e-06	3.8025	1.00048	0.000682	4e-06	0.0001	2e-06	0.0002761	1e-06	0.0124	2e-05	0.008	0.0005	0.00015	1.5e-05	250
68403-145	Tc	2021-07-19	6.68333	41.0582	0.0209875	6.89572	0.0156182	0.0832641	0.0052118	-0.0157396	0.0266765	0.0030776	0.0003365	0.995924	0.0011334	1.57765	0.0133623	0.0335361	0.0055971	0.0082943	0.0013478	0.0232813	0.0016058	0.0069753	0.0001551	97.7785	0.253198	37.0358	0.124772	0.125275	3.44786e-16	NM-316C	0.0035154	1.0754e-06	3.8028	1.00048	0.000682	4e-06	0.0001	2e-06	0.0002761	1e-06	0.0124	2e-05	0.008	0.0005	0.00015	1.5e-05	250
68403-146	Tc	2021-07-19	6.76667	47.5489	0.0219183	8.17607	0.0154102	0.141184	0.0053984	0.0891577	0.0249871	0.0149807	0.0004545	0.995924	0.0011334	1.56696	0.0134817	0.0335361	0.0055971	0.0082943	0.0013478	0.0232813	0.0016058	0.0069304	0.0001563	90.6947	0.28991	33.5843	0.12255	0.122972	4.08804e-16	NM-316C	0.0035154	1.0754e-06	3.8031	1.00048	0.000682	4e-06	0.0001	2e-06	0.0002761	1e-06	0.0124	2e-05	0.008	0.0005	0.00015	1.5e-05	250
68403-147	Tc	2021-07-19	6.86667	46.919	0.0218888	7.85746	0.0159853	0.0952771	0.0062454	0.227934	0.0246	0.0051207	0.0003368	0.995924	0.0011334	1.55637	0.0136032	0.0335361	0.0055971	0.0082943	0.0013478	0.0232813	0.0016058	0.0068859	0.0001576	96.8099	0.222462	36.7778	0.110478	0.111038	3.92873e-16	NM-316C	0.0035154	1.0754e-06	3.8034	1.00048	0.000682	4e-06	0.0001	2e-06	0.0002761	1e-06	0.0124	2e-05	0.008	0.0005	0.00015	1.5e-05	250
68403-148	Tc	2021-07-19	6.96667	21.3403	0.0188127	3.42414	0.0138291	0.0393642	0.0065556	0.0068725	0.0298904	0.004244	0.0003282	0.995924	0.0011334	1.546	0.0137252	0.0335361	0.0055971	0.0082943	0.0013478	0.0232813	0.0016058	0.0068423	0.0001589	94.1176	0.471149	37.314	0.235448	0.235719	1.71207e-16	NM-316C	0.0035154	1.0754e-06	3.80369	1.00048	0.000682	4e-06	0.0001	2e-06	0.0002761	1e-06	0.0124	2e-05	0.008	0.0005	0.00015	1.5e-05	250
68403-149	Tc	2021-07-19	7.05	27.0581	0.0207849	4.59026	0.0160502	0.0633576	0.0061079	0.110782	0.024785	0.0090757	0.000378	0.995924	0.0011334	1.5356	0.0138504	0.0335361	0.0055971	0.0082943	0.0013478	0.0232813	0.0016058	0.0067986	0.0001602	90.1088	0.426392	33.8197	0.195558	0.195827	2.29513e-16	NM-316C	0.0035154	1.0754e-06	3.80398	1.00048	0.000682	4e-06	0.0001	2e-06	0.0002761	1e-06	0.0124	2e-05	0.008	0.0005	0.00015	1.5e-05	250
68403-150	Tc	2021-07-19	7.15	32.4543	0.0344975	5.63518	0.027962	0.0812262	0.005502	0.0137019	0.0261445	-0.0067275	0.001087	0.995924	0.0011334	1.52522	0.0139779	0.0335361	0.0055971	0.0082943	0.0013478	0.0232813	0.0016058	0.006755	0.0001615	106.138	1.00326	38.8651	0.4086	0.408769	2.81759e-16	NM-316C	0.0035154	1.0754e-06	3.80427	1.00048	0.000682	4e-06	0.0001	2e-06	0.0002761	1e-06	0.0124	2e-05	0.008	0.0005	0.00015	1.5e-05	250
68403-151	Tc	2021-07-19	8.01667	59.0787	0.0231594	10.4374	0.0159923	0.127827	0.0057824	0.100098	0.0243607	0.005113	0.0003599	0.995924	0.0011334	1.42813	0.0152923	0.0335361	0.0055971	0.0082943	0.0013478	0.0232813	0.0016058	0.0063471	0.0001762	97.4525	0.188868	35.1069	0.0848125	0.085477	5.2187e-16	NM-316C	0.0035154	1.0754e-06	3.80699	1.00048	0.000682	4e-06	0.0001	2e-06	0.0002761	1e-06	0.0124	2e-05	0.008	0.0005	0.00015	1.5e-05	250
68403-152	Tc	2021-07-19	17.25	64.6004	0.0229151	11.9148	0.0166311	0.149181	0.0058206	0.131147	0.0268352	0.0024295	0.0004001	0.995924	0.0011334	2.19649	0.0154274	0.0335361	0.0055971	0.0082943	0.0013478	0.0232813	0.0016058	0.0095366	0.0002269	98.9034	0.190456	34.1358	0.0795161	0.0801863	5.9574e-16	NM-316C	0.0035154	1.0754e-06	3.83601	1.00048	0.000682	4e-06	0.0001	2e-06	0.0002761	1e-06	0.0124	2e-05	0.008	0.0005	0.00015	1.5e-05	250
68403-153	Tc	2021-07-19	17.3333	11.8094	0.0228376	1.8771	0.0179614	0.0329185	0.0070094	0.139721	0.0290521	0.0017051	0.0004621	0.995924	0.0011334	2.19046	0.0153411	0.0335361	0.0055971	0.0082943	0.0013478	0.0232813	0.0016058	0.0095113	0.0002256	95.8269	1.18871	38.3429	0.590214	0.590328	9.38551e-17	NM-316C	0.0035154	1.0754e-06	3.83628	1.00048	0.000682	4e-06	0.0001	2e-06	0.0002761	1e-06	0.0124	2e-05	0.008	0.0005	0.00015	1.5e-05	250
68403-154	Tc	2021-07-19	17.4167	39.6985	0.0220329	6.50494	0.0158509	0.0905522	0.0060042	0.0757321	0.0285588	0.0039292	0.0004107	0.995924	0.0011334	2.18397	0.0152488	0.0335361	0.0055971	0.0082943	0.0013478	0.0232813	0.0016058	0.009484	0.0002242	97.0875	0.316027	37.6871	0.150299	0.150732	3.25247e-16	NM-316C	0.0035154	1.0754e-06	3.83656	1.00048	0.000682	4e-06	0.0001	2e-06	0.0002761	1e-06	0.0124	2e-05	0.008	0.0005	0.00015	1.5e-05	250
68403-155	Tc	2021-07-19	17.5167	37.4261	0.0239601	6.09891	0.0160669	0.0813378	0.0063952	0.0503717	0.0271613	0.0071041	0.0004417	0.995924	0.0011334	2.1774	0.0151559	0.0335361	0.0055971	0.0082943	0.0013478	0.0232813	0.0016058	0.0094564	0.0002228	94.3948	0.360388	36.8528	0.167666	0.168038	3.04945e-16	NM-316C	0.0035154	1.0754e-06	3.83685	1.00048	0.000682	4e-06	0.0001	2e-06	0.0002761	1e-06	0.0124	2e-05	0.008	0.0005	0.00015	1.5e-05	250
68403-156	Tc	2021-07-19	17.6	57.0138	0.0234826	9.94288	0.0157438	0.128231	0.0055292	0.0677701	0.0260249	0.0091425	0.0004504	0.995924	0.0011334	2.17079	0.015063	0.0335361	0.0055971	0.0082943	0.0013478	0.0232813	0.0016058	0.0094287	0.0002214	95.2645	0.24092	34.7702	0.101782	0.102326	4.97144e-16	NM-316C	0.0035154	1.0754e-06	3.83714	1.00048	0.000682	4e-06	0.0001	2e-06	0.0002761	1e-06	0.0124	2e-05	0.008	0.0005	0.00015	1.5e-05	250
68403-158	Tc	2021-07-19	17.75	17.9507	0.021194	2.99677	0.0142489	0.0472561	0.0061003	0.0015175	0.028775	0.0024023	0.0003889	0.995924	0.0011334	2.1598	0.0149099	0.0335361	0.0055971	0.0082943	0.0013478	0.0232813	0.0016058	0.0093825	0.0002191	96.0424	0.661957	36.6019	0.300528	0.300733	1.49839e-16	NM-316C	0.0035154	1.0754e-06	3.83763	1.00048	0.000682	4e-06	0.0001	2e-06	0.0002761	1e-06	0.0124	2e-05	0.008	0.0005	0.00015	1.5e-05	250
68403-159	Tc	2021-07-19	17.8167	5.72704	0.0464235	0.473782	0.0509122	0.0537527	0.0183659	1.67728	0.0672702	0.0080366	0.0012716	0.995924	0.0011334	2.15528	0.0148474	0.0335361	0.0055971	0.0082943	0.0013478	0.0232813	0.0016058	0.0093635	0.0002182	60.9228	6.63482	46.8669	7.082	7.08201	2.36891e-17	NM-316C	0.0035154	1.0754e-06	3.83783	1.00048	0.000682	4e-06	0.0001	2e-06	0.0002761	1e-06	0.0124	2e-05	0.008	0.0005	0.00015	1.5e-05	250
68403-160	Tc	2021-07-19	17.9167	12.5569	0.0198004	2.05907	0.0137706	0.0233005	0.0061081	-0.0177893	0.0281812	0.0016358	0.0003884	0.995924	0.0011334	2.14875	0.0147576	0.0335361	0.0055971	0.0082943	0.0013478	0.0232813	0.0016058	0.0093361	0.0002168	96.1331	0.941379	37.2926	0.43405	0.434197	1.02953e-16	NM-316C	0.0035154	1.0754e-06	3.83811	1.00048	0.000682	4e-06	0.0001	2e-06	0.0002761	1e-06	0.0124	2e-05	0.008	0.0005	0.00015	1.5e-05	250
68403-161	Tc	2021-07-19	18	22.2032	0.0198369	3.16614	0.0136935	0.0369732	0.006003	0.0344537	0.0279277	0.0122618	0.0005033	0.995924	0.0011334	2.14222	0.0146683	0.0335361	0.0055971	0.0082943	0.0013478	0.0232813	0.0016058	0.0093087	0.0002155	83.674	0.680832	37.3327	0.339021	0.339209	1.58307e-16	NM-316C	0.0035154	1.0754e-06	3.8384	1.00048	0.000682	4e-06	0.0001	2e-06	0.0002761	1e-06	0.0124	2e-05	0.008	0.0005	0.00015	1.5e-05	250
68403-162	Tc	2021-07-19	18.0833	8.8412	0.0217292	0.989323	0.0149325	0.0141569	0.0061611	0.822999	0.0329788	0.0069795	0.0005054	0.995924	0.0011334	2.13636	0.0145889	0.0335361	0.0055971	0.0082943	0.0013478	0.0232813	0.0016058	0.0092841	0.0002143	77.4117	1.71935	43.9698	1.16245	1.16253	4.94662e-17	NM-316C	0.0035154	1.0754e-06	3.83866	1.00048	0.000682	4e-06	0.0001	2e-06	0.0002761	1e-06	0.0124	2e-05	0.008	0.0005	0.00015	1.5e-05	250
68403-163	Tc	2021-07-19	18.2833	33.1914	0.0209068	5.60642	0.0160785	0.053756	0.0064822	0.132908	0.0268868	0.0026244	0.0003986	0.995924	0.0011334	2.12183	0.0143938	0.0335361	0.0055971	0.0082943	0.0013478	0.0232813	0.0016058	0.0092231	0.0002113	97.6913	0.366421	36.7949	0.170522	0.170886	2.80321e-16	NM-316C	0.0035154	1.0754e-06	3.8393	1.00048	0.000682	4e-06	0.0001	2e-06	0.0002761	1e-06	0.0124	2e-05	0.008	0.0005	0.00015	1.5e-05	250
68403-164	Tc	2021-07-19	18.3833	7.03096	0.0189507	1.01378	0.0133654	0.0208675	0.0049656	0.007749	0.0251282	0.0051566	0.0003841	0.995924	0.0011334	2.11532	0.0143075	0.0335361	0.0055971	0.0082943	0.0013478	0.0232813	0.0016058	0.0091958	0.00021	78.3146	1.65258	34.5821	0.847734	0.847799	5.06888e-17	NM-316C	0.0035154	1.0754e-06	3.83959	1.00048	0.000682	4e-06	0.0001	2e-06	0.0002761	1e-06	0.0124	2e-05	0.008	0.0005	0.00015	1.5e-05	250
68403-165	Tc	2021-07-19	18.4667	6.99961	0.0193125	1.09098	0.0150972	0.0055573	0.0060059	0.235563	0.0255237	0.0026231	0.0003865	0.995924	0.0011334	2.10875	0.014221	0.0335361	0.0055971	0.0082943	0.0013478	0.0232813	0.0016058	0.0091682	0.0002087	89.183	1.6754	36.4147	0.835823	0.835896	5.45492e-17	NM-316C	0.0035154	1.0754e-06	3.83988	1.00048	0.000682	4e-06	0.0001	2e-06	0.0002761	1e-06	0.0124	2e-05	0.008	0.0005	0.00015	1.5e-05	250
68403-166	Tc	2021-07-19	18.5667	46.8728	0.0224021	7.51256	0.0144188	0.0914955	0.0063124	0.377151	0.022784	0.0109258	0.0004709	0.995924	0.0011334	2.10218	0.0141352	0.0335361	0.0055971	0.0082943	0.0013478	0.0232813	0.0016058	0.0091406	0.0002073	93.1685	0.30458	36.9836	0.137706	0.138161	3.75628e-16	NM-316C	0.0035154	1.0754e-06	3.84017	1.00048	0.000682	4e-06	0.0001	2e-06	0.0002761	1e-06	0.0124	2e-05	0.008	0.0005	0.00015	1.5e-05	250
68403-167	Tc	2021-07-19	18.65	23.0115	0.0210588	3.66011	0.0159363	0.074448	0.0063794	0.0290977	0.0318718	0.0034714	0.0004927	0.995924	0.0011334	2.0961	0.0140565	0.0335361	0.0055971	0.0082943	0.0013478	0.0232813	0.0016058	0.0091151	0.0002061	95.5507	0.646264	38.2064	0.302277	0.302498	1.83006e-16	NM-316C	0.0035154	1.0754e-06	3.84043	1.00048	0.000682	4e-06	0.0001	2e-06	0.0002761	1e-06	0.0124	2e-05	0.008	0.0005	0.00015	1.5e-05	250
68403-168	Tc	2021-07-19	18.7333	44.6902	0.0225171	7.50341	0.0146949	0.0970292	0.006316	0.127967	0.0267355	0.0045159	0.0003833	0.995924	0.0011334	2.08955	0.0139723	0.0335361	0.0055971	0.0082943	0.0013478	0.0232813	0.0016058	0.0090876	0.0002048	97.0334	0.263648	36.7681	0.120553	0.121066	3.7517e-16	NM-316C	0.0035154	1.0754e-06	3.84072	1.00048	0.000682	4e-06	0.0001	2e-06	0.0002761	1e-06	0.0124	2e-05	0.008	0.0005	0.00015	1.5e-05	250
68403-169	Tc	2021-07-19	18.8333	21.3688	0.0208033	2.92351	0.0156601	0.0459434	0.0056662	0.217904	0.0259256	0.0149245	0.0004942	0.995924	0.0011334	2.08298	0.0138886	0.0335361	0.0055971	0.0082943	0.0013478	0.0232813	0.0016058	0.00906	0.0002035	79.423	0.695507	36.9421	0.373876	0.374044	1.46176e-16	NM-316C	0.0035154	1.0754e-06	3.84101	1.00048	0.000682	4e-06	0.0001	2e-06	0.0002761	1e-06	0.0124	2e-05	0.008	0.0005	0.00015	1.5e-05	250
68403-170	Tc	2021-07-19	18.9167	27.7657	0.0209143	4.49835	0.0154324	0.0587202	0.0055683	0.288419	0.0256683	0.0048658	0.0003915	0.995924	0.0011334	2.07645	0.0138061	0.0335361	0.0055971	0.0082943	0.0013478	0.0232813	0.0016058	0.0090326	0.0002022	94.8997	0.430162	37.2642	0.207935	0.208241	2.24918e-16	NM-316C	0.0035154	1.0754e-06	3.8413	1.00048	0.000682	4e-06	0.0001	2e-06	0.0002761	1e-06	0.0124	2e-05	0.008	0.0005	0.00015	1.5e-05	250
68403-171	Tc	2021-07-19	19.0167	37.1783	0.0192581	6.05574	0.0159948	0.0741356	0.0054515	0.0670478	0.0278059	0.0050445	0.0004131	0.995924	0.0011334	2.06988	0.0137238	0.0335361	0.0055971	0.0082943	0.0013478	0.0232813	0.0016058	0.009005	0.0002009	95.9997	0.336771	37.4902	0.161871	0.162268	3.02787e-16	NM-316C	0.0035154	1.0754e-06	3.84159	1.00048	0.000682	4e-06	0.0001	2e-06	0.0002761	1e-06	0.0124	2e-05	0.008	0.0005	0.00015	1.5e-05	250
68403-172	Tc	2021-07-19	19.1	40.7206	0.0226291	6.92177	0.0153392	0.0849179	0.0065086	0.10548	0.025147	0.0015031	0.0003779	0.995924	0.0011334	2.06335	0.0136428	0.0335361	0.0055971	0.0082943	0.0013478	0.0232813	0.0016058	0.0089776	0.0001997	98.9286	0.285879	37.0234	0.131942	0.132418	3.46088e-16	NM-316C	0.0035154	1.0754e-06	3.84188	1.00048	0.000682	4e-06	0.0001	2e-06	0.0002761	1e-06	0.0124	2e-05	0.008	0.0005	0.00015	1.5e-05	250
68403-173	Tc	2021-07-19	19.2	8.28603	0.0182361	1.38225	0.0147061	0.0283994	0.0061117	0.095176	0.025645	0.0068132	0.0003828	0.995924	0.0011334	2.05672	0.0135613	0.0335361	0.0055971	0.0082943	0.0013478	0.0232813	0.0016058	0.0089497	0.0001984	75.7676	1.3948	28.9592	0.607895	0.607959	6.91127e-17	NM-316C	0.0035154	1.0754e-06	3.84217	1.00048	0.000682	4e-06	0.0001	2e-06	0.0002761	1e-06	0.0124	2e-05	0.008	0.0005	0.00015	1.5e-05	250
68403-174	Tc	2021-07-19	19.2833	72.8812	0.0233681	12.4491	0.0165679	0.16119	0.006816	0.208391	0.0239368	0.0037447	0.0004204	0.995924	0.0011334	2.05019	0.0134818	0.0335361	0.0055971	0.0082943	0.0013478	0.0232813	0.0016058	0.0089223	0.0001971	98.503	0.176972	36.6878	0.080353	0.0811176	6.22457e-16	NM-316C	0.0035154	1.0754e-06	3.84246	1.00048	0.000682	4e-06	0.0001	2e-06	0.0002761	1e-06	0.0124	2e-05	0.008	0.0005	0.00015	1.5e-05	250
68403-175	Tc	2021-07-19	19.3833	28.4226	0.0201831	4.86157	0.0148006	0.0657497	0.0054148	0.127793	0.0280414	0.0010068	0.0003562	0.995924	0.0011334	2.0436	0.0134024	0.0335361	0.0055971	0.0082943	0.0013478	0.0232813	0.0016058	0.0088947	0.0001959	98.989	0.384346	36.8176	0.178041	0.17839	2.43078e-16	NM-316C	0.0035154	1.0754e-06	3.84275	1.00048	0.000682	4e-06	0.0001	2e-06	0.0002761	1e-06	0.0124	2e-05	0.008	0.0005	0.00015	1.5e-05	250
68403-176	Tc	2021-07-19	19.4667	16.1907	0.0187983	2.27209	0.0144585	0.0397342	0.0056434	-0.0147781	0.0241822	0.0111626	0.0004433	0.995924	0.0011334	2.03701	0.0133238	0.0335361	0.0055971	0.0082943	0.0013478	0.0232813	0.0016058	0.008867	0.0001946	79.5982	0.823712	36.0999	0.432441	0.432579	1.13604e-16	NM-316C	0.0035154	1.0754e-06	3.84304	1.00048	0.000682	4e-06	0.0001	2e-06	0.0002761	1e-06	0.0124	2e-05	0.008	0.0005	0.00015	1.5e-05	250
68403-177	Tc	2021-07-19	19.5667	14.5607	0.0180232	2.41871	0.0161326	0.0274165	0.0059367	0.171584	0.0281133	0.001104	0.0003435	0.995924	0.0011334	2.03036	0.0132454	0.0335361	0.0055971	0.0082943	0.0013478	0.0232813	0.0016058	0.0088391	0.0001934	97.852	0.719509	37.4717	0.365577	0.365753	1.20935e-16	NM-316C	0.0035154	1.0754e-06	3.84334	1.00048	0.000682	4e-06	0.0001	2e-06	0.0002761	1e-06	0.0124	2e-05	0.008	0.0005	0.00015	1.5e-05	250
68403-178	Tc	2021-07-19	19.65	65.8894	0.023236	11.0285	0.0163206	0.141624	0.005637	0.160097	0.0247742	0.0035724	0.0003746	0.995924	0.0011334	2.02371	0.0131678	0.0335361	0.0055971	0.0082943	0.0013478	0.0232813	0.0016058	0.0088111	0.0001921	98.4156	0.175786	37.4011	0.0848677	0.0856201	5.51425e-16	NM-316C	0.0035154	1.0754e-06	3.84363	1.00048	0.000682	4e-06	0.0001	2e-06	0.0002761	1e-06	0.0124	2e-05	0.008	0.0005	0.00015	1.5e-05	250
68403-179	Tc	2021-07-19	19.75	36.8435	0.0216417	6.128	0.0152595	0.073021	0.0065044	0.12343	0.0255523	0.00426	0.000395	0.995924	0.0011334	2.01708	0.0130913	0.0335361	0.0055971	0.0082943	0.0013478	0.0232813	0.0016058	0.0087833	0.0001909	96.6056	0.327842	36.9509	0.152514	0.152924	3.064e-16	NM-316C	0.0035154	1.0754e-06	3.84392	1.00048	0.000682	4e-06	0.0001	2e-06	0.0002761	1e-06	0.0124	2e-05	0.008	0.0005	0.00015	1.5e-05	250
68403-180	Tc	2021-07-19	19.8333	47.1111	0.0211862	7.74048	0.0139904	0.0956933	0.0067057	0.225165	0.0280248	0.0070736	0.0004416	0.995924	0.0011334	2.01043	0.0130154	0.0335361	0.0055971	0.0082943	0.0013478	0.0232813	0.0016058	0.0087554	0.0001896	95.596	0.284527	37.015	0.126543	0.127038	3.87024e-16	NM-316C	0.0035154	1.0754e-06	3.84421	1.00048	0.000682	4e-06	0.0001	2e-06	0.0002761	1e-06	0.0124	2e-05	0.008	0.0005	0.00015	1.5e-05	250
68403-182	Tc	2021-07-20	7.86667	57.1299	0.0219104	9.61374	0.0136112	0.123623	0.0057062	0.0886676	0.0244656	0.005026	0.0003411	0.995924	0.0011334	1.1718	0.0138562	0.0335361	0.0055971	0.0082943	0.0013478	0.0232813	0.0016058	0.0052553	0.0001638	97.4095	0.185024	36.8263	0.0852204	0.0859471	4.80687e-16	NM-316C	0.0035154	1.0754e-06	3.88247	1.00049	0.000682	4e-06	0.0001	2e-06	0.0002761	1e-06	0.0124	2e-05	0.008	0.0005	0.00015	1.5e-05	250
68403-183	Tc	2021-07-20	7.96667	43.685	0.0202408	7.4694	0.0160162	0.0896789	0.0059702	0.114149	0.0270723	0.0014478	0.0002844	0.995924	0.0011334	1.18965	0.0133454	0.0335361	0.0055971	0.0082943	0.0013478	0.0232813	0.0016058	0.0053518	0.0001578	99.0402	0.20381	36.8496	0.107131	0.10771	3.7347e-16	NM-316C	0.0035154	1.0754e-06	3.88277	1.00049	0.000682	4e-06	0.0001	2e-06	0.0002761	1e-06	0.0124	2e-05	0.008	0.0005	0.00015	1.5e-05	250
68403-184	Tc	2021-07-20	8.06667	76.9561	0.0243616	12.8647	0.0165238	0.160952	0.006431	0.353482	0.0267803	0.0054639	0.0003538	0.995924	0.0011334	1.2073	0.0128743	0.0335361	0.0055971	0.0082943	0.0013478	0.0232813	0.0016058	0.0054472	0.0001523	97.9365	0.143601	37.2674	0.0709329	0.071825	6.43236e-16	NM-316C	0.0035154	1.0754e-06	3.88307	1.00049	0.000682	4e-06	0.0001	2e-06	0.0002761	1e-06	0.0124	2e-05	0.008	0.0005	0.00015	1.5e-05	250
68403-185	Tc	2021-07-20	8.15	16.7535	0.0182576	2.43153	0.0136479	0.0426546	0.0057007	0.0284536	0.0277835	0.0067633	0.0003698	0.995924	0.0011334	1.22484	0.0124429	0.0335361	0.0055971	0.0082943	0.0013478	0.0232813	0.0016058	0.0055419	0.0001472	88.0729	0.669261	38.5944	0.358549	0.358739	1.21577e-16	NM-316C	0.0035154	1.0754e-06	3.88336	1.00049	0.000682	4e-06	0.0001	2e-06	0.0002761	1e-06	0.0124	2e-05	0.008	0.0005	0.00015	1.5e-05	250
68403-186	Tc	2021-07-20	8.25	24.8072	0.0485295	4.29004	0.0138571	0.0502766	0.0062173	0.0495079	0.0297175	0.005449	0.0004539	0.995924	0.0011334	1.24253	0.0120489	0.0335361	0.0055971	0.0082943	0.0013478	0.0232813	0.0016058	0.0056375	0.0001426	93.5158	0.604461	34.4237	0.237253	0.237482	2.14502e-16	NM-316C	0.0035154	1.0754e-06	3.88365	1.00049	0.000682	4e-06	0.0001	2e-06	0.0002761	1e-06	0.0124	2e-05	0.008	0.0005	0.00015	1.5e-05	250
68403-187	Tc	2021-07-20	8.33333	48.0875	0.0189039	8.17265	0.015785	0.100709	0.0057095	0.030404	0.0242323	0.0031383	0.0003084	0.995924	0.0011334	1.26002	0.0117044	0.0335361	0.0055971	0.0082943	0.0013478	0.0232813	0.0016058	0.005732	0.0001386	98.0737	0.198006	36.7124	0.100566	0.101179	4.08633e-16	NM-316C	0.0035154	1.0754e-06	3.88395	1.00049	0.000682	4e-06	0.0001	2e-06	0.0002761	1e-06	0.0124	2e-05	0.008	0.0005	0.00015	1.5e-05	250
68403-188	Tc	2021-07-20	8.43333	22.0475	0.017082	4.25281	0.0152151	0.0626018	0.007172	-0.0033376	0.0269508	0.0067176	0.0003641	0.995924	0.0011334	1.27761	0.0114069	0.0335361	0.0055971	0.0082943	0.0013478	0.0232813	0.0016058	0.005827	0.0001352	90.9823	0.500192	30.0568	0.194253	0.194467	2.1264e-16	NM-316C	0.0035154	1.0754e-06	3.88424	1.00049	0.000682	4e-06	0.0001	2e-06	0.0002761	1e-06	0.0124	2e-05	0.008	0.0005	0.00015	1.5e-05	250
68403-189	Tc	2021-07-20	8.51667	5.45341	0.0167582	0.694271	0.0144815	0.0055718	0.0060328	0.838616	0.026424	0.0052432	0.0003747	0.995924	0.0011334	1.29509	0.0111638	0.0335361	0.0055971	0.0082943	0.0013478	0.0232813	0.0016058	0.0059215	0.0001324	72.8137	2.06826	36.4319	1.26738	1.26743	3.47136e-17	NM-316C	0.0035154	1.0754e-06	3.88453	1.00049	0.000682	4e-06	0.0001	2e-06	0.0002761	1e-06	0.0124	2e-05	0.008	0.0005	0.00015	1.5e-05	250
68403-190	Tc	2021-07-20	8.61667	45.9071	0.0206328	7.47122	0.0153882	0.0975095	0.0059954	0.032602	0.0267864	0.0065052	0.0003365	0.995924	0.0011334	1.31279	0.0109747	0.0335361	0.0055971	0.0082943	0.0013478	0.0232813	0.0016058	0.0060171	0.0001303	95.813	0.226	37.4491	0.114908	0.115466	3.73561e-16	NM-316C	0.0035154	1.0754e-06	3.88483	1.00049	0.000682	4e-06	0.0001	2e-06	0.0002761	1e-06	0.0124	2e-05	0.008	0.0005	0.00015	1.5e-05	250
68403-191	Tc	2021-07-20	8.7	32.9738	0.0211921	5.39144	0.0148479	0.0766774	0.0058906	0.055978	0.028716	0.00491	0.0003187	0.995924	0.0011334	1.33049	0.010846	0.0335361	0.0055971	0.0082943	0.0013478	0.0232813	0.0016058	0.0061128	0.0001289	95.6086	0.29984	37.198	0.151919	0.152336	2.69572e-16	NM-316C	0.0035154	1.0754e-06	3.88512	1.00049	0.000682	4e-06	0.0001	2e-06	0.0002761	1e-06	0.0124	2e-05	0.008	0.0005	0.00015	1.5e-05	250
68403-192	Tc	2021-07-20	8.91667	19.5485	0.0175496	3.08485	0.0129083	0.0440605	0.0058581	0.0785617	0.0255169	0.0051876	0.000316	0.995924	0.0011334	1.37013	0.0107862	0.0335361	0.0055971	0.0082943	0.0013478	0.0232813	0.0016058	0.006327	0.0001285	92.1819	0.493904	37.1632	0.248029	0.248284	1.54242e-16	NM-316C	0.0035154	1.0754e-06	3.88579	1.00049	0.000682	4e-06	0.0001	2e-06	0.0002761	1e-06	0.0124	2e-05	0.008	0.0005	0.00015	1.5e-05	250
68403-193	Tc	2021-07-20	9	108.899	0.024554	18.1863	0.0157046	0.222252	0.0053669	0.226992	0.0241336	0.0027091	0.0002868	0.995924	0.0011334	1.38841	0.0108662	0.0335361	0.0055971	0.0082943	0.0013478	0.0232813	0.0016058	0.0064257	0.0001296	99.2806	0.0850027	37.8109	0.0446409	0.0460855	9.09316e-16	NM-316C	0.0035154	1.0754e-06	3.88609	1.00049	0.000682	4e-06	0.0001	2e-06	0.0002761	1e-06	0.0124	2e-05	0.008	0.0005	0.00015	1.5e-05	250
68403-194	Tc	2021-07-20	9.1	101.469	0.0233409	18.0835	0.0169752	0.227529	0.0057759	0.40821	0.0260039	0.0020167	0.0003435	0.995924	0.0011334	1.40675	0.0110129	0.0335361	0.0055971	0.0082943	0.0013478	0.0232813	0.0016058	0.0065248	0.0001315	99.4446	0.106089	35.5095	0.0492465	0.0504078	9.04176e-16	NM-316C	0.0035154	1.0754e-06	3.8864	1.00049	0.000682	4e-06	0.0001	2e-06	0.0002761	1e-06	0.0124	2e-05	0.008	0.0005	0.00015	1.5e-05	250
68403-195	Tc	2021-07-20	9.2	21.4545	0.0182273	3.60246	0.0151408	0.0373997	0.0054905	0.0487549	0.028527	0.0011932	0.0002855	0.995924	0.0011334	1.42444	0.0112154	0.0335361	0.0055971	0.0082943	0.0013478	0.0232813	0.0016058	0.0066204	0.000134	98.3716	0.411755	37.267	0.2167	0.216993	1.80123e-16	NM-316C	0.0035154	1.0754e-06	3.88669	1.00049	0.000682	4e-06	0.0001	2e-06	0.0002761	1e-06	0.0124	2e-05	0.008	0.0005	0.00015	1.5e-05	250
68403-197	Tc	2021-07-20	9.35	52.7082	0.0186276	8.82721	0.0148566	0.103601	0.0056292	0.110966	0.025496	-0.0001769	0.0002697	0.995924	0.0011334	1.45362	0.011671	0.0335361	0.0055971	0.0082943	0.0013478	0.0232813	0.0016058	0.0067781	0.0001397	100.116	0.159947	38.0193	0.0863046	0.0870689	4.41361e-16	NM-316C	0.0035154	1.0754e-06	3.88718	1.00049	0.000682	4e-06	0.0001	2e-06	0.0002761	1e-06	0.0124	2e-05	0.008	0.0005	0.00015	1.5e-05	250
68403-199	Tc	2021-07-20	9.5	26.7948	0.0185344	5.1062	0.0159606	0.0613547	0.0071038	0.0155906	0.0261312	0.0009595	0.0002924	0.995924	0.0011334	1.48269	0.0122607	0.0335361	0.0055971	0.0082943	0.0013478	0.0232813	0.0016058	0.0069351	0.0001469	98.9445	0.337675	33.0597	0.149997	0.150332	2.5531e-16	NM-316C	0.0035154	1.0754e-06	3.88767	1.00049	0.000682	4e-06	0.0001	2e-06	0.0002761	1e-06	0.0124	2e-05	0.008	0.0005	0.00015	1.5e-05	250
68403-200	Tc	2021-07-20	9.58333	22.7836	0.0189298	3.80866	0.0146221	0.0414128	0.0055972	0.038726	0.0283373	0.0022327	0.0003389	0.995924	0.0011334	1.50018	0.0126728	0.0335361	0.0055971	0.0082943	0.0013478	0.0232813	0.0016058	0.0070296	0.0001519	97.1132	0.45545	36.9575	0.219763	0.220048	1.90433e-16	NM-316C	0.0035154	1.0754e-06	3.88796	1.00049	0.000682	4e-06	0.0001	2e-06	0.0002761	1e-06	0.0124	2e-05	0.008	0.0005	0.00015	1.5e-05	250
68403-201	Tc	2021-07-20	9.68333	11.2394	0.0169409	1.44826	0.0138905	0.0300572	0.0057104	0.0168098	0.0276134	0.0086391	0.000395	0.995924	0.0011334	1.51771	0.0131247	0.0335361	0.0055971	0.0082943	0.0013478	0.0232813	0.0016058	0.0071244	0.0001574	77.2783	1.0572	38.1522	0.628553	0.628659	7.2413e-17	NM-316C	0.0035154	1.0754e-06	3.88825	1.00049	0.000682	4e-06	0.0001	2e-06	0.0002761	1e-06	0.0124	2e-05	0.008	0.0005	0.00015	1.5e-05	250
68403-203	Tc	2021-07-20	9.83333	35.7295	0.0201942	5.93871	0.0149242	0.083723	0.0056031	0.094138	0.0292629	0.004264	0.0003675	0.995924	0.0011334	1.54694	0.0139532	0.0335361	0.0055971	0.0082943	0.0013478	0.0232813	0.0016058	0.0072823	0.0001674	96.491	0.314597	36.932	0.149131	0.14955	2.96936e-16	NM-316C	0.0035154	1.0754e-06	3.88874	1.00049	0.000682	4e-06	0.0001	2e-06	0.0002761	1e-06	0.0124	2e-05	0.008	0.0005	0.00015	1.5e-05	250
68403-204	Tc	2021-07-20	9.93333	20.0262	0.123467	2.41536	0.0187547	0.0461008	0.0061927	0.0658225	0.0278152	0.0226688	0.0005711	0.995924	0.0011334	1.56533	0.0145165	0.0335361	0.0055971	0.0082943	0.0013478	0.0232813	0.0016058	0.0073816	0.0001742	66.5469	1.12309	35.1319	0.609906	0.609999	1.20768e-16	NM-316C	0.0035154	1.0754e-06	3.88905	1.00049	0.000682	4e-06	0.0001	2e-06	0.0002761	1e-06	0.0124	2e-05	0.008	0.0005	0.00015	1.5e-05	250
68403-205	Tc	2021-07-20	10.0167	13.3357	0.0274882	2.10397	0.0143525	0.0314825	0.005675	0.0214007	0.0258137	0.0036601	0.0003724	0.995924	0.0011334	1.58281	0.0150783	0.0335361	0.0055971	0.0082943	0.0013478	0.0232813	0.0016058	0.0074761	0.000181	91.8936	0.872672	37.0559	0.422403	0.422552	1.05198e-16	NM-316C	0.0035154	1.0754e-06	3.88934	1.00049	0.000682	4e-06	0.0001	2e-06	0.0002761	1e-06	0.0124	2e-05	0.008	0.0005	0.00015	1.5e-05	250
68403-206	Tc	2021-07-20	10.1	42.4392	0.0274628	4.4611	0.0197175	0.058541	0.0065097	0.0089723	0.0355841	0.0021961	0.0004371	0.995924	0.0011334	1.59844	0.0155998	0.0335361	0.0055971	0.0082943	0.0013478	0.0232813	0.0016058	0.0075605	0.0001872	98.4714	0.318045	59.2604	0.317145	0.317646	2.23055e-16	NM-316C	0.0035154	1.0754e-06	3.8896	1.00049	0.000682	4e-06	0.0001	2e-06	0.0002761	1e-06	0.0124	2e-05	0.008	0.0005	0.00015	1.5e-05	250
68403-207	Tc	2021-07-20	10.2833	26.4981	0.0220391	4.40264	0.0141343	0.0541095	0.0059805	0.121331	0.0271193	0.0032752	0.0003882	0.995924	0.0011334	1.61798	0.0157189	0.0335361	0.0055971	0.0082943	0.0013478	0.0232813	0.0016058	0.0076574	0.0001887	96.3798	0.448941	36.9042	0.204511	0.204816	2.20132e-16	NM-316C	0.0035154	1.0754e-06	3.8902	1.00049	0.000682	4e-06	0.0001	2e-06	0.0002761	1e-06	0.0124	2e-05	0.008	0.0005	0.00015	1.5e-05	250
68403-209	Tc	2021-07-20	10.45	40.6107	0.0230805	6.7086	0.0157191	0.0860649	0.0057242	0.0193324	0.0248138	0.0021507	0.0003629	0.995924	0.0011334	1.61926	0.0148342	0.0335361	0.0055971	0.0082943	0.0013478	0.0232813	0.0016058	0.0076491	0.0001783	98.4369	0.276477	37.8995	0.135576	0.136061	3.3543e-16	NM-316C	0.0035154	1.0754e-06	3.8907	1.00049	0.000682	4e-06	0.0001	2e-06	0.0002761	1e-06	0.0124	2e-05	0.008	0.0005	0.00015	1.5e-05	250
68403-210	Tc	2021-07-20	10.55	25.7291	0.0210875	4.7008	0.0147994	0.0519735	0.0057703	0.0540049	0.0283819	0.0015213	0.0003472	0.995924	0.0011334	1.62013	0.0142747	0.0335361	0.0055971	0.0082943	0.0013478	0.0232813	0.0016058	0.0076434	0.0001719	98.2663	0.415907	34.2375	0.17682	0.177124	2.3504e-16	NM-316C	0.0035154	1.0754e-06	3.89104	1.00049	0.000682	4e-06	0.0001	2e-06	0.0002761	1e-06	0.0124	2e-05	0.008	0.0005	0.00015	1.5e-05	250
68403-211	Tc	2021-07-20	10.65	47.1906	0.0213718	7.76075	0.0154696	0.0874199	0.0059434	0.211491	0.0259824	0.0013645	0.0003021	0.995924	0.0011334	1.6209	0.0138059	0.0335361	0.0055971	0.0082943	0.0013478	0.0232813	0.0016058	0.0076383	0.0001666	99.1802	0.200291	38.353	0.106343	0.106975	3.88037e-16	NM-316C	0.0035154	1.0754e-06	3.89134	1.00049	0.000682	4e-06	0.0001	2e-06	0.0002761	1e-06	0.0124	2e-05	0.008	0.0005	0.00015	1.5e-05	250
68403-212	Tc	2021-07-20	10.7333	94.3671	0.0238857	16.3599	0.0148665	0.196088	0.0052566	0.233798	0.0236879	0.0012127	0.0003092	0.995924	0.0011334	1.62169	0.0133667	0.0335361	0.0055971	0.0082943	0.0013478	0.0232813	0.0016058	0.0076332	0.0001618	99.6395	0.104086	36.5655	0.0492104	0.0504412	8.17996e-16	NM-316C	0.0035154	1.0754e-06	3.89165	1.00049	0.000682	4e-06	0.0001	2e-06	0.0002761	1e-06	0.0124	2e-05	0.008	0.0005	0.00015	1.5e-05	250
68403-213	Tc	2021-07-20	10.8333	32.7587	0.021499	4.68992	0.0198263	0.0672697	0.006792	0.121507	0.0311123	0.0015297	0.0004051	0.995924	0.0011334	1.6224	0.0129996	0.0335361	0.0055971	0.0082943	0.0013478	0.0232813	0.0016058	0.0076285	0.0001579	98.6495	0.377517	43.7631	0.2451	0.245456	2.34496e-16	NM-316C	0.0035154	1.0754e-06	3.89192	1.00049	0.000682	4e-06	0.0001	2e-06	0.0002761	1e-06	0.0124	2e-05	0.008	0.0005	0.00015	1.5e-05	250
68403-214	Tc	2021-07-20	10.9167	44.9954	0.0217681	7.35587	0.0138002	0.0871665	0.0052845	-0.0343352	0.0254757	0.0051762	0.0003719	0.995924	0.0011334	1.62319	0.0126319	0.0335361	0.0055971	0.0082943	0.0013478	0.0232813	0.0016058	0.0076233	0.0001542	96.5894	0.253949	37.5813	0.118807	0.119351	3.67794e-16	NM-316C	0.0035154	1.0754e-06	3.89223	1.00049	0.000682	4e-06	0.0001	2e-06	0.0002761	1e-06	0.0124	2e-05	0.008	0.0005	0.00015	1.5e-05	250
68403-215	Tc	2021-07-20	11.0167	53.2239	0.0214836	8.85439	0.0154862	0.111187	0.0064596	0.045638	0.0268405	0.00358	0.000343	0.995924	0.0011334	1.62399	0.0123076	0.0335361	0.0055971	0.0082943	0.0013478	0.0232813	0.0016058	0.0076181	0.0001511	98.0166	0.199301	37.4767	0.0983702	0.0990226	4.42719e-16	NM-316C	0.0035154	1.0754e-06	3.89254	1.00049	0.000682	4e-06	0.0001	2e-06	0.0002761	1e-06	0.0124	2e-05	0.008	0.0005	0.00015	1.5e-05	250
68403-216	Tc	2021-07-20	11.1	22.8195	0.0207473	3.26023	0.0180273	0.0432365	0.0084525	0.430214	0.0312004	0.0009669	0.0003253	0.995924	0.0011334	1.62471	0.0120571	0.0335361	0.0055971	0.0082943	0.0013478	0.0232813	0.0016058	0.0076135	0.0001489	98.9007	0.440999	43.9661	0.306278	0.306566	1.63011e-16	NM-316C	0.0035154	1.0754e-06	3.89282	1.00049	0.000682	4e-06	0.0001	2e-06	0.0002761	1e-06	0.0124	2e-05	0.008	0.0005	0.00015	1.5e-05	250
68403-218	Tc	2021-07-20	11.4	23.3582	0.019093	3.63659	0.0157083	0.0439429	0.0060287	0.0810627	0.0298278	0.0054402	0.0003438	0.995924	0.0011334	1.62715	0.0115365	0.0335361	0.0055971	0.0082943	0.0013478	0.0232813	0.0016058	0.0075975	0.0001461	93.1369	0.449925	38.05	0.242219	0.242493	1.81829e-16	NM-316C	0.0035154	1.0754e-06	3.89377	1.00049	0.000682	4e-06	0.0001	2e-06	0.0002761	1e-06	0.0124	2e-05	0.008	0.0005	0.00015	1.5e-05	250
68403-219	Tc	2021-07-20	11.5	17.2988	0.0182169	2.76265	0.0139586	0.0389249	0.0057631	0.0296197	0.0241718	0.0024531	0.0003616	0.995924	0.0011334	1.62795	0.0114863	0.0335361	0.0055971	0.0082943	0.0013478	0.0232813	0.0016058	0.0075923	0.0001468	95.8188	0.635723	38.159	0.312559	0.312772	1.38133e-16	NM-316C	0.0035154	1.0754e-06	3.89408	1.00049	0.000682	4e-06	0.0001	2e-06	0.0002761	1e-06	0.0124	2e-05	0.008	0.0005	0.00015	1.5e-05	250
68403-220	Tc	2021-07-20	11.5833	34.7078	0.0234049	5.32134	0.0177122	0.0711214	0.0064529	0.0560295	0.0327563	0.0036278	0.0004229	0.995924	0.0011334	1.62865	0.0114926	0.0335361	0.0055971	0.0082943	0.0013478	0.0232813	0.0016058	0.0075876	0.000148	96.9209	0.372772	40.1847	0.200478	0.200846	2.66067e-16	NM-316C	0.0035154	1.0754e-06	3.89436	1.00049	0.000682	4e-06	0.0001	2e-06	0.0002761	1e-06	0.0124	2e-05	0.008	0.0005	0.00015	1.5e-05	250
68403-221	Tc	2021-07-20	11.9667	48.665	0.0191869	8.34529	0.0139071	0.111567	0.0068267	0.259374	0.0258798	0.0014706	0.0003377	0.995924	0.0011334	1.63175	0.0120684	0.0335361	0.0055971	0.0082943	0.0013478	0.0232813	0.0016058	0.0075674	0.0001601	99.1497	0.213129	36.7835	0.0980059	0.098637	4.17264e-16	NM-316C	0.0035154	1.0754e-06	3.89556	1.00049	0.000682	4e-06	0.0001	2e-06	0.0002761	1e-06	0.0124	2e-05	0.008	0.0005	0.00015	1.5e-05	250
68403-222	Tc	2021-07-20	12.05	23.7469	0.0191214	3.87076	0.0148178	0.054446	0.006966	0.205097	0.0247036	0.0037955	0.0003657	0.995924	0.0011334	1.63251	0.0123376	0.0335361	0.0055971	0.0082943	0.0013478	0.0232813	0.0016058	0.0075624	0.0001646	95.3419	0.469348	37.2105	0.227888	0.228167	1.93538e-16	NM-316C	0.0035154	1.0754e-06	3.89586	1.00049	0.000682	4e-06	0.0001	2e-06	0.0002761	1e-06	0.0124	2e-05	0.008	0.0005	0.00015	1.5e-05	250
68403-223	Tc	2021-07-20	12.15	38.8254	0.0203474	6.64141	0.0145939	0.0858376	0.0059481	-0.0069929	0.0297463	0.0010149	0.0003443	0.995924	0.0011334	1.63326	0.0126495	0.0335361	0.0055971	0.0082943	0.0013478	0.0232813	0.0016058	0.0075575	0.0001695	99.2251	0.272974	36.9012	0.127226	0.127716	3.32071e-16	NM-316C	0.0035154	1.0754e-06	3.89615	1.00049	0.000682	4e-06	0.0001	2e-06	0.0002761	1e-06	0.0124	2e-05	0.008	0.0005	0.00015	1.5e-05	250
68403-224	Tc	2021-07-20	12.2333	14.5985	0.0198683	2.39962	0.0147896	0.0358892	0.0057236	0.0126824	0.0274841	0.001274	0.0003278	0.995924	0.0011334	1.63402	0.0130024	0.0335361	0.0055971	0.0082943	0.0013478	0.0232813	0.0016058	0.0075526	0.0001749	97.426	0.691428	37.6995	0.34724	0.347428	1.19981e-16	NM-316C	0.0035154	1.0754e-06	3.89645	1.00049	0.000682	4e-06	0.0001	2e-06	0.0002761	1e-06	0.0124	2e-05	0.008	0.0005	0.00015	1.5e-05	250
68403-225	Tc	2021-07-20	12.3333	21.2928	0.0204194	3.35946	0.0147094	0.0456536	0.0054765	0.0373748	0.0275449	0.0033022	0.0003338	0.995924	0.0011334	1.63479	0.0133981	0.0335361	0.0055971	0.0082943	0.0013478	0.0232813	0.0016058	0.0075476	0.0001808	95.4261	0.482724	38.4644	0.25216	0.252429	1.67973e-16	NM-316C	0.0035154	1.0754e-06	3.89675	1.00049	0.000682	4e-06	0.0001	2e-06	0.0002761	1e-06	0.0124	2e-05	0.008	0.0005	0.00015	1.5e-05	250
68403-226	Tc	2021-07-20	12.4333	20.9273	0.0256247	3.31329	0.0160667	0.293059	0.0051889	0.032456	0.0257878	0.0019248	0.0004019	0.995924	0.0011334	1.63557	0.0138412	0.0335361	0.0055971	0.0082943	0.0013478	0.0232813	0.0016058	0.0075424	0.0001872	97.33	0.593677	39.0888	0.297758	0.297993	1.65664e-16	NM-316C	0.0035154	1.0754e-06	3.89705	1.00049	0.000682	4e-06	0.0001	2e-06	0.0002761	1e-06	0.0124	2e-05	0.008	0.0005	0.00015	1.5e-05	250
68403-227	Tc	2021-07-20	12.5167	20.6616	0.0204039	3.2572	0.0147681	0.0463968	0.0058821	0.0368738	0.0289454	0.0026157	0.0003766	0.995924	0.0011334	1.63633	0.0142996	0.0335361	0.0055971	0.0082943	0.0013478	0.0232813	0.0016058	0.0075375	0.0001937	96.2696	0.556679	38.8323	0.279908	0.280154	1.6286e-16	NM-316C	0.0035154	1.0754e-06	3.89735	1.00049	0.000682	4e-06	0.0001	2e-06	0.0002761	1e-06	0.0124	2e-05	0.008	0.0005	0.00015	1.5e-05	250
68403-228	Tc	2021-07-20	12.6167	72.9633	0.0260682	12.5281	0.0155335	0.532835	0.0059136	0.284382	0.0259315	0.0026127	0.0003835	0.995924	0.0011334	1.63709	0.0147865	0.0335361	0.0055971	0.0082943	0.0013478	0.0232813	0.0016058	0.0075325	0.0002006	98.9887	0.163942	36.6775	0.0739692	0.0747987	6.26406e-16	NM-316C	0.0035154	1.0754e-06	3.89764	1.00049	0.000682	4e-06	0.0001	2e-06	0.0002761	1e-06	0.0124	2e-05	0.008	0.0005	0.00015	1.5e-05	250
68403-230	Tc	2021-07-20	12.7667	76.5742	0.0256617	13.8159	0.0163664	0.187578	0.0071547	0.108225	0.026883	0.0031097	0.0003745	0.995924	0.0011334	1.63834	0.0156461	0.0335361	0.0055971	0.0082943	0.0013478	0.0232813	0.0016058	0.0075244	0.0002124	98.8102	0.152779	34.8563	0.0662116	0.0670487	6.90797e-16	NM-316C	0.0035154	1.0754e-06	3.89813	1.00049	0.000682	4e-06	0.0001	2e-06	0.0002761	1e-06	0.0124	2e-05	0.008	0.0005	0.00015	1.5e-05	250
68403-231	Tc	2021-07-20	12.95	42.8493	0.0236599	6.99407	0.0129481	0.0851859	0.0060002	0.115501	0.0279357	0.0077319	0.0004519	0.995924	0.0011334	1.63649	0.0157128	0.0335361	0.0055971	0.0082943	0.0013478	0.0232813	0.0016058	0.0074988	0.0002134	94.6825	0.321479	36.9045	0.139856	0.140302	3.49704e-16	NM-316C	0.0035154	1.0754e-06	3.89873	1.00049	0.000682	4e-06	0.0001	2e-06	0.0002761	1e-06	0.0124	2e-05	0.008	0.0005	0.00015	1.5e-05	250
68403-232	Tc	2021-07-20	13.05	24.4241	0.0209603	4.13256	0.0138307	0.0530655	0.0064235	0.028199	0.0279708	0.0023058	0.0003501	0.995924	0.0011334	1.63378	0.0151984	0.0335361	0.0055971	0.0082943	0.0013478	0.0232813	0.0016058	0.007478	0.0002064	97.2159	0.441039	36.5553	0.201742	0.202045	2.06628e-16	NM-316C	0.0035154	1.0754e-06	3.89902	1.00049	0.000682	4e-06	0.0001	2e-06	0.0002761	1e-06	0.0124	2e-05	0.008	0.0005	0.00015	1.5e-05	250
68403-233	Tc	2021-07-20	13.1333	53.8538	0.0227261	9.00203	0.0161626	0.107554	0.0057529	0.0592786	0.0297847	0.0018017	0.0003864	0.995924	0.0011334	1.63105	0.0146982	0.0335361	0.0055971	0.0082943	0.0013478	0.0232813	0.0016058	0.007457	0.0001997	99.0186	0.22085	37.6773	0.105624	0.106238	4.50102e-16	NM-316C	0.0035154	1.0754e-06	3.89932	1.00049	0.000682	4e-06	0.0001	2e-06	0.0002761	1e-06	0.0124	2e-05	0.008	0.0005	0.00015	1.5e-05	250
68403-234	Tc	2021-07-20	13.2333	34.379	0.0202282	5.76257	0.0151624	0.0696887	0.005574	0.027246	0.0268399	0.0013079	0.0003392	0.995924	0.0011334	1.62834	0.0142201	0.0335361	0.0055971	0.0082943	0.0013478	0.0232813	0.0016058	0.0074362	0.0001933	98.8804	0.303799	37.5224	0.148695	0.149129	2.88128e-16	NM-316C	0.0035154	1.0754e-06	3.89961	1.00049	0.000682	4e-06	0.0001	2e-06	0.0002761	1e-06	0.0124	2e-05	0.008	0.0005	0.00015	1.5e-05	250
68403-235	Tc	2021-07-20	13.3167	10.9891	0.0179779	1.5605	0.015066	0.019285	0.0051292	0.101022	0.0249288	0.0057164	0.000347	0.995924	0.0011334	1.62563	0.0137629	0.0335361	0.0055971	0.0082943	0.0013478	0.0232813	0.0016058	0.0074154	0.0001872	84.6855	0.958657	37.9374	0.555577	0.555695	7.80251e-17	NM-316C	0.0035154	1.0754e-06	3.8999	1.00049	0.000682	4e-06	0.0001	2e-06	0.0002761	1e-06	0.0124	2e-05	0.008	0.0005	0.00015	1.5e-05	250
68403-236	Tc	2021-07-20	13.4167	97.3058	0.0246387	17.1951	0.0157705	0.221642	0.0063981	0.0892552	0.0278211	0.0176146	0.000464	0.995924	0.0011334	1.6229	0.0133263	0.0335361	0.0055971	0.0082943	0.0013478	0.0232813	0.0016058	0.0073945	0.0001814	94.6506	0.1459	34.0986	0.0599383	0.0608227	8.59756e-16	NM-316C	0.0035154	1.0754e-06	3.9002	1.00049	0.000682	4e-06	0.0001	2e-06	0.0002761	1e-06	0.0124	2e-05	0.008	0.0005	0.00015	1.5e-05	250
68403-237	Tc	2021-07-20	13.5	35.9639	0.0219769	5.91023	0.0166671	0.0715661	0.0058082	0.16937	0.0267024	0.0064627	0.0004007	0.995924	0.0011334	1.62018	0.0129154	0.0335361	0.0055971	0.0082943	0.0013478	0.0232813	0.0016058	0.0073735	0.0001761	94.7209	0.340541	36.6717	0.16447	0.164844	2.95512e-16	NM-316C	0.0035154	1.0754e-06	3.90049	1.00049	0.000682	4e-06	0.0001	2e-06	0.0002761	1e-06	0.0124	2e-05	0.008	0.0005	0.00015	1.5e-05	250
68403-238	Tc	2021-07-20	13.6	48.9775	0.0219549	7.93624	0.0157782	0.0989488	0.0064627	0.104507	0.0271541	0.009348	0.0003905	0.995924	0.0011334	1.61746	0.012534	0.0335361	0.0055971	0.0082943	0.0013478	0.0232813	0.0016058	0.0073527	0.0001711	94.3698	0.244177	37.0507	0.118574	0.119104	3.96812e-16	NM-316C	0.0035154	1.0754e-06	3.90079	1.00049	0.000682	4e-06	0.0001	2e-06	0.0002761	1e-06	0.0124	2e-05	0.008	0.0005	0.00015	1.5e-05	250
68403-239	Tc	2021-07-20	13.6833	26.1231	0.0185479	3.59463	0.0156997	0.0430934	0.0059981	0.0329307	0.0277042	0.0152966	0.000482	0.995924	0.0011334	1.6147	0.0121792	0.0335361	0.0055971	0.0082943	0.0013478	0.0232813	0.0016058	0.0073315	0.0001666	82.6873	0.55375	38.2239	0.301362	0.301584	1.79732e-16	NM-316C	0.0035154	1.0754e-06	3.90109	1.00049	0.000682	4e-06	0.0001	2e-06	0.0002761	1e-06	0.0124	2e-05	0.008	0.0005	0.00015	1.5e-05	250
68403-241	Tc	2021-07-20	13.8333	77.3072	0.0300642	3.91457	0.0174792	0.0507132	0.006965	0.0312963	0.0307736	0.0029851	0.0003983	0.995924	0.0011334	1.61051	0.0117057	0.0335361	0.0055971	0.0082943	0.0013478	0.0232813	0.0016058	0.0072993	0.0001606	98.8618	0.161924	121.463	0.557281	0.558439	1.95729e-16	NM-316C	0.0035154	1.0754e-06	3.90154	1.00049	0.000682	4e-06	0.0001	2e-06	0.0002761	1e-06	0.0124	2e-05	0.008	0.0005	0.00015	1.5e-05	250
68403-242	Tc	2021-07-20	13.9167	37.6305	0.021702	5.87099	0.0185723	0.0749616	0.0074398	0.0424755	0.0358128	0.001401	0.0003871	0.995924	0.0011334	1.60798	0.0114629	0.0335361	0.0055971	0.0082943	0.0013478	0.0232813	0.0016058	0.0072799	0.0001577	98.9077	0.31529	40.297	0.177604	0.178022	2.9355e-16	NM-316C	0.0035154	1.0754e-06	3.90181	1.00049	0.000682	4e-06	0.0001	2e-06	0.0002761	1e-06	0.0124	2e-05	0.008	0.0005	0.00015	1.5e-05	250
68403-243	Tc	2021-07-20	14	38.381	0.021542	6.58305	0.0155495	0.0778612	0.0058171	0.117472	0.0273105	0.0015666	0.0003159	0.995924	0.0011334	1.60522	0.0112377	0.0335361	0.0055971	0.0082943	0.0013478	0.0232813	0.0016058	0.0072587	0.0001551	98.8167	0.256412	36.6536	0.12574	0.126229	3.29152e-16	NM-316C	0.0035154	1.0754e-06	3.90211	1.00049	0.000682	4e-06	0.0001	2e-06	0.0002761	1e-06	0.0124	2e-05	0.008	0.0005	0.00015	1.5e-05	250
68403-244	Tc	2021-07-20	14.1	4.87411	0.0168434	0.877652	0.0140734	0.0099031	0.0064949	0.0806415	0.0252028	0.0017215	0.0003556	0.995924	0.0011334	1.60246	0.0110565	0.0335361	0.0055971	0.0082943	0.0013478	0.0232813	0.0016058	0.0072375	0.0001531	89.682	2.20869	31.7288	0.918478	0.918528	4.38826e-17	NM-316C	0.0035154	1.0754e-06	3.90241	1.00049	0.000682	4e-06	0.0001	2e-06	0.0002761	1e-06	0.0124	2e-05	0.008	0.0005	0.00015	1.5e-05	250
68403-245	Tc	2021-07-20	14.2	19.198	0.0195659	3.32056	0.0143079	0.0406123	0.0060996	0.0395781	0.0319066	0.0023395	0.0002959	0.995924	0.0011334	1.59961	0.0109181	0.0335361	0.0055971	0.0082943	0.0013478	0.0232813	0.0016058	0.0072157	0.0001517	96.4105	0.477965	35.4732	0.228095	0.228348	1.66028e-16	NM-316C	0.0035154	1.0754e-06	3.90272	1.00049	0.000682	4e-06	0.0001	2e-06	0.0002761	1e-06	0.0124	2e-05	0.008	0.0005	0.00015	1.5e-05	250
68403-246	Tc	2021-07-20	14.2833	13.5302	0.0178095	2.70745	0.0129253	0.0232138	0.005465	0.0604986	0.0277855	0.0019607	0.0003268	0.995924	0.0011334	1.59677	0.0108306	0.0335361	0.0055971	0.0082943	0.0013478	0.0232813	0.0016058	0.0071939	0.000151	95.7447	0.73822	30.4854	0.271381	0.271539	1.35373e-16	NM-316C	0.0035154	1.0754e-06	3.90303	1.00049	0.000682	4e-06	0.0001	2e-06	0.0002761	1e-06	0.0124	2e-05	0.008	0.0005	0.00015	1.5e-05	250
68403-247	Tc	2021-07-20	14.3833	42.3949	0.0209777	4.74864	0.0187767	0.0644975	0.0065326	0.0005023	0.0350503	0.0032801	0.0003833	0.995924	0.0011334	1.59422	0.0107963	0.0335361	0.0055971	0.0082943	0.0013478	0.0232813	0.0016058	0.0071743	0.0001511	97.712	0.276452	55.2429	0.263362	0.263888	2.37432e-16	NM-316C	0.0035154	1.0754e-06	3.9033	1.00049	0.000682	4e-06	0.0001	2e-06	0.0002761	1e-06	0.0124	2e-05	0.008	0.0005	0.00015	1.5e-05	250
68403-248	Tc	2021-07-20	14.4667	14.3209	0.0168822	2.37008	0.0146298	0.0130223	0.0056308	-0.0264315	0.0280574	0.0011118	0.0003424	0.995924	0.0011334	1.5914	0.0108076	0.0335361	0.0055971	0.0082943	0.0013478	0.0232813	0.0016058	0.0071527	0.0001518	97.6839	0.72666	37.5435	0.356727	0.356908	1.18504e-16	NM-316C	0.0035154	1.0754e-06	3.90361	1.00049	0.000682	4e-06	0.0001	2e-06	0.0002761	1e-06	0.0124	2e-05	0.008	0.0005	0.00015	1.5e-05	250
68403-249	Tc	2021-07-20	14.5667	12.8457	0.0195947	1.91388	0.015597	0.024222	0.0054283	-0.0253826	0.029164	0.0059121	0.0003697	0.995924	0.0011334	1.5885	0.010873	0.0335361	0.0055971	0.0082943	0.0013478	0.0232813	0.0016058	0.0071304	0.0001533	86.3672	0.8754	36.8836	0.471879	0.472011	9.56939e-17	NM-316C	0.0035154	1.0754e-06	3.90392	1.00049	0.000682	4e-06	0.0001	2e-06	0.0002761	1e-06	0.0124	2e-05	0.008	0.0005	0.00015	1.5e-05	250
68403-250	Tc	2021-07-20	14.6667	19.2065	0.016962	3.11754	0.0159222	0.0423106	0.0056301	0.0220191	0.0247249	0.0023858	0.0003282	0.995924	0.0011334	1.58573	0.0109858	0.0335361	0.0055971	0.0082943	0.0013478	0.0232813	0.0016058	0.0071091	0.0001553	96.3342	0.520615	37.7497	0.276025	0.276262	1.55877e-16	NM-316C	0.0035154	1.0754e-06	3.90422	1.00049	0.000682	4e-06	0.0001	2e-06	0.0002761	1e-06	0.0124	2e-05	0.008	0.0005	0.00015	1.5e-05	250
68403-251	Tc	2021-07-20	14.8667	33.3838	0.0190891	5.45304	0.0132447	0.0688043	0.0059997	0.0641707	0.0282084	0.0032084	0.0003473	0.995924	0.0011334	1.57957	0.0114026	0.0335361	0.0055971	0.0082943	0.0013478	0.0232813	0.0016058	0.0070618	0.0001622	97.1719	0.318317	37.8374	0.151254	0.151688	2.72652e-16	NM-316C	0.0035154	1.0754e-06	3.90489	1.00049	0.000682	4e-06	0.0001	2e-06	0.0002761	1e-06	0.0124	2e-05	0.008	0.0005	0.00015	1.5e-05	250
68403-252	Tc	2021-07-20	14.9667	43.7221	0.020907	6.99818	0.0151942	0.0934153	0.0055272	0.0313148	0.0249805	0.0073461	0.0003619	0.995924	0.0011334	1.57678	0.0116616	0.0335361	0.0055971	0.0082943	0.0013478	0.0232813	0.0016058	0.0070405	0.0001662	95.0348	0.253952	37.7658	0.127486	0.127998	3.49909e-16	NM-316C	0.0035154	1.0754e-06	3.90519	1.00049	0.000682	4e-06	0.0001	2e-06	0.0002761	1e-06	0.0124	2e-05	0.008	0.0005	0.00015	1.5e-05	250
[truncated: 3 more columns]
